# Supplementary material for: Transancestral mapping and genetic load in systemic lupus erythematosus
Source: PubMed Central journal article supplement (PMC5520018; doi:10.1038/ncomms16021), 2017-07-17

# SI GUIDE

Title of file for HTML: Supplementary Information

Description: Supplementary Figures.

Supplementary Data

Title of file for HTML: Supplementary Data 1

Description: Sample counts by SLE status

Title of file for HTML: Supplementary Data 2

Description: Complete list of associations by ancestry and tier (nonHLA).

Title of file for HTML: Supplementary Data 3

Description: Posterior probabilities for HLA imputation

Title of file for HTML: Supplementary Data 4

Description: Classical HLA associations.

Title of file for HTML: Supplementary Data 5

Description: HLA stepwise model results

Title of file for HTML: Supplementary Data 6

Description: SNP associations, post-adjustment for HLA alleles.

Title of file for HTML: Supplementary Data 7

Description: SLE risk for DRB1 homozygotes and heterozygotes

Title of file for HTML: Supplementary Data 8

Description: Secondary top meta-analysis and transancestral-mapping Regions.

Title of file for HTML: Supplementary Data 9

Description: Meta-analysis regions with p-value<sub>FDR</sub> <0.001.

Title of file for HTML: Supplementary Data 10  
Description: Deviations in average risk-allele admixture.

Title of file for HTML: Supplementary Data 11  
Description: Binomial test of CEU vs YRI admixture deviations.

Title of file for HTML: Supplementary Data 12  
Description: cisEQTLs for regions in Tier 1 and Tier 2

Title of file for HTML: Supplementary Data 13  
Description: Most likely functional SNPs based on RegulomeDB scores

Title of file for HTML: Supplementary Data 14  
Description: Prioritized SLE risk genes.

Title of file for HTML: Peer Review File  
Description:

# Supplementary Figure 1. Admixture by ancestry.

## a. European Ancestry

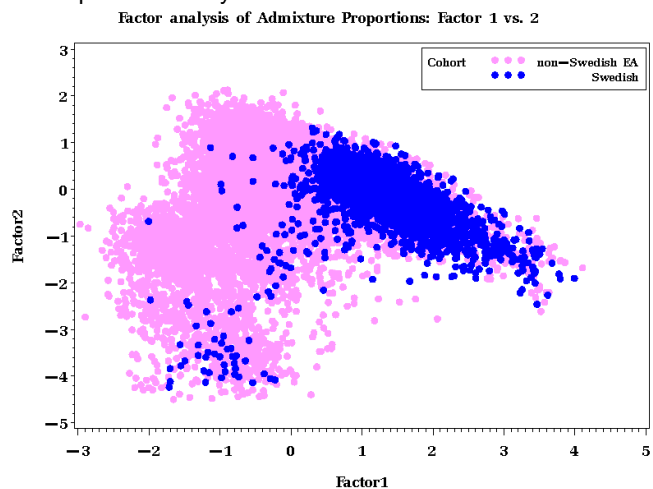

## b. African American

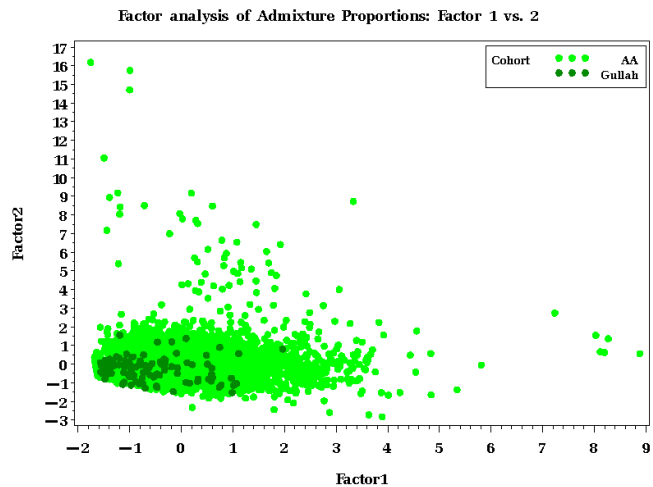

## c. Hispanic Ancestry

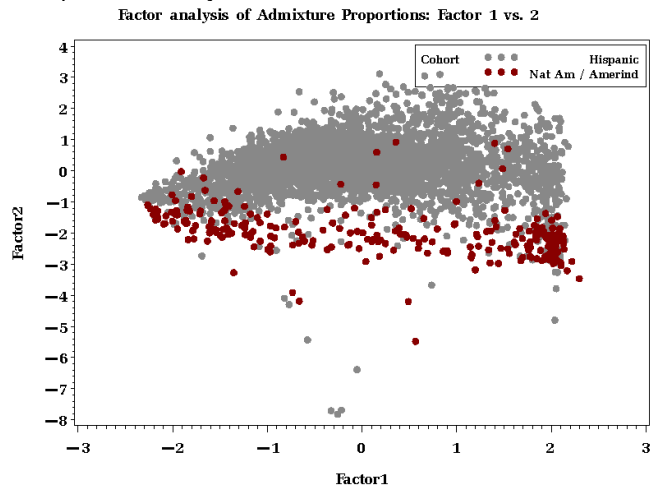

Supplementary Figure 2. PP-plot by ancestry.

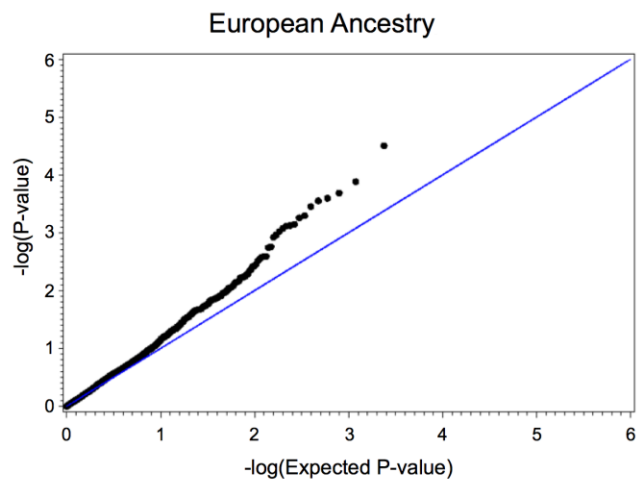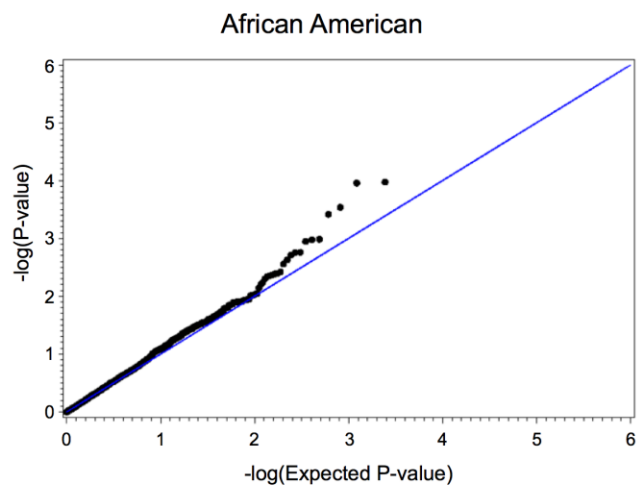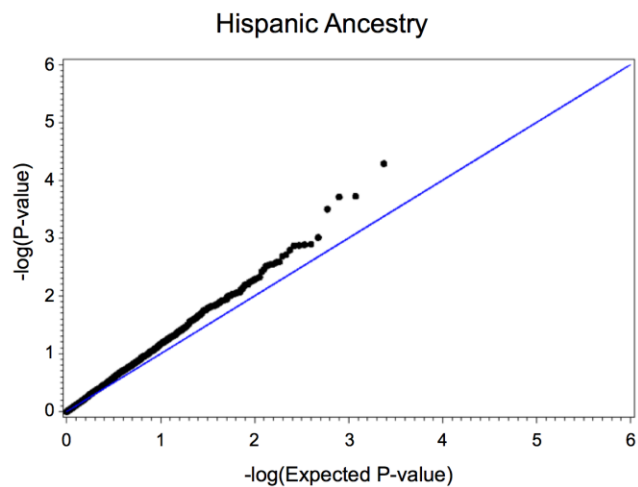

Supplementary Figure 3. Power by ancestry ( $\alpha=5 \times 10^{-8}$ ).

a. European Ancestry

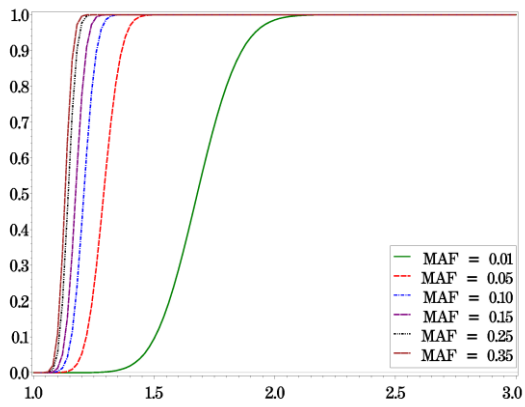

b. African American

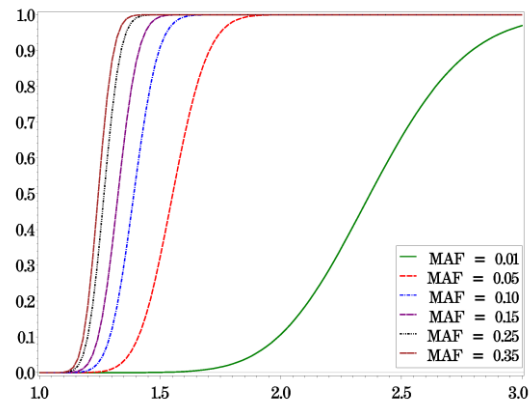

c. Hispanic Ancestry

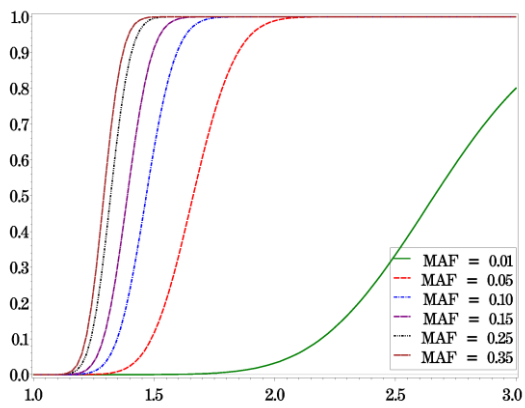

d. Meta-analysis

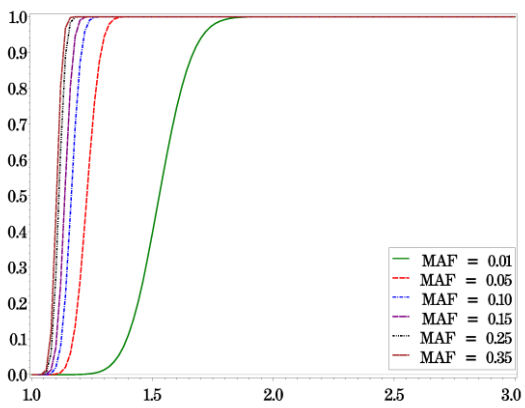

Supplementary Figure 4. Meta-analysis of chromosome X region of association (female only).

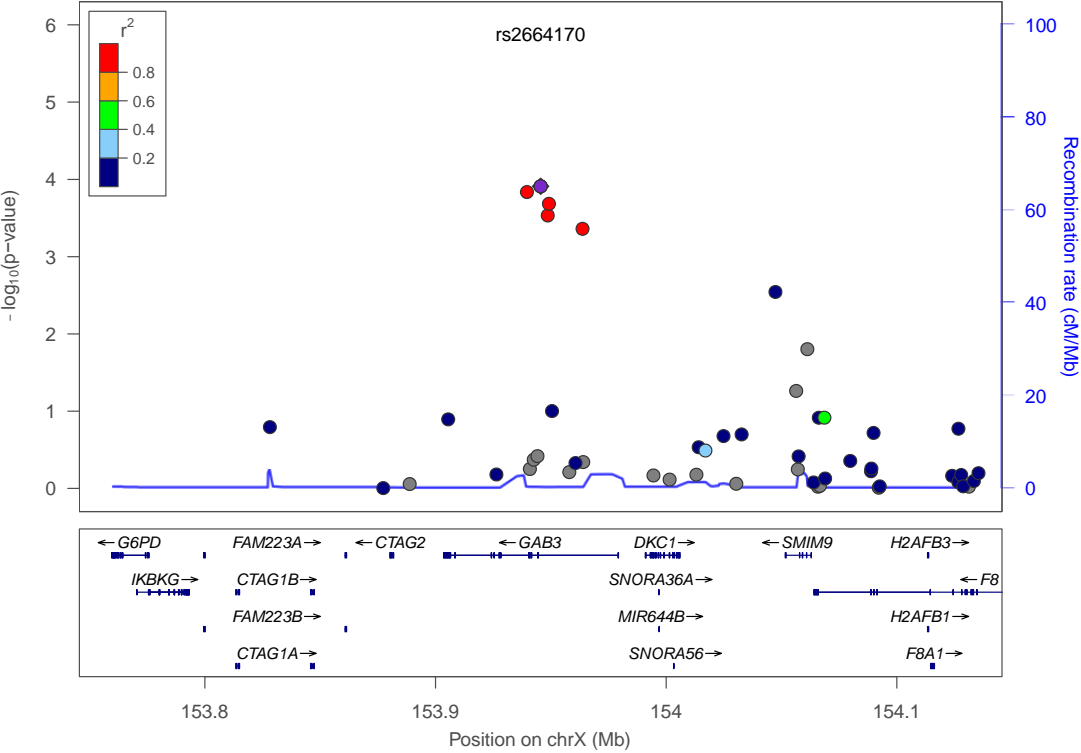

Supplementary Figure 5. Posterior probability distributions for best guess HLA imputed alleles.

a. European Ancestry

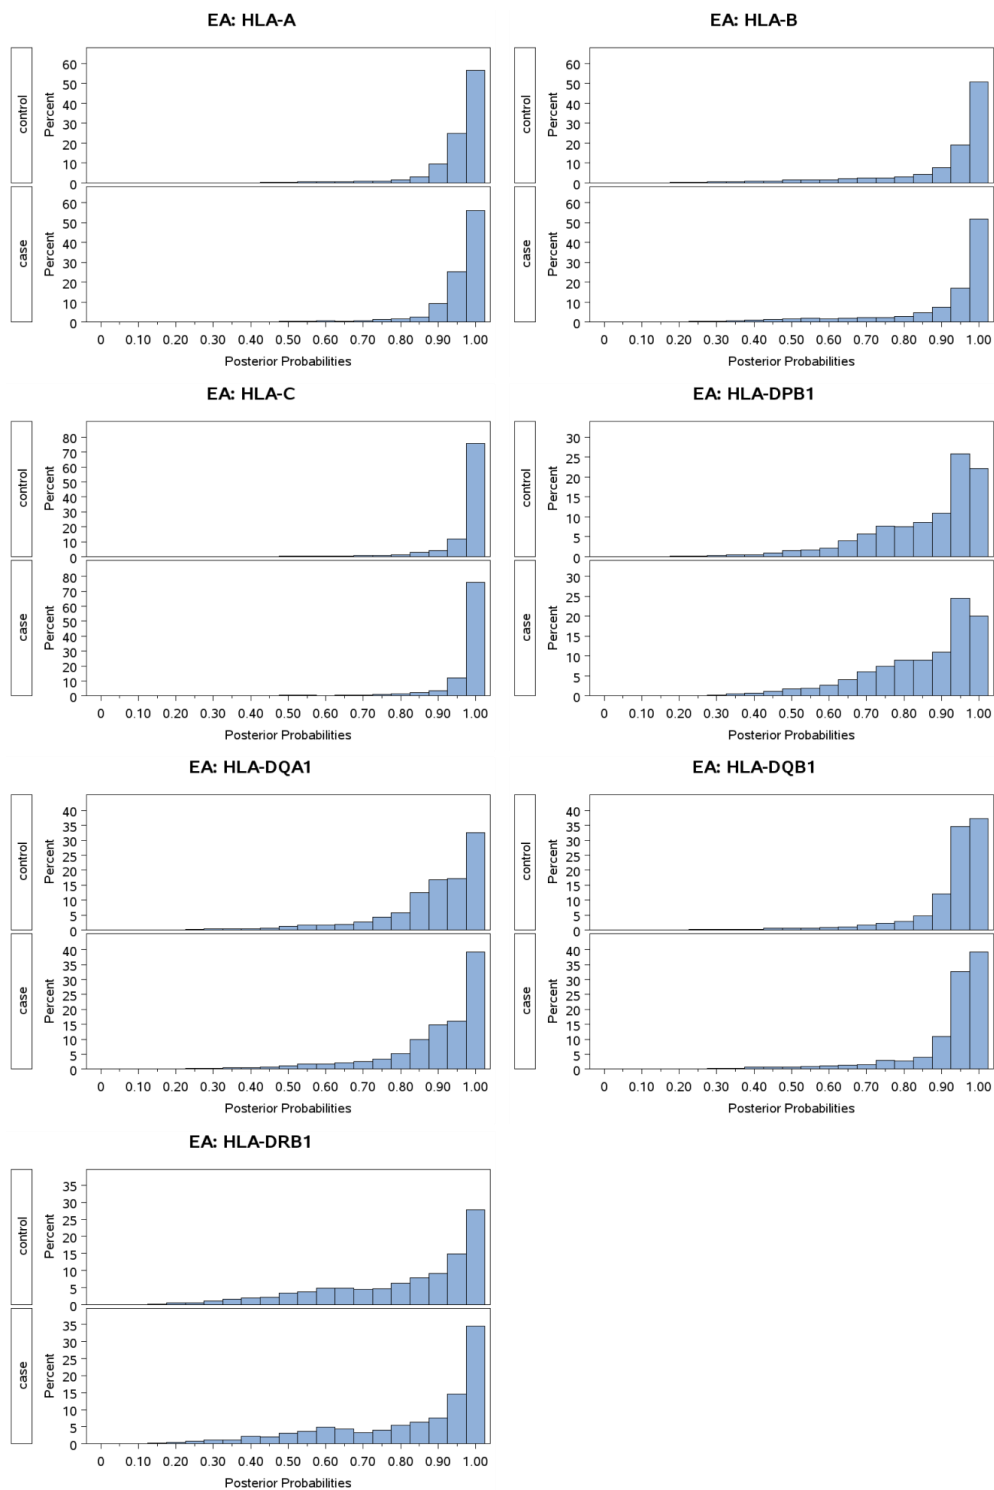

b. African American

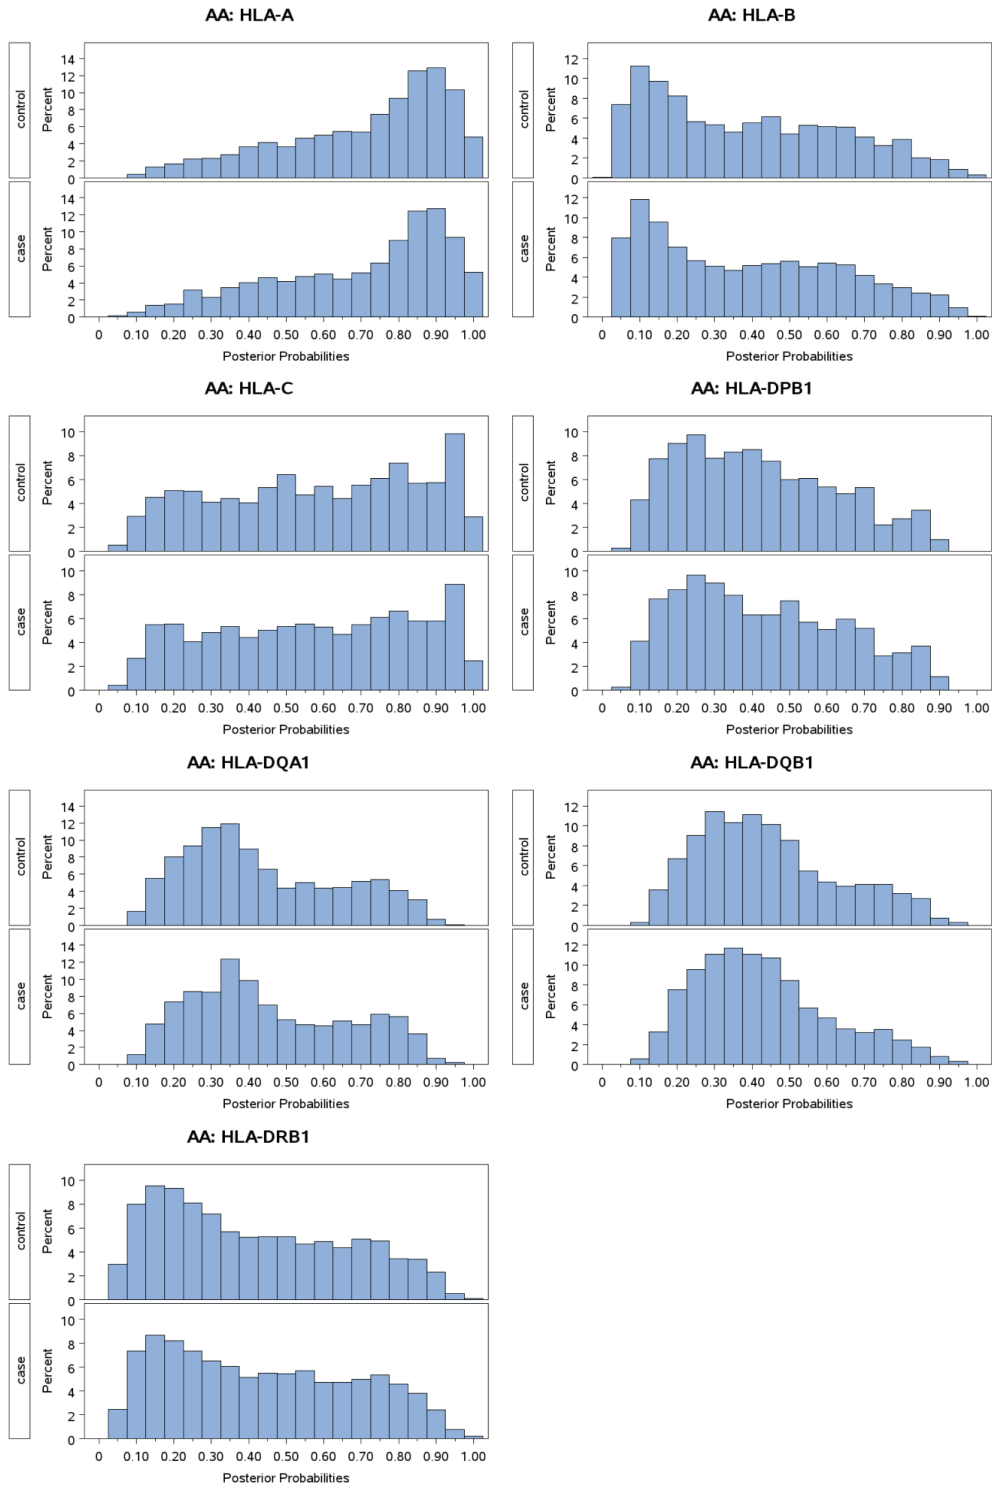



c. Hispanic Ancestry

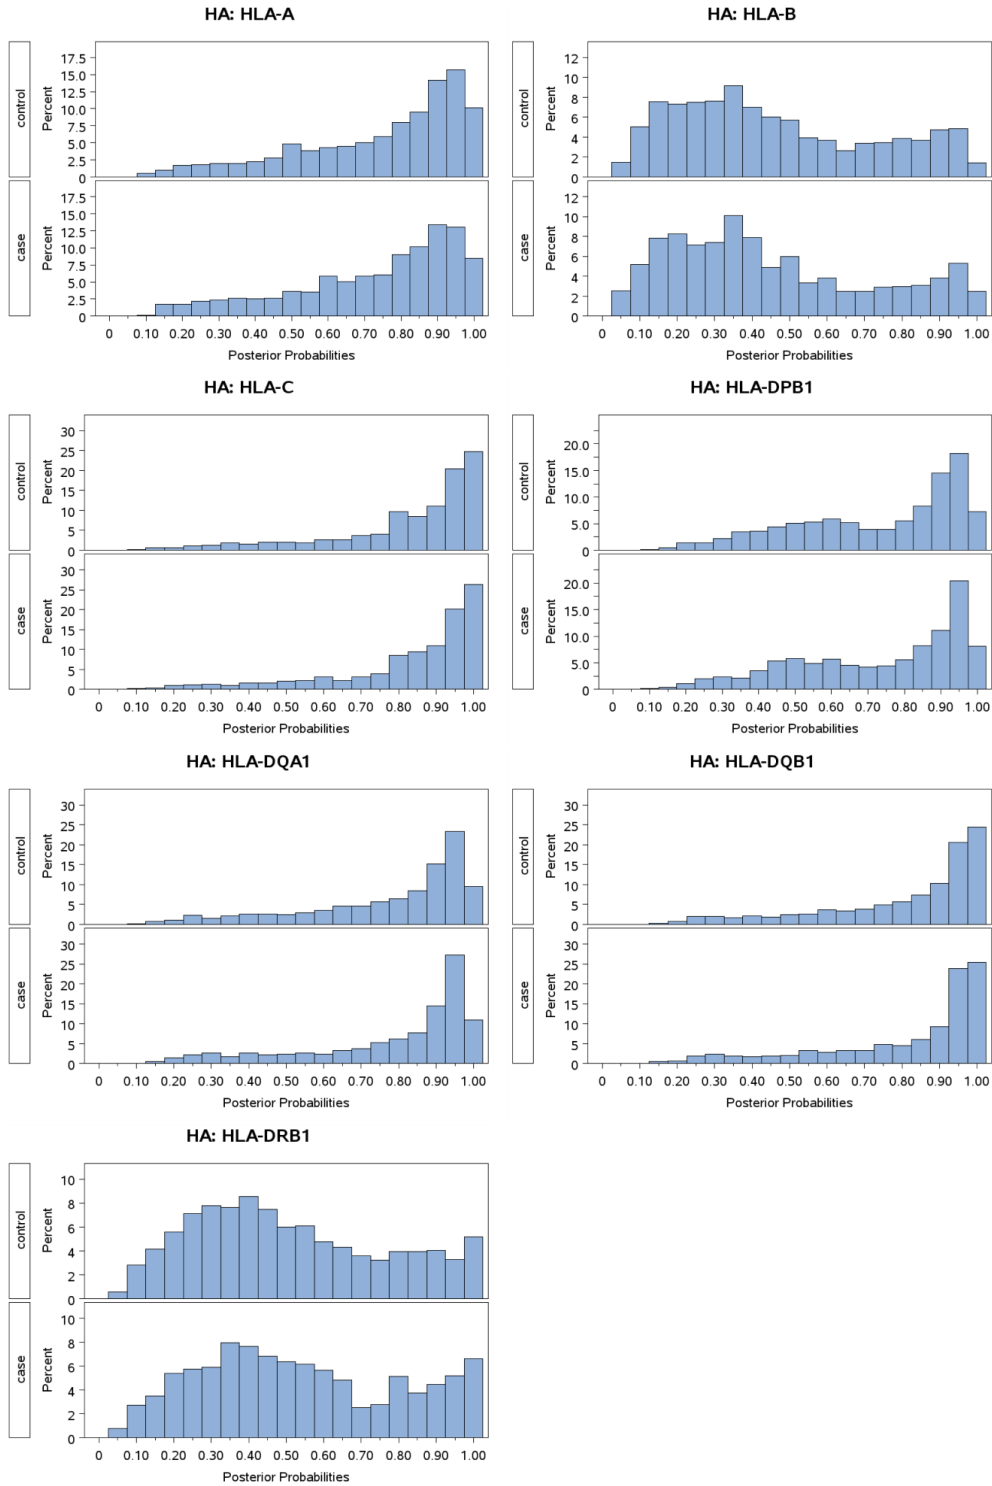

**Supplementary Figure 6. Plots of SNP associations meeting genome-wide significance, post-adjustment for Classical HLA alleles.**

**a. European Ancestry**

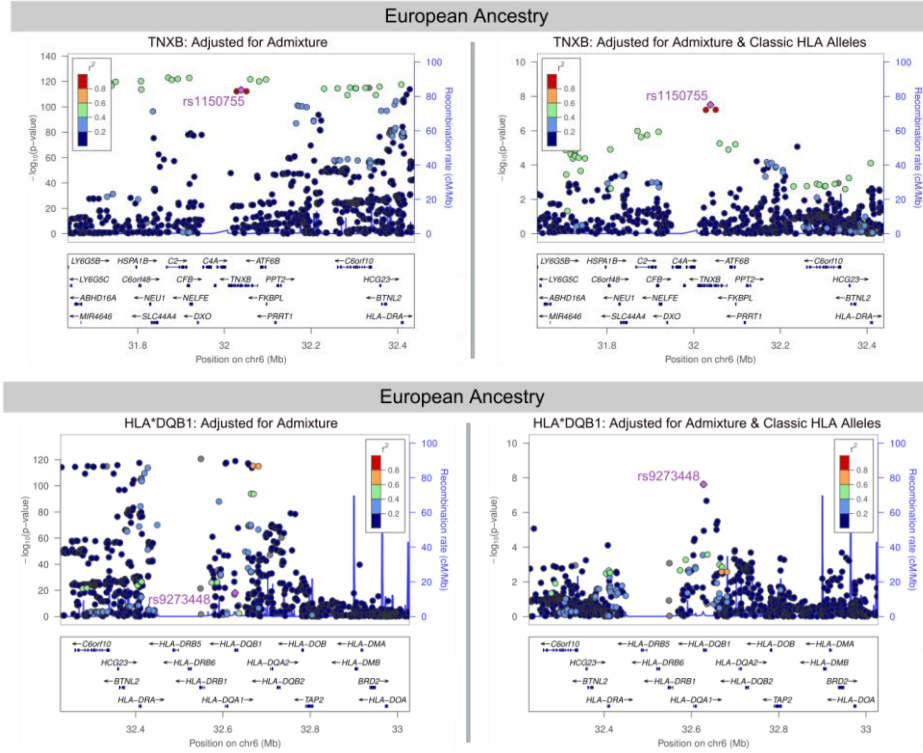

**b. Meta Analysis**

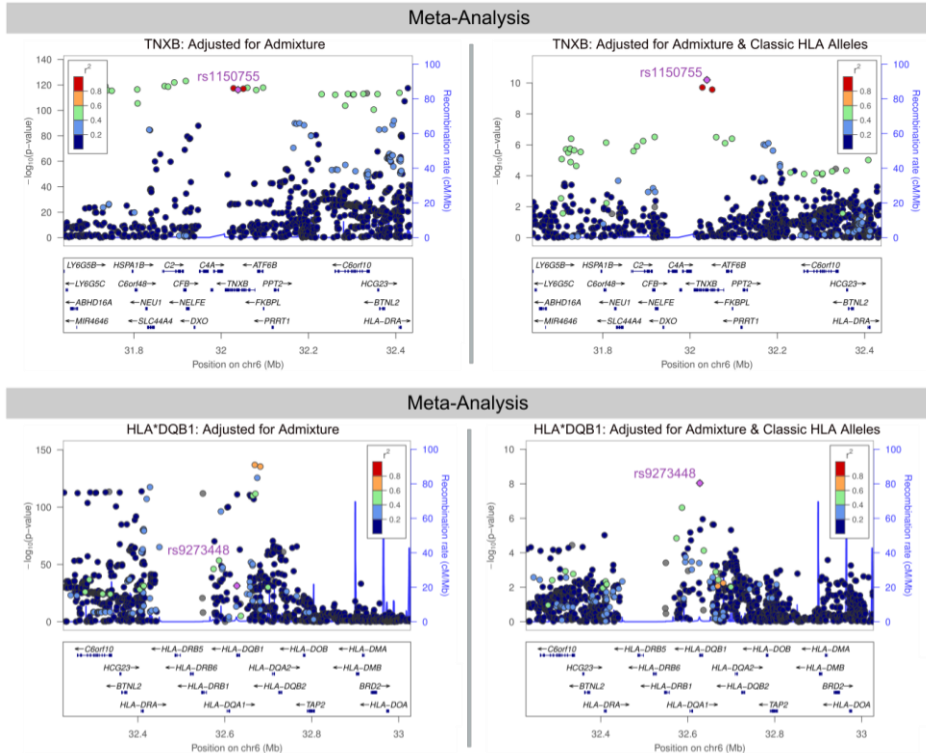

**Supplementary Figure 7. Clustering of HLA alleles by amino acid sequence similarity.** For each HLA gene, the odds ratios for each cohort are overlain if the SLE association p-value was less than 0.01. Alleles that were present in the multi-locus model from the stepwise procedure are also denoted. This process aims to identify clusters with shared SLE risk or not-risk odds ratios across the three cohorts. Such clusters help identify potential amino acid sequences contributing to SLE risk.

a. HLA-A

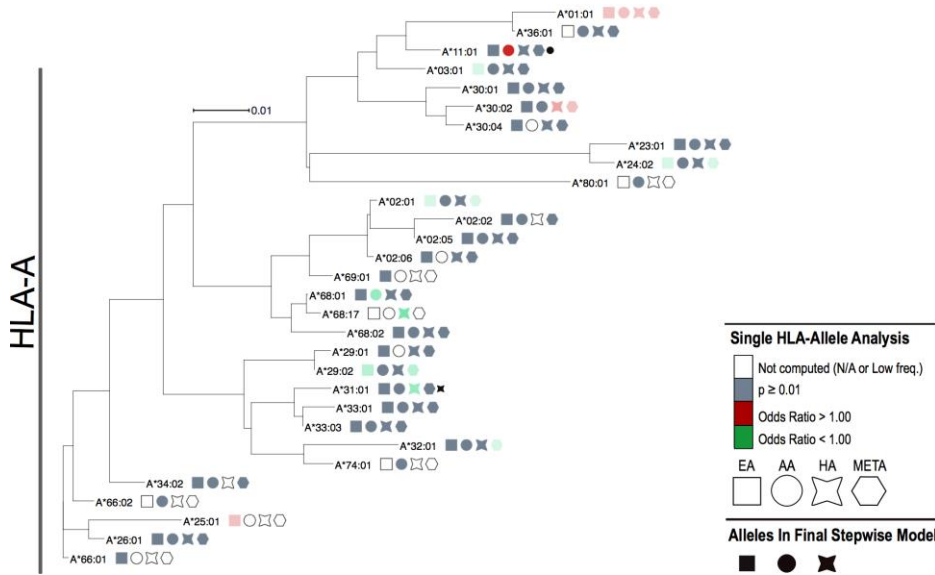

b. HLA-B

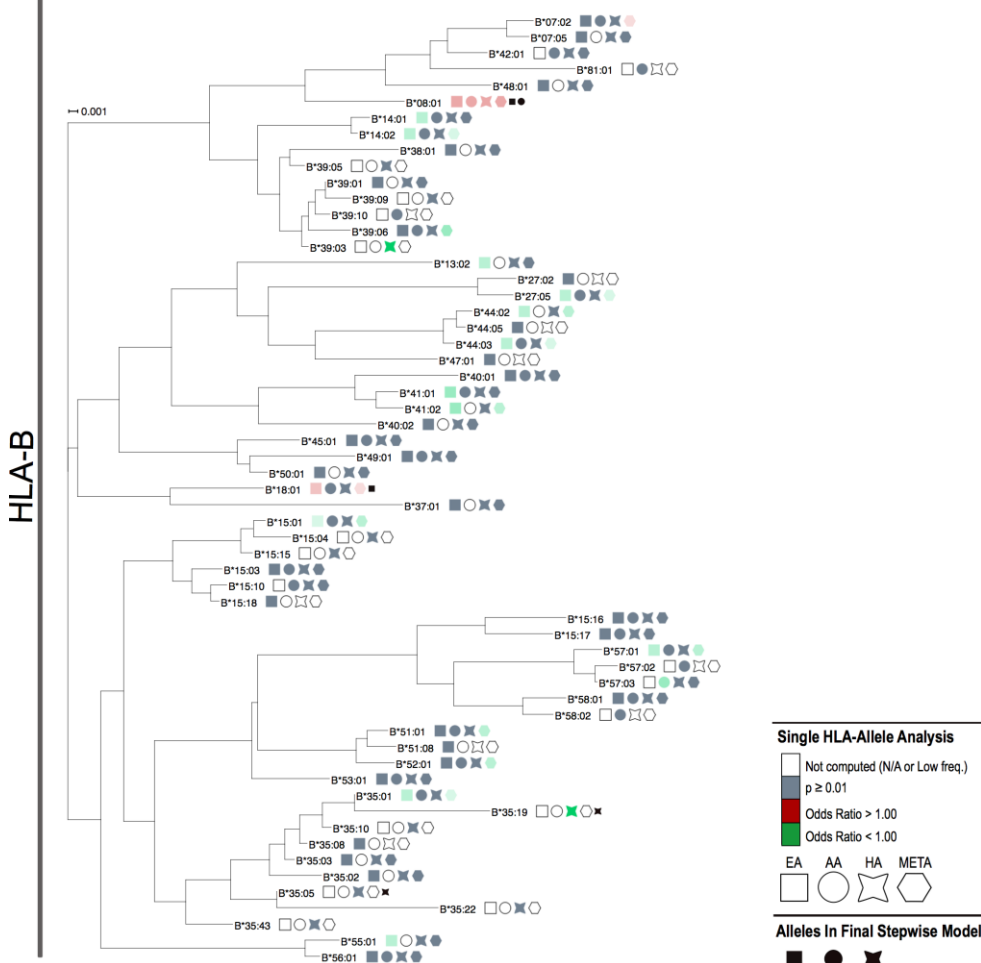

c. HLA-C

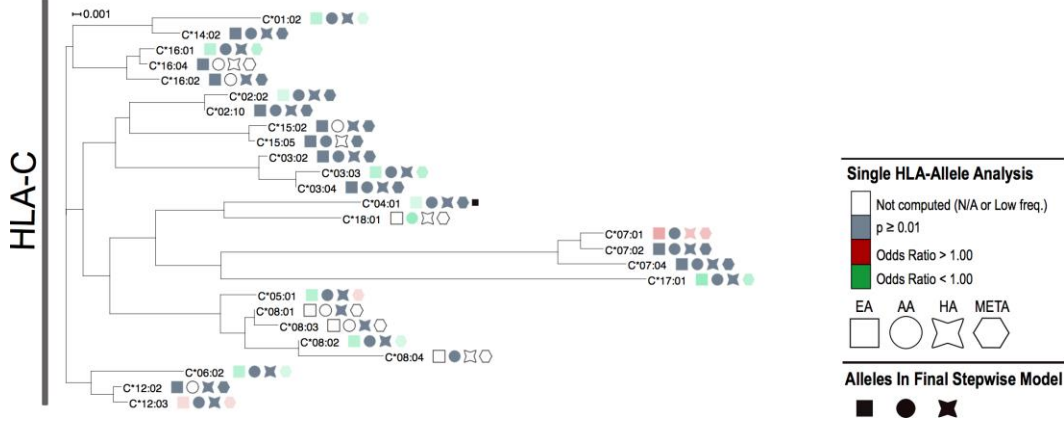

d. HLA-DPB1

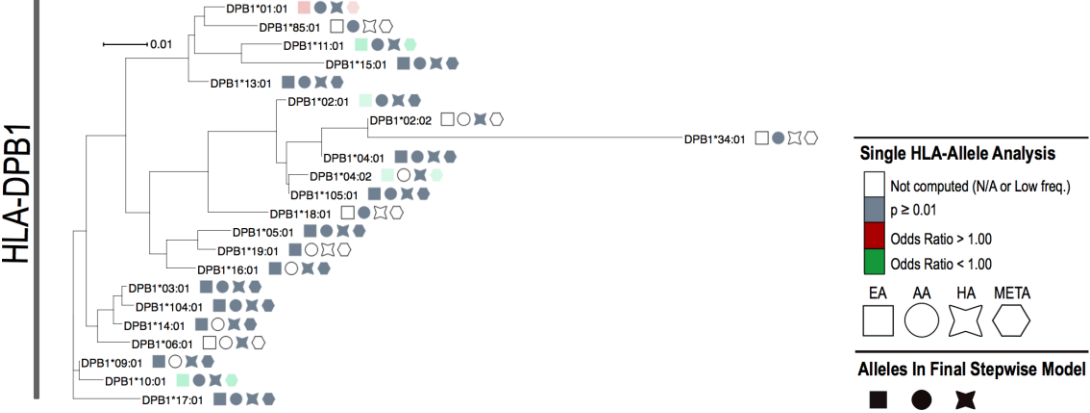

**Supplementary Figure 8. Amino acids within DRB1\*15 SLE risk cluster.** (a) Multiple sequence alignment performed by CLUSTAL-omega of HLA-DRB1 alleles with a Percent Identity score of at least 95 with HLA-DRB1\*15:01 or 15:03, two alleles associated with SLE risk in at least three populations (Figure 3). Numbering begins after signal peptide. Amino acids unique to the two risk alleles (positions -1, 47, and 71) are highlighted in purple. Positions in which the two risk alleles share an amino acid with less than half of the non-risk peptides in this cluster are highlighted in green. (b) Three dimensional ribbon model of HLA-DR protein. This structure is based on Protein Data Bank entry 3pdo. Amino acid positions noted in (a) are highlighted in red. (c) An enlarged view of the HLA-DR $\beta$  subunit, rotated for another view of noted amino acids in binding pocket.

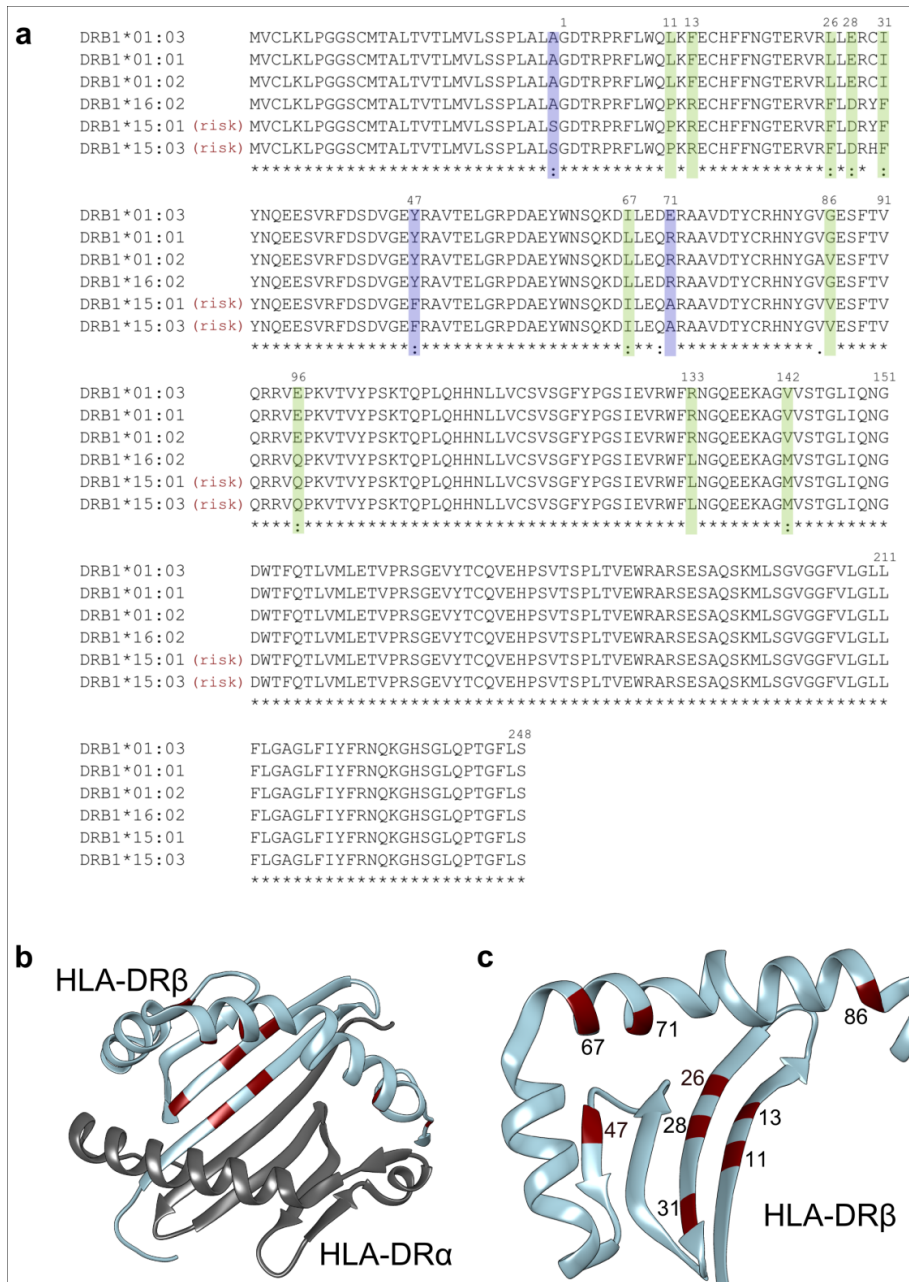

**Supplementary Figure 9. Three dimensional ribbon model of classical HLA alleles.** Three dimensional ribbon model of classical HLA alleles representative of binding-pocket amino acids that distinguish among risk and non-risk alleles in the DRB1\*01; 16; 15 cluster (Figure 3a, Supplementary figure 10.) Non-polar, hydrophobic Phe47 Ala71 (Pocket 7) residues are unique to the two risk alleles (DRB1\*15:01 and 15:03) within this cluster. Contrastingly, the non-risk alleles (DRB1\*01:03, 01:01, 01:02, 16:02) exhibit a polar Tyr47 and either a polar Arg71 or polar Glu71. Focusing on amino acids sequences with at least 95% identity, allows for the ability to isolate potential regions of biochemical influence on SLE risk. In this case, SLE risk alleles DRB1\*15:01 and 15:03 are unique from non-risk alleles via a hydrophobic space in DRB1 pocket 7. Proteins were modeled with SWISS-MODEL using Protein Data Bank Entry 3pdo.1.B as the template. 3-D visualizations were created via Chimera.

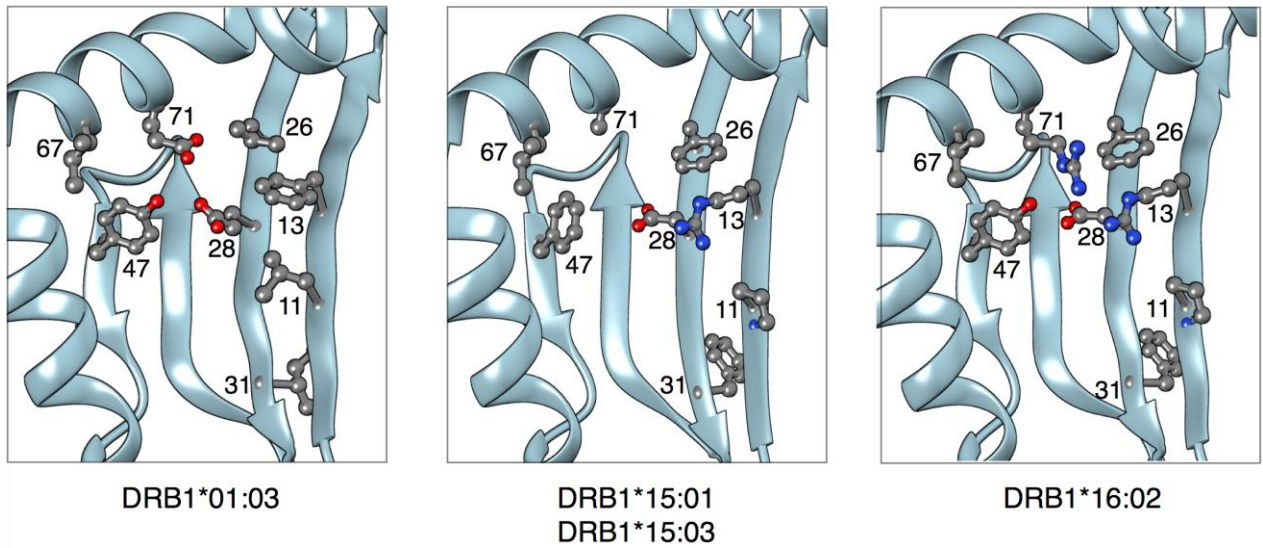

**Supplementary Figure 10. DRB1\*03 cluster sequence alignment.** (a) Multiple sequence alignment performed by CLUSTAL-omega of HLA-DRB1 alleles with a Percent Identity score of at least 95 with SLE risk allele, HLA-DRB1\*03:01. Numbering begins after signal peptide. DRB1\*03:01 uniquely holds a polar Tyr26, compared to the non-polar Phe26 of the non-risk alleles within this cluster. Positions in which the risk allele shared an amino acid with 50% or less of the non-risk peptides in this cluster are highlighted in green. Most of these amino acids spanned the designated 'Shared Epitope Region'. (b) Three-dimensional representation of the DR and DRB1 protein. Amino acids of interest from the sequence alignment are highlighted in the models which were created using Chimera.

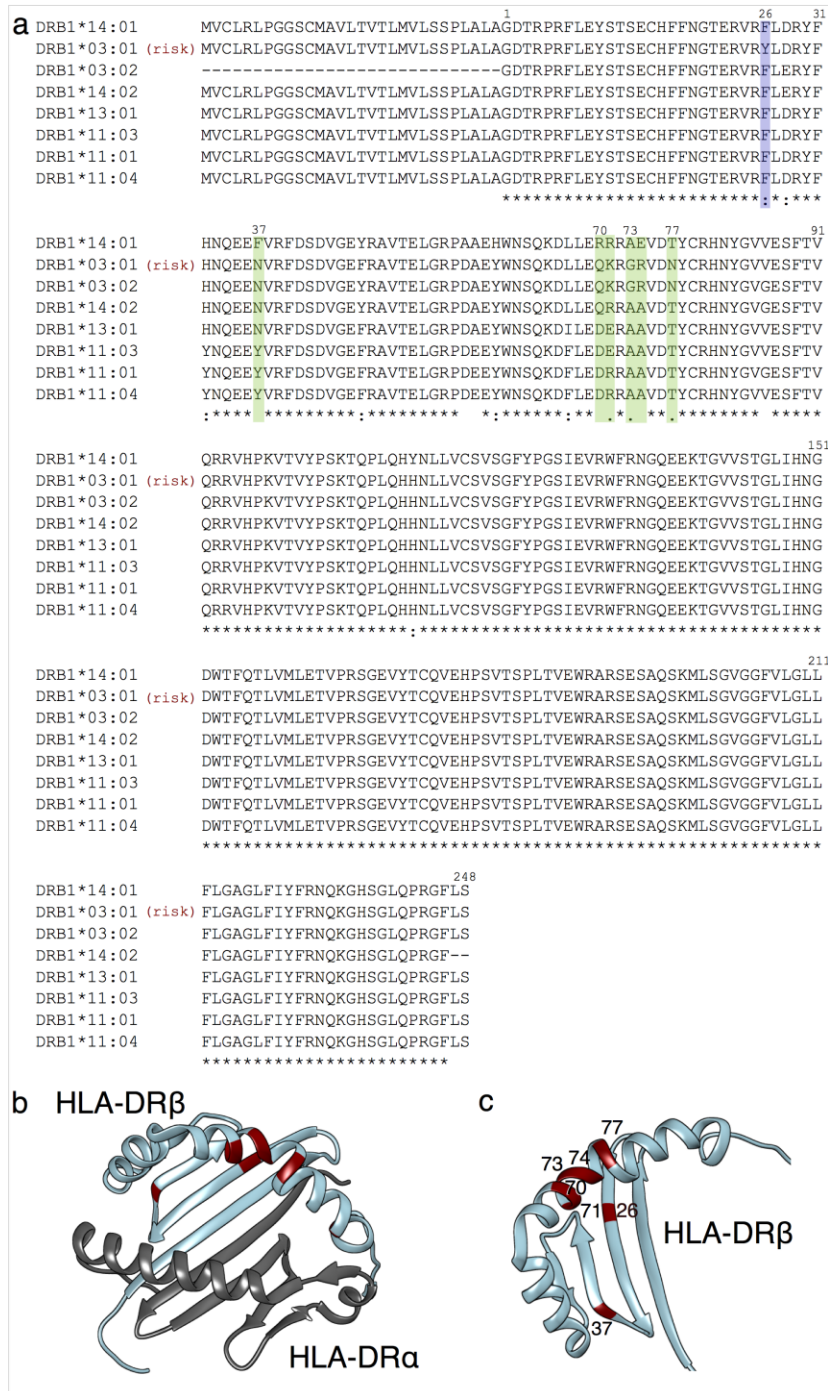

**Supplementary Figure 11. Sequence Alignment of DQA1\*01 cluster.** Sequence alignment comparing SLE risk allele DQA1\*01:02 to non-risk alleles with 95% sequence identity (DQA1\*01:03, \*01:01, \*01:04, and \*01:05). Met207 is the only amino acid unique to risk allele DQA1\*01:02 from it's non-risk neighbors. Positions in which the risk allele shared an amino acid with 50% or less of the non-risk peptides in this cluster are highlighted in green (Gln34).

```

DQA1*01:03      MILNKALLLGALALTTVMSPCGGEDIVADHVASC1GVNLYQFYGPSGQF34THEFDGDE37QFYV
DQA1*01:02 (risk) MILNKALLLGALALTTVMSPCGGEDIVADHVASC1GVNLYQFYGPSGQY34THEFDGDE37QFYV
DQA1*01:01      MILNKALLLGALALTTVMSPCGGEDIVADHVASC1GVNLYQFYGPSGQY34THEFDGDEEFYV
DQA1*01:04      MILNKALLLGALALTTMSPCGGEGIVADHVASC1GVNLYQFYGPSGQY34THEFDGDEEFYV
DQA1*01:05      MILNKALLLGALALTTMSPCGGEGIVADHVASC1GVNLYQFYGPSGQY34THEFDGDEEFYV
*****:*****

DQA1*01:03      DLEKKETAWRWPEFSKFGGFD97PQGALRNMAVAKHNLNIMIKRYNSTAATNEVPEVTVFSK
DQA1*01:02 (risk) DLERKETAWRWPEFSKFGGFD97PQGALRNMAVAKHNLNIMIKRYNSTAATNEVPEVTVFSK
DQA1*01:01      DLERKETAWRWPEFSKFGGFD97PQGALRNMAVAKHNLNIMIKRYNSTAATNEVPEVTVFSK
DQA1*01:04      DLERKETAWRWPEFSKFGGFD97PQGALRNMAVAKHNLNIMIKRYNSTAATNEVPEVTVFSK
DQA1*01:05      DLERKETAWRWPEFSKFGGFD97PQGALRNMAVAKHNLNIMIKRYNSTAATNEVPEVTVFSK
***:*****

DQA1*01:03      SPVTLGQPNTLICLV157DNIFPPVVNITWLSNGHAVTEGVSETSF157LSKSDHSFFKISYLTFL
DQA1*01:02 (risk) SPVTLGQPNTLICLV157DNIFPPVVNITWLSNGQSVTEGVSETSF157LSKSDHSFFKISYLTFL
DQA1*01:01      SPVTLGQPNTLICLV157DNIFPPVVNITWLSNGQSVTEGVSETSF157LSKSDHSFFKISYLTFL
DQA1*01:04      SPVTLGQPNTLICLV157DNIFPPVVNITWLSNGQSVTEGVSETSF157LSKSDHSFFKISYLTFL
DQA1*01:05      SPVTLGQPNTLICLV157DNIFPPVVNITWLSNGQSVTEGVSETSF157LSKSDHSFFKISYLTFL
*****:*****

DQA1*01:03      PSAD207EIDCKVEHWGLDQPLLKHWEPEIPAPMSEL217TETVVCALGLSVGLVGI217VVGTVFII
DQA1*01:02 (risk) PSAD207EIDCKVEHWGLDQPLLKHWEPEIPAPMSEL217TETVVCALGLSVGLMGI217VVGTVFII
DQA1*01:01      PSAD207EIDCKVEHWGLDQPLLKHWEPEIPAPMSEL217TETVVCALGLSVGLVGI217VVGTVFII
DQA1*01:04      PSAD207EIDCKVEHWGLDQPLLKHWEPEIPAPMSEL217TETVVCALGLSVGLVGI217VVGTVFII
DQA1*01:05      PSAD207EIDCKVEHWGLDQPLLKHWEPEIPAPMSEL217TETVVCALGLSVGLVGI217VVGTVFII
*****:*****

DQA1*01:03      QGLR217SVGASRHQG217PL
DQA1*01:02 (risk) QGLR217SVGASRHQG217PL
DQA1*01:01      QGLR217SVGASRHQG217PL
DQA1*01:04      QGLR217SVGASRHQG217PL
DQA1*01:05      QGLR217SVGASRHQG217PL
*****

```



**Supplementary Figure 12. Sequence alignment of DQA1\*05 cluster.** Sequence alignment comparing SLE risk allele DQA1\*05:01 to non-risk alleles with 95% sequence identity (DQA1\*05:05 and \*05:03). Thr-13 and Ala159 are the only differences among these three alleles are highlighted below.

```

DQA1*05:05      MILNKALMLG-13T1LALTTVMSPCGGEDIVADHVASYGVNLYQSYGPSGQYTHEFDGDEQFYV37
DQA1*05:03      MILNKALMLGALALTTVMSPCGGEDIVADHVASYGVNLYQSYGPSGQYTHEFDGDEQFYV
DQA1*05:01 (risk) MILNKALMLGALALTTVMSPCGGEDIVADHVASYGVNLYQSYGPSGQYTHEFDGDEQFYV
                  *****:*****

DQA1*05:05      DLGRKETVWCLPVL97RQFRFDPQFALTNI97AVLKHNLNSLIKRSNSTAATNEVPEVTVFSKS
DQA1*05:03      DLGRKETVWCLPVL97RQFRFDPQFALTNI97AVLKHNLNSLIKRSNSTAATNEVPEVTVFSKS
DQA1*05:01 (risk) DLGRKETVWCLPVL97RQFRFDPQFALTNI97AVLKHNLNSLIKRSNSTAATNEVPEVTVFSKS
                  *****

DQA1*05:05      PVTLGQPNILICLVDNIFPPV157VNITWLSNGHSVTEGVSETSFLSKSDHSFFKISYLTLLP
DQA1*05:03      PVTLGQPNILICLVDNIFPPV157VNITWLSNGHSVTEGVSETSFLSKSDHSFFKISYLTLLP
DQA1*05:01 (risk) PVTLGQPNILICLVDNIFPPV157VNITWLSNGHSVTEGVSETSFLSKSDHSFFKISYLTLLP
                  *****

DQA1*05:05      S217A217EESYDCKVEHWGLDKPLLKHWEPEIPAPMSELTETVVCALGLSVGLVGI217VVGTVFIIR
DQA1*05:03      S217SEESYDCKVEHWGLDKPLLKHWEPEIPAPMSELTETVVCALGLSVGLVGI217VVGTVFIIR
DQA1*05:01 (risk) S217A217EESYDCKVEHWGLDKPLLKHWEPEIPAPMSELTETVVCALGLSVGLVGI217VVGTVFIIR
                  *:*****

DQA1*05:05      GLRSVGASRHQGPL
DQA1*05:03      GLRSVGASRHQGPL
DQA1*05:01 (risk) GLRSVGASRHQGPL
                  *****

```

**Supplementary Figure 13.** Plots of novel Tier 1 meta-analysis and transancestral-mapping regions. Plots appear in the order found in Table 3a. Individual plots were created using LocusZoom standalone software (<http://locuszoom.sph.umich.edu/>)

a. IL12RB2

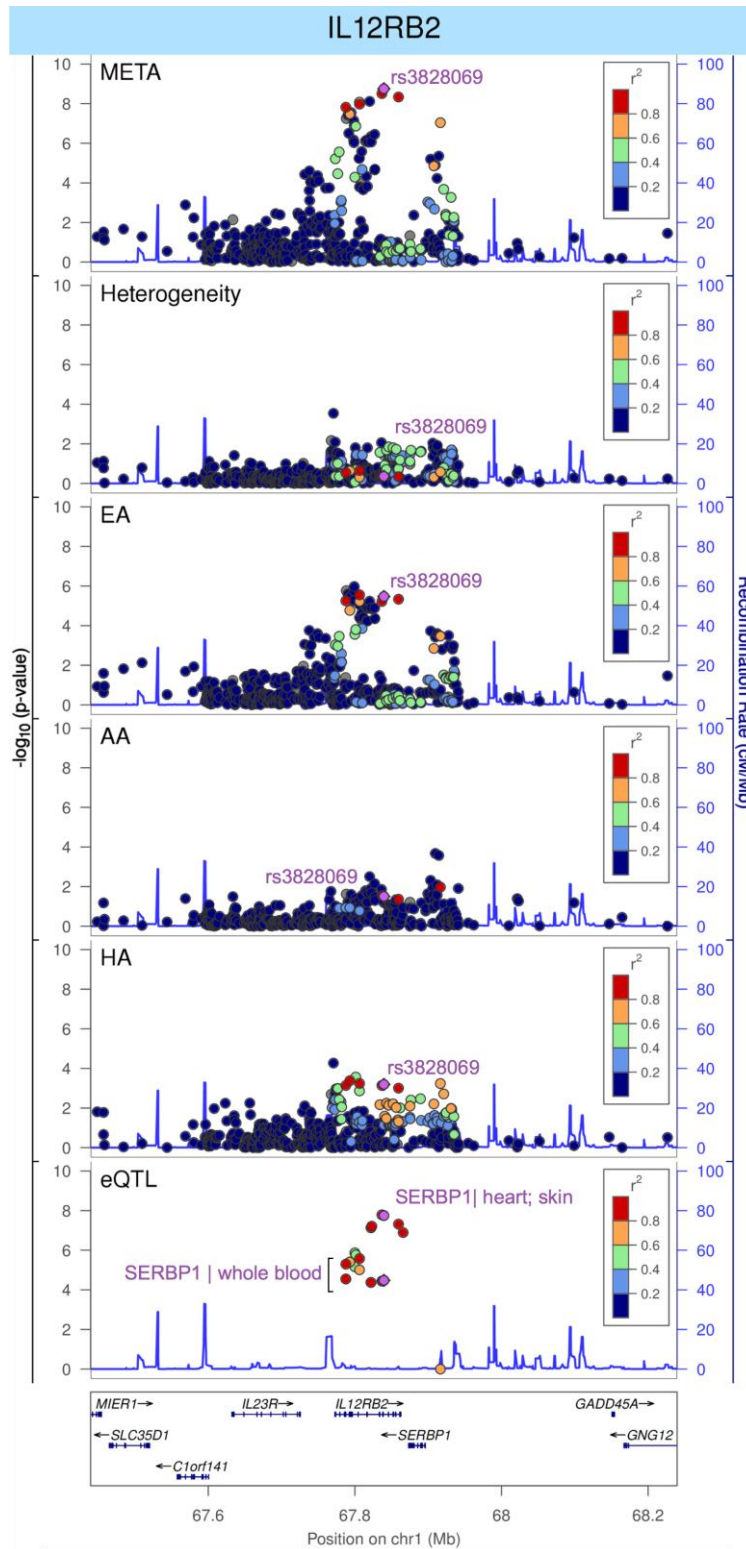

b. PAPOLG-FLJ16341

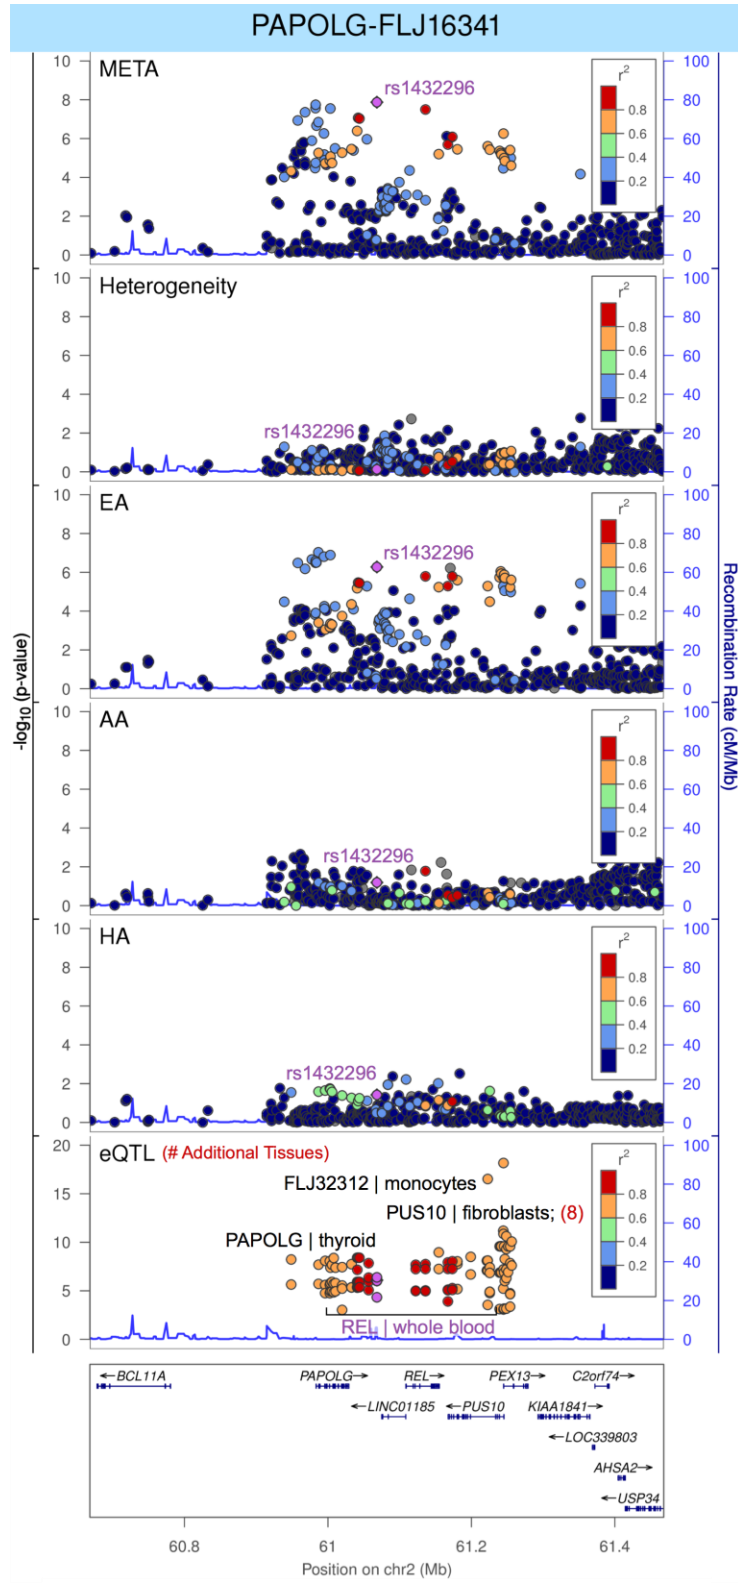

c. DGKQ

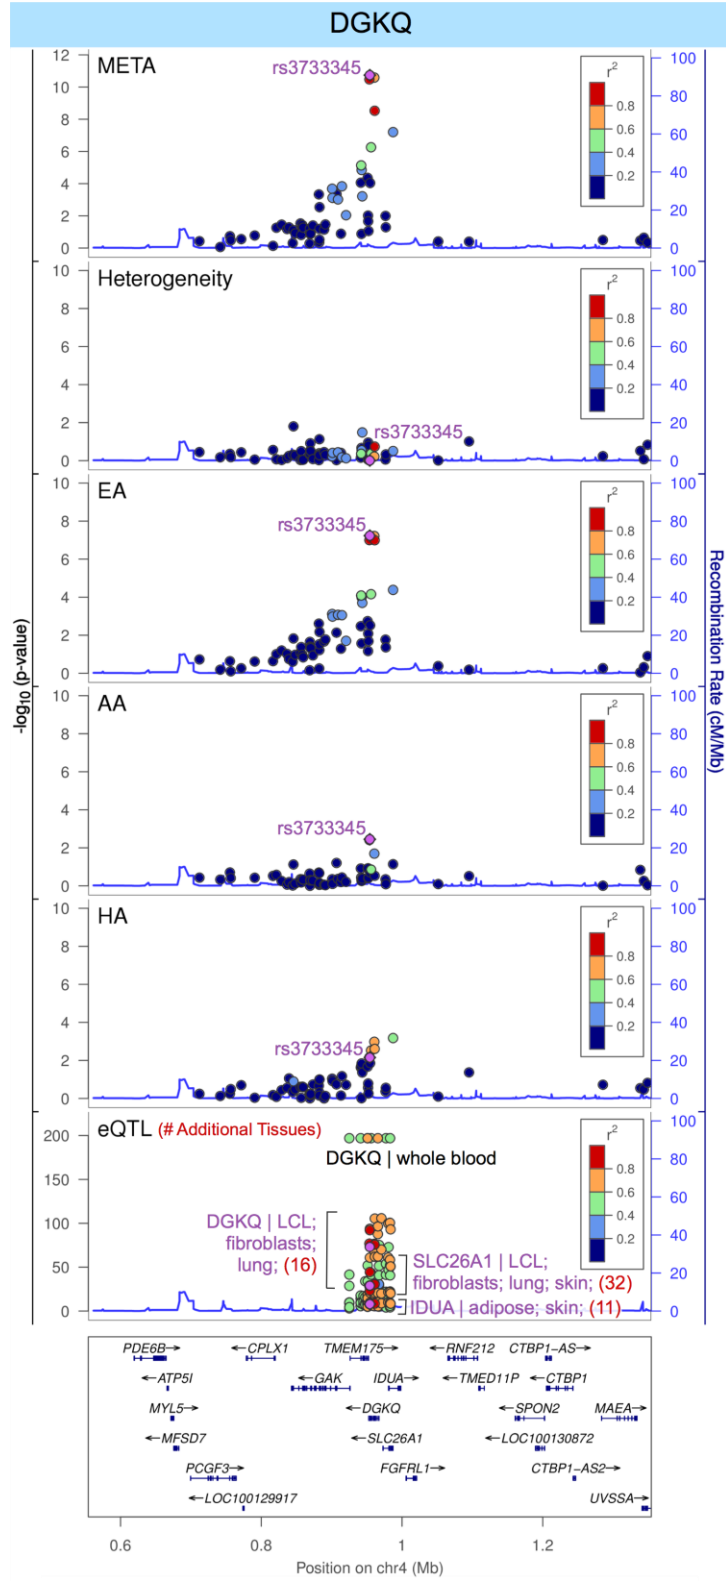

d. ST8SIA4

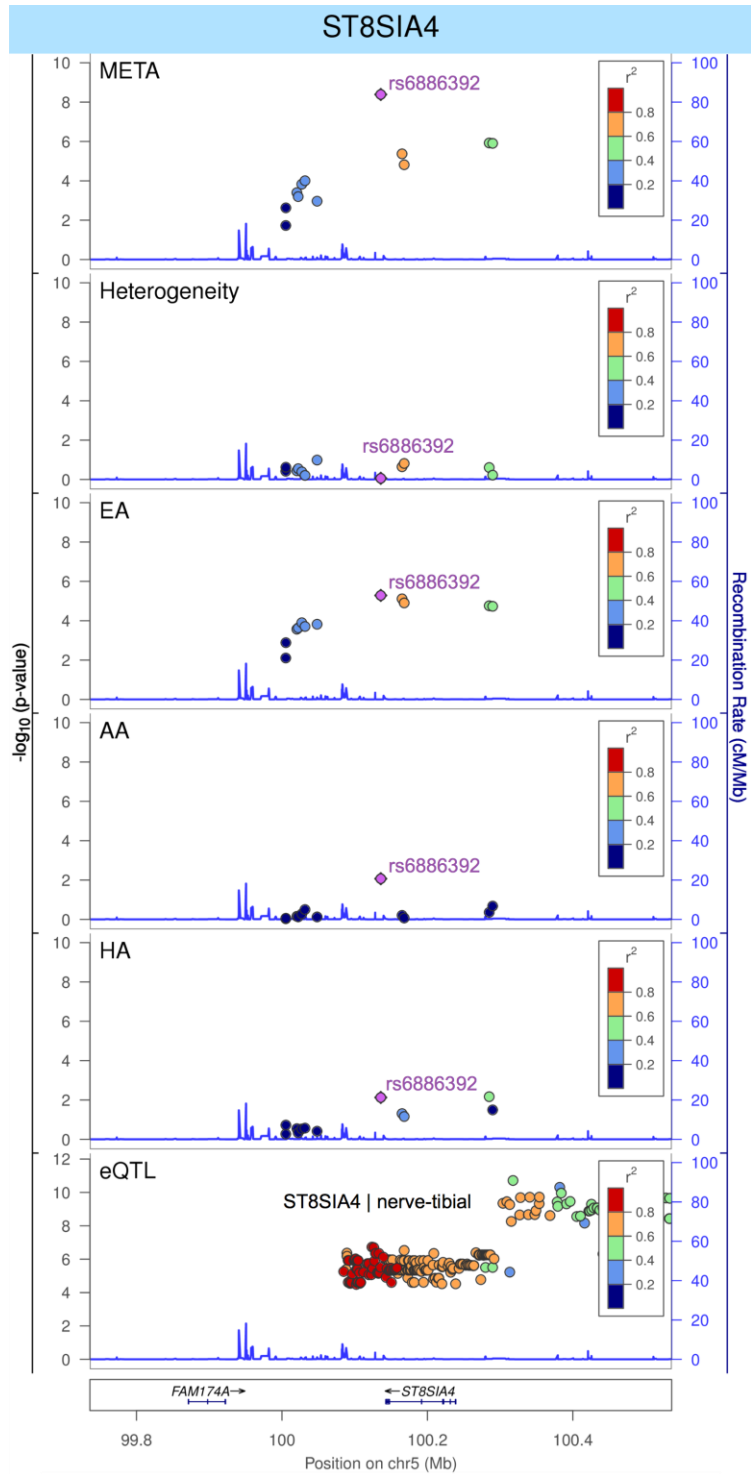

e. UHRF1BP1-SCUBE3-DEF6 (SLE SNP associations adjusted for Classical HLA alleles)

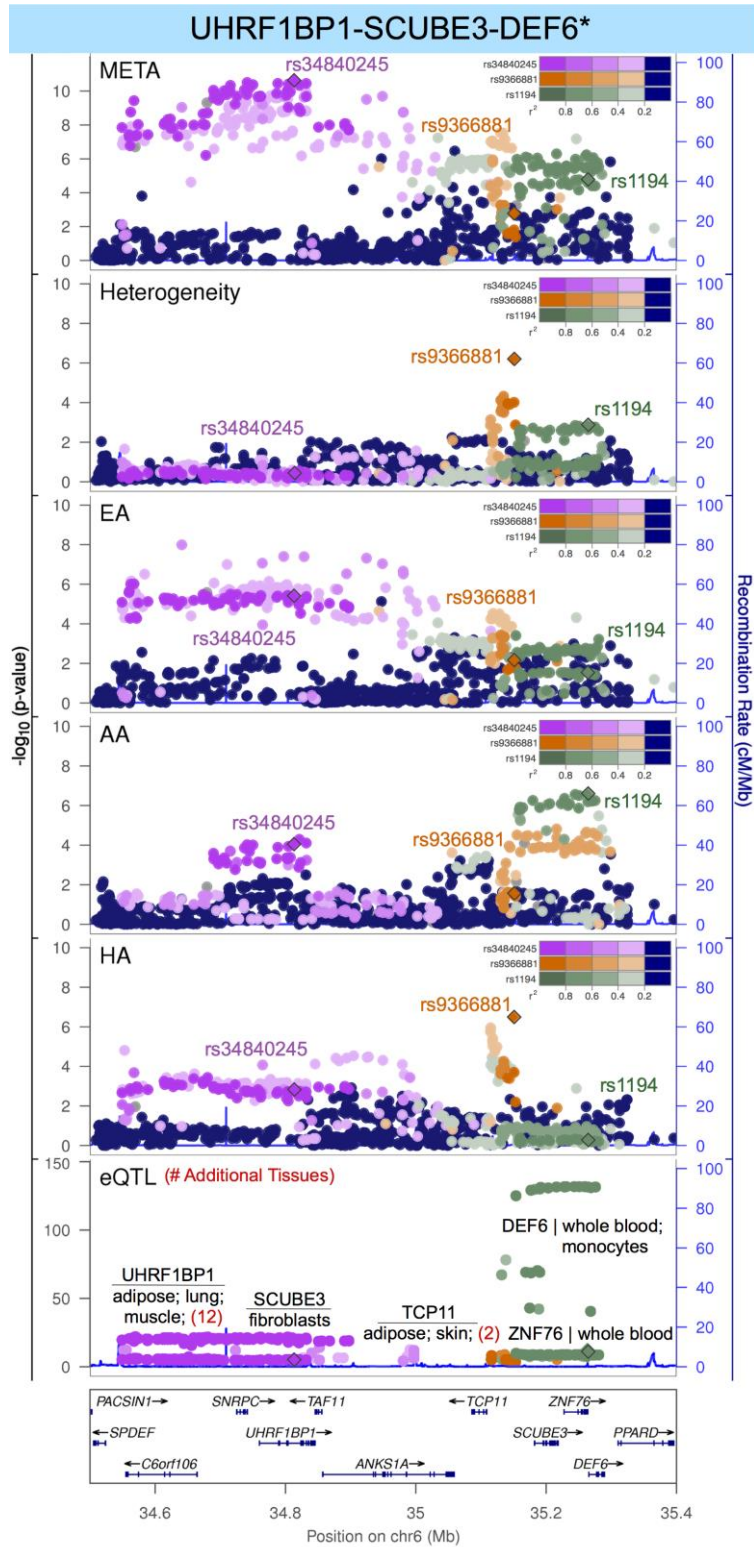

\*SLE SNP associations adjusted for Classic HLA alleles

- f. UHRF1BP1-SCUBE3-DEF6 (SLE SNP associations adjusted for Classical HLA alleles, and top 3 ancestry-specific SNPs: *rs34840245*, *rs9366881*, *rs1194*)

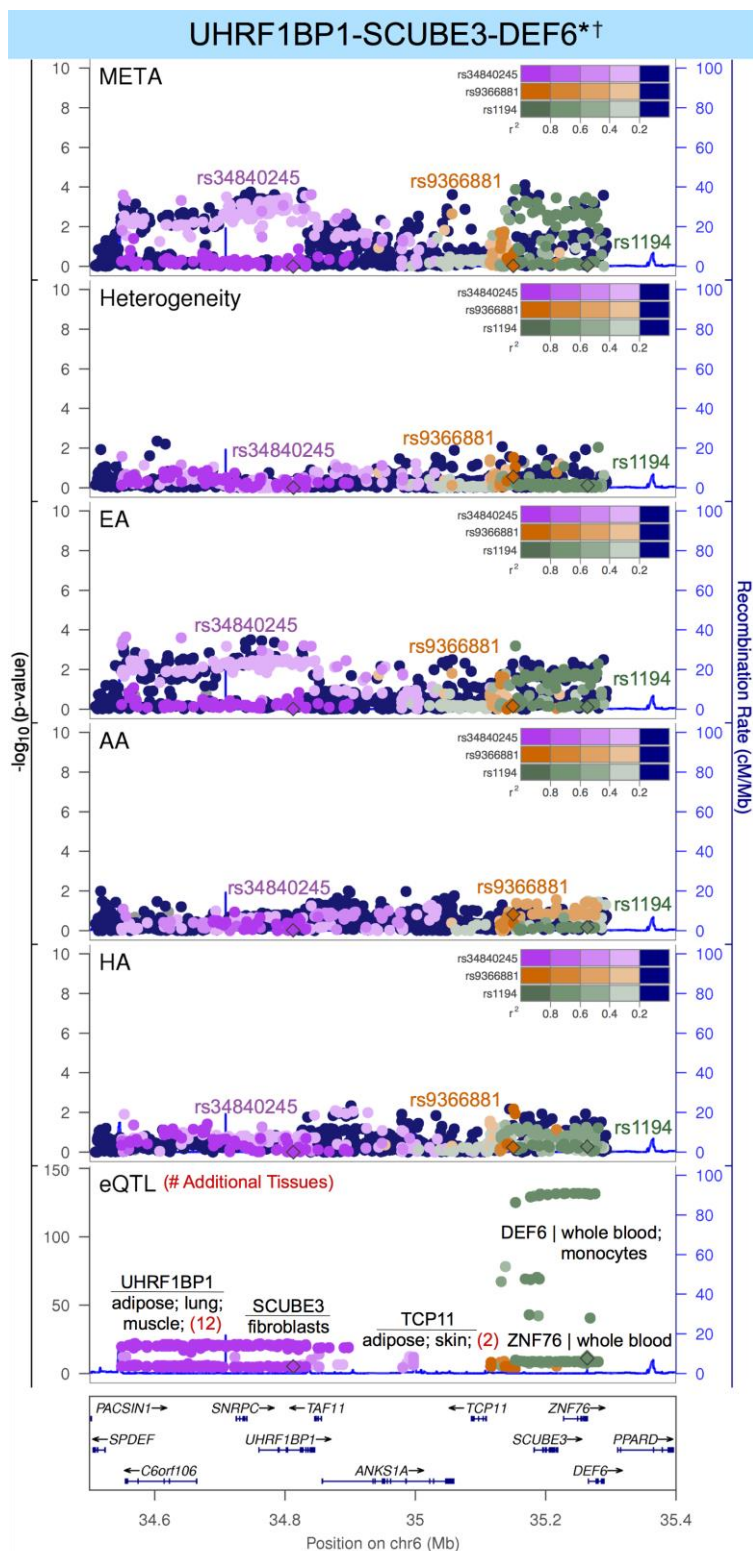

\* SLE SNP associations adjusted for Classic HLA alleles

† Post-adjustment for top 3 SNPs in region: *rs34840245*; *rs9366881*; *rs1194*

g. PKIA-ZC2HC1A

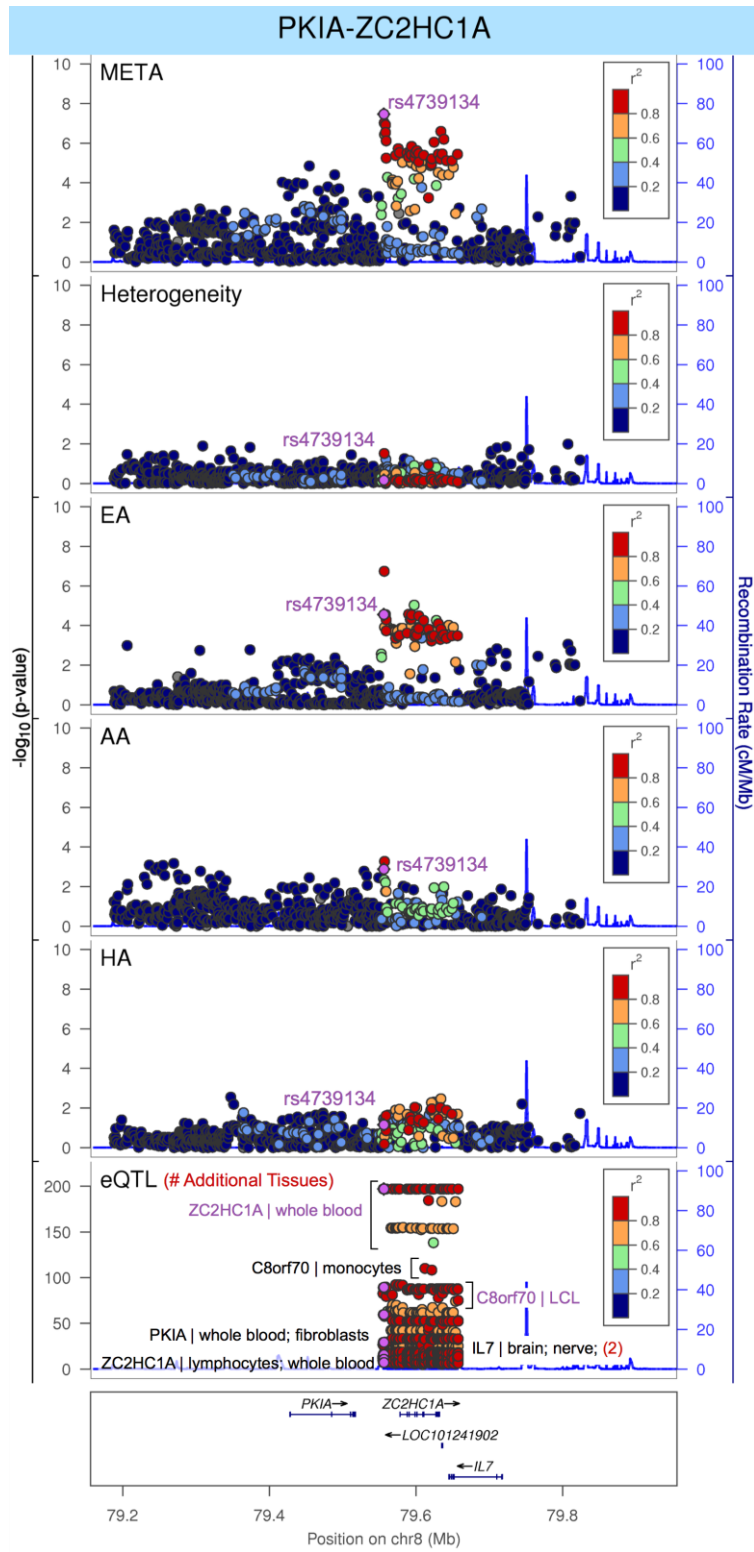



h. AK057451

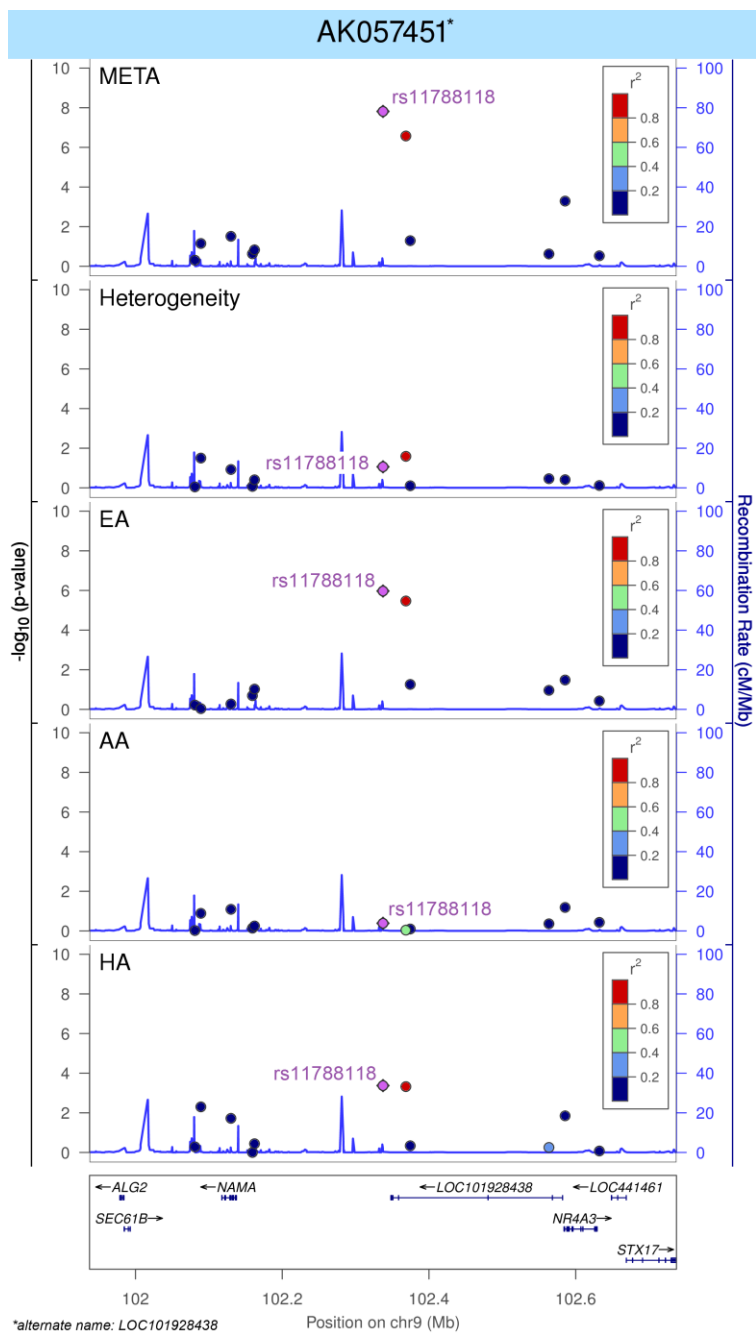

i. ATXN2

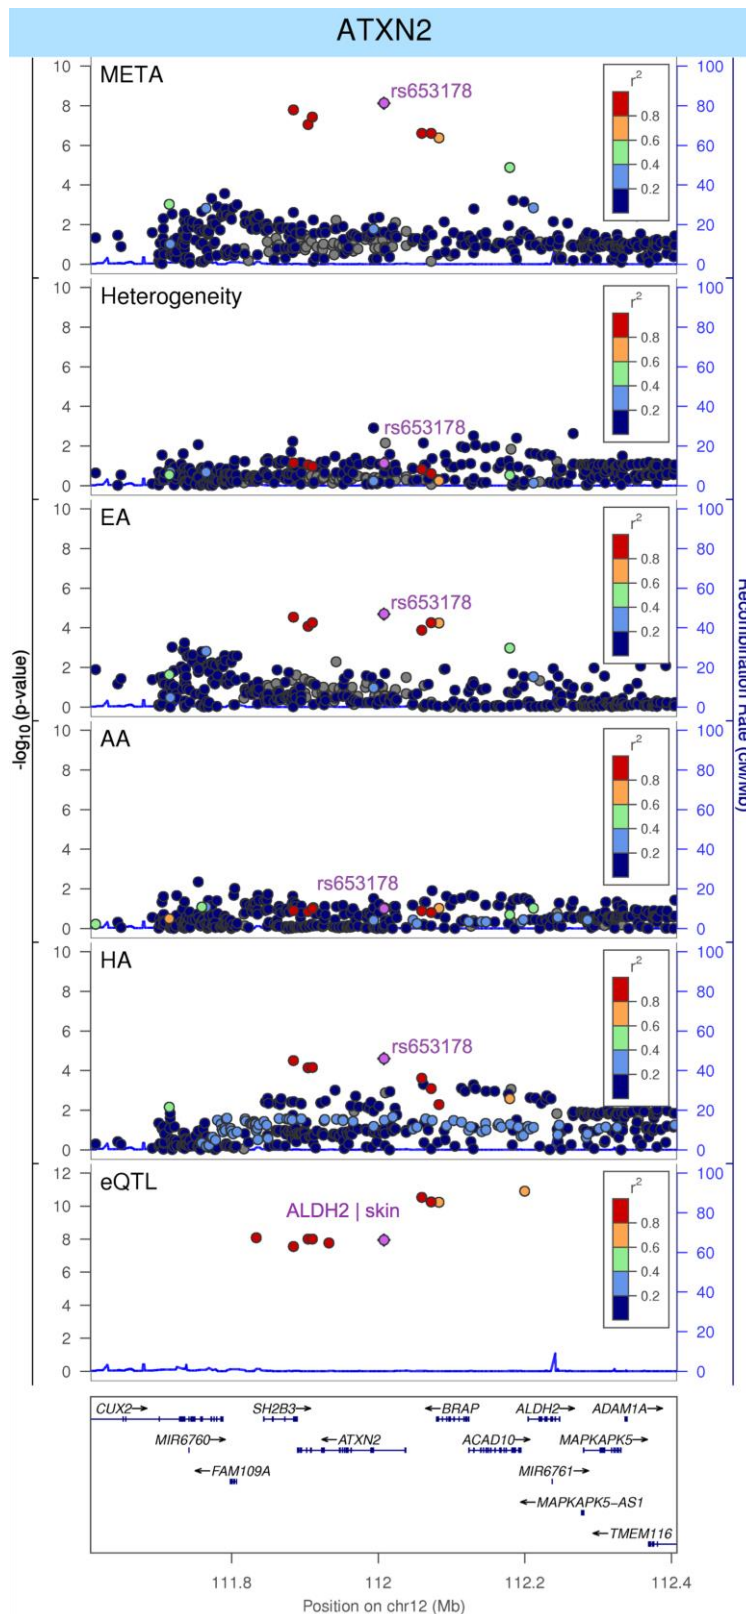

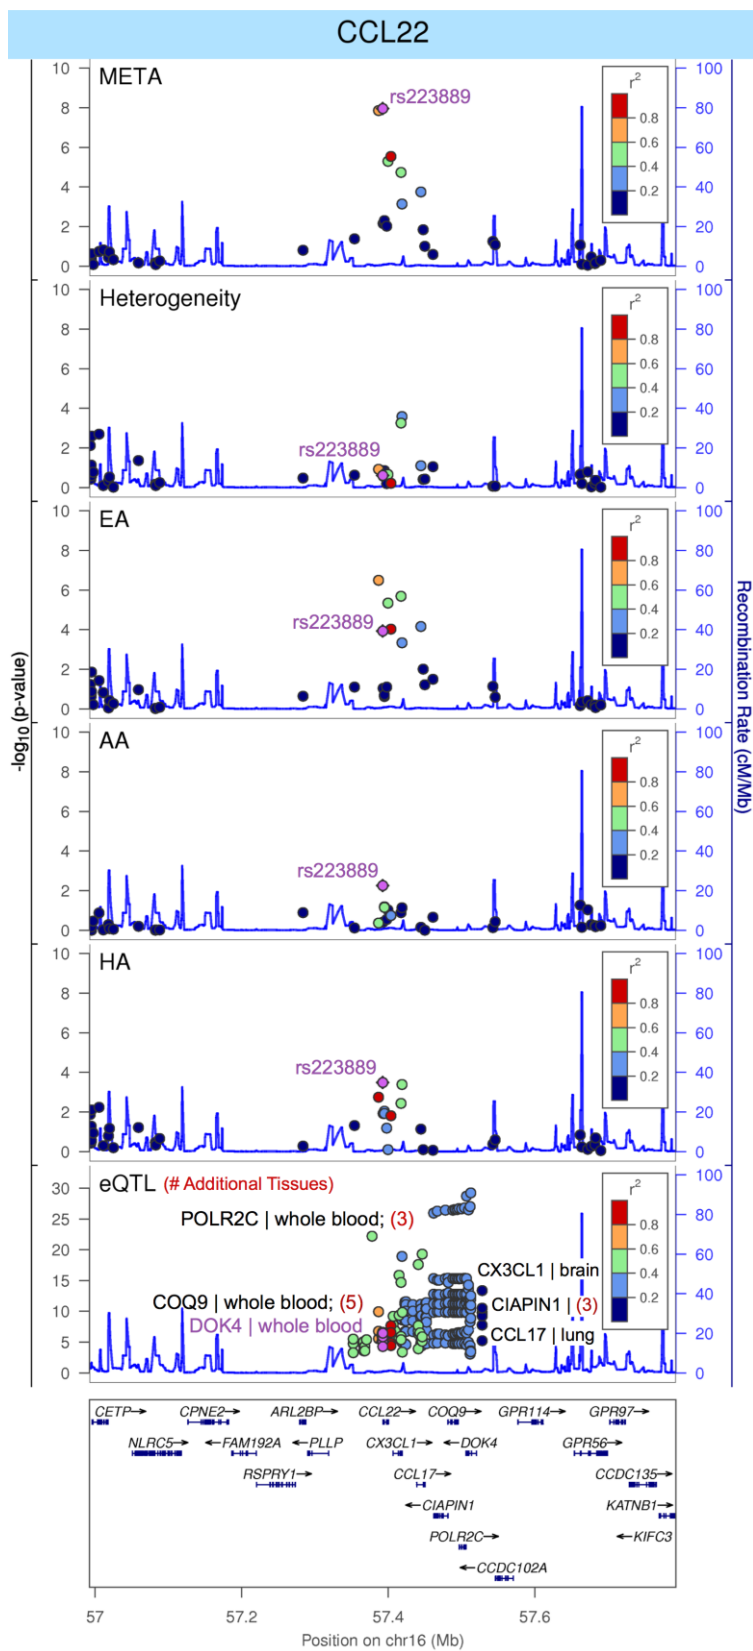

k. CLEC16A

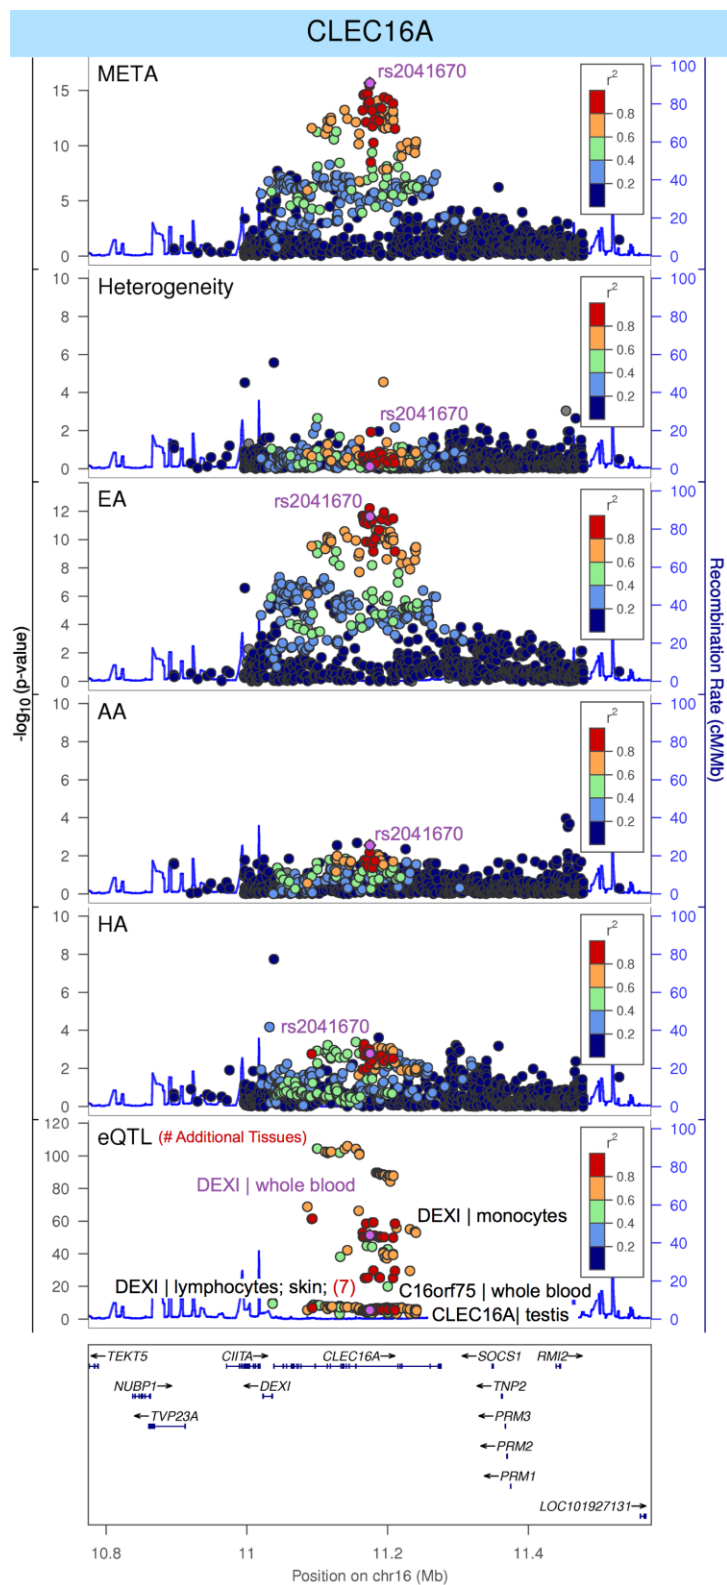

I. ZFP90

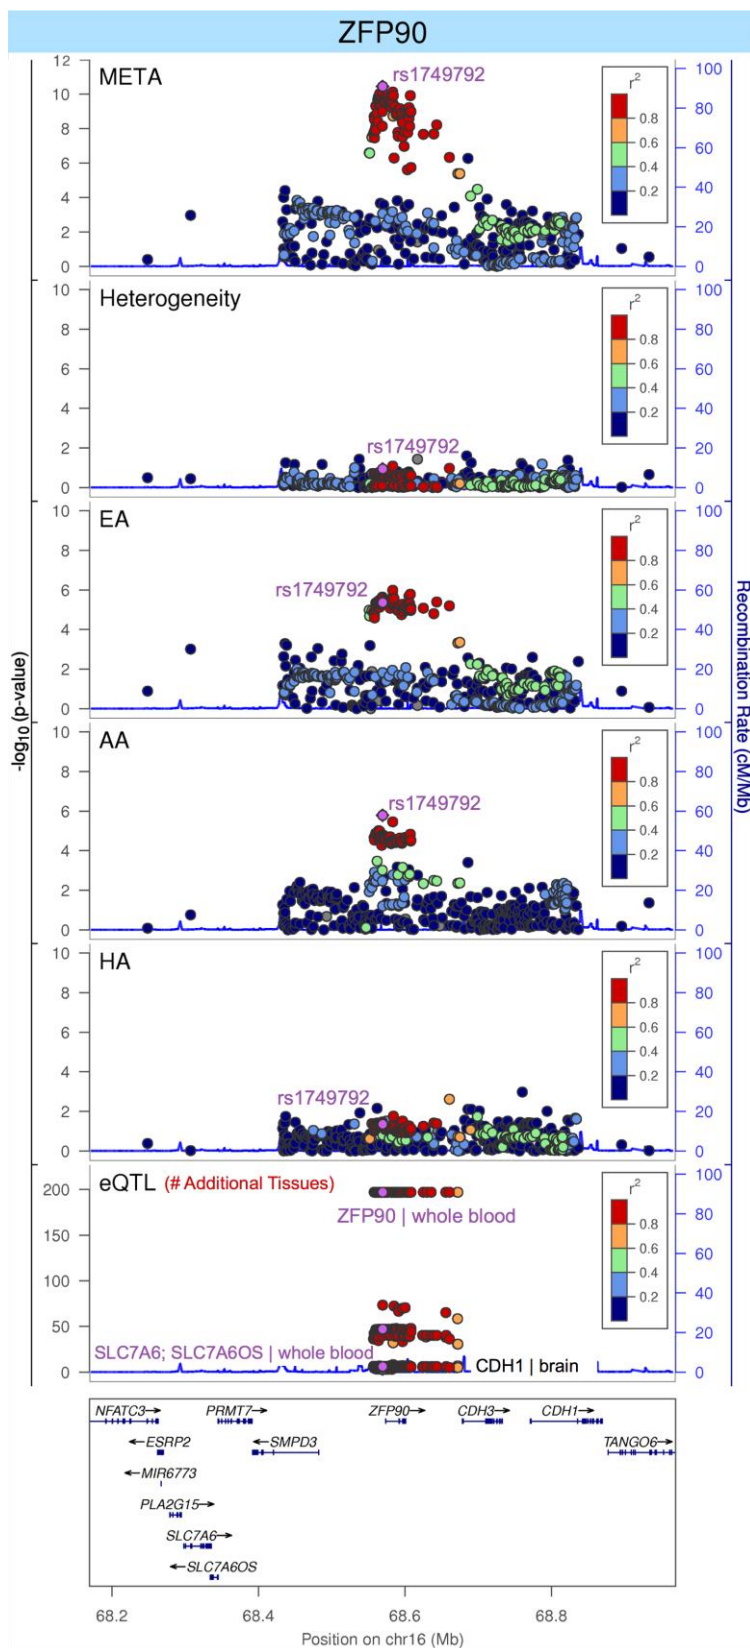

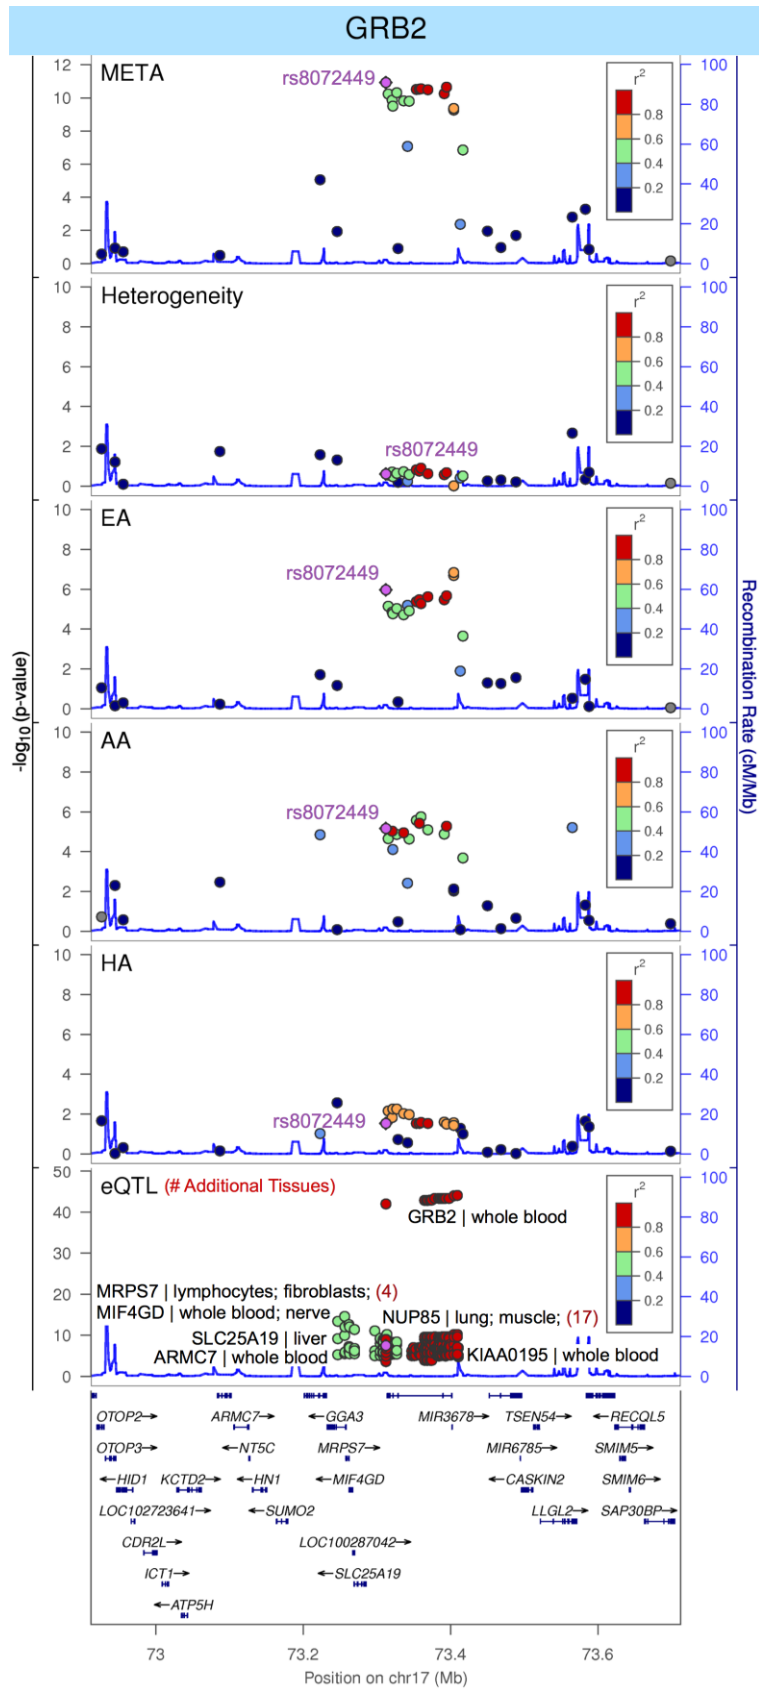

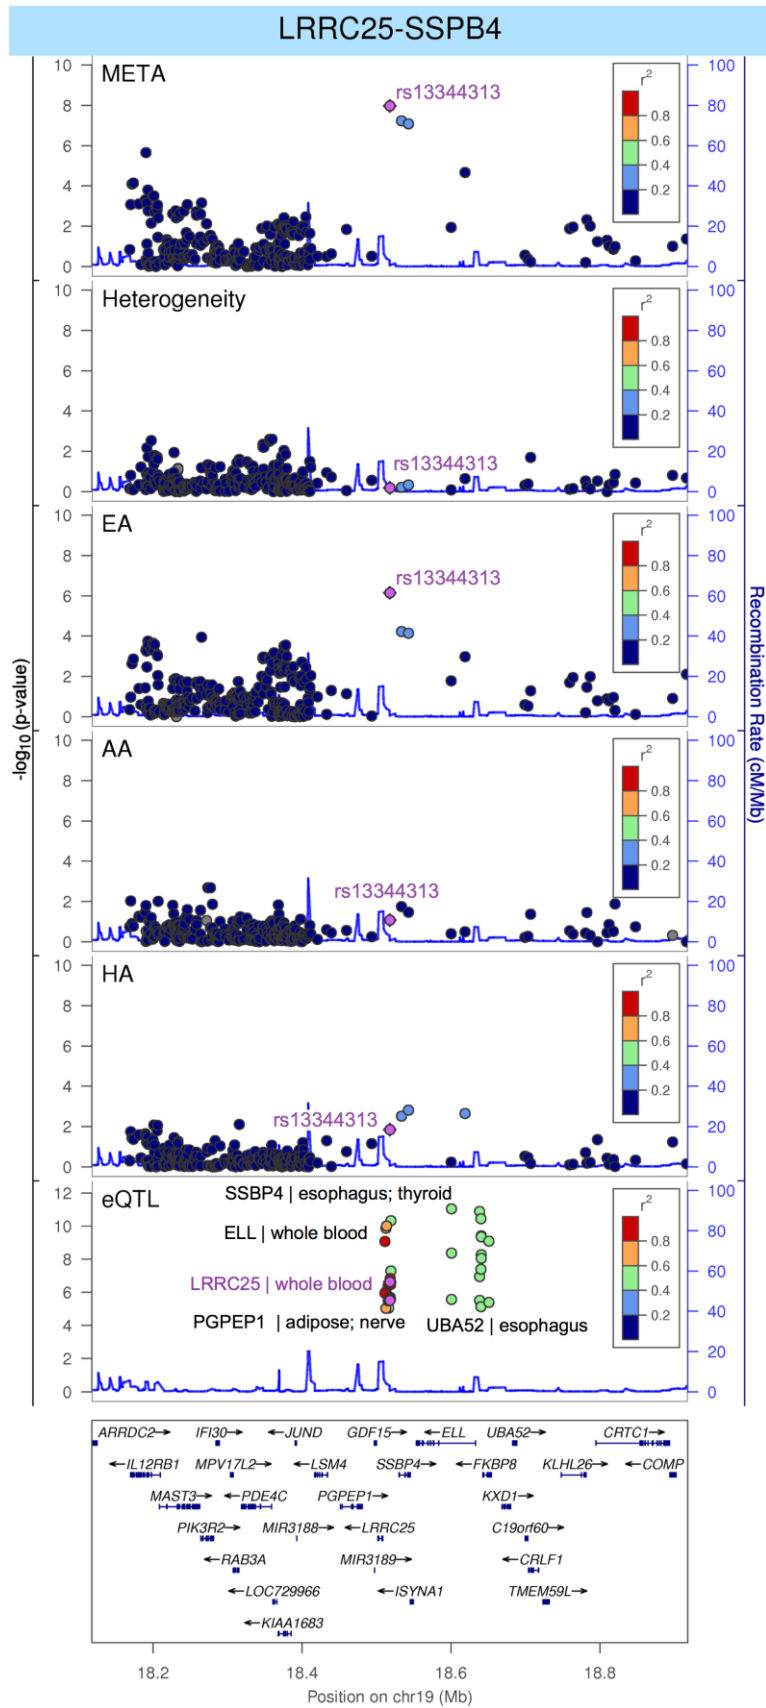

o. PTPRH-TMEM86B

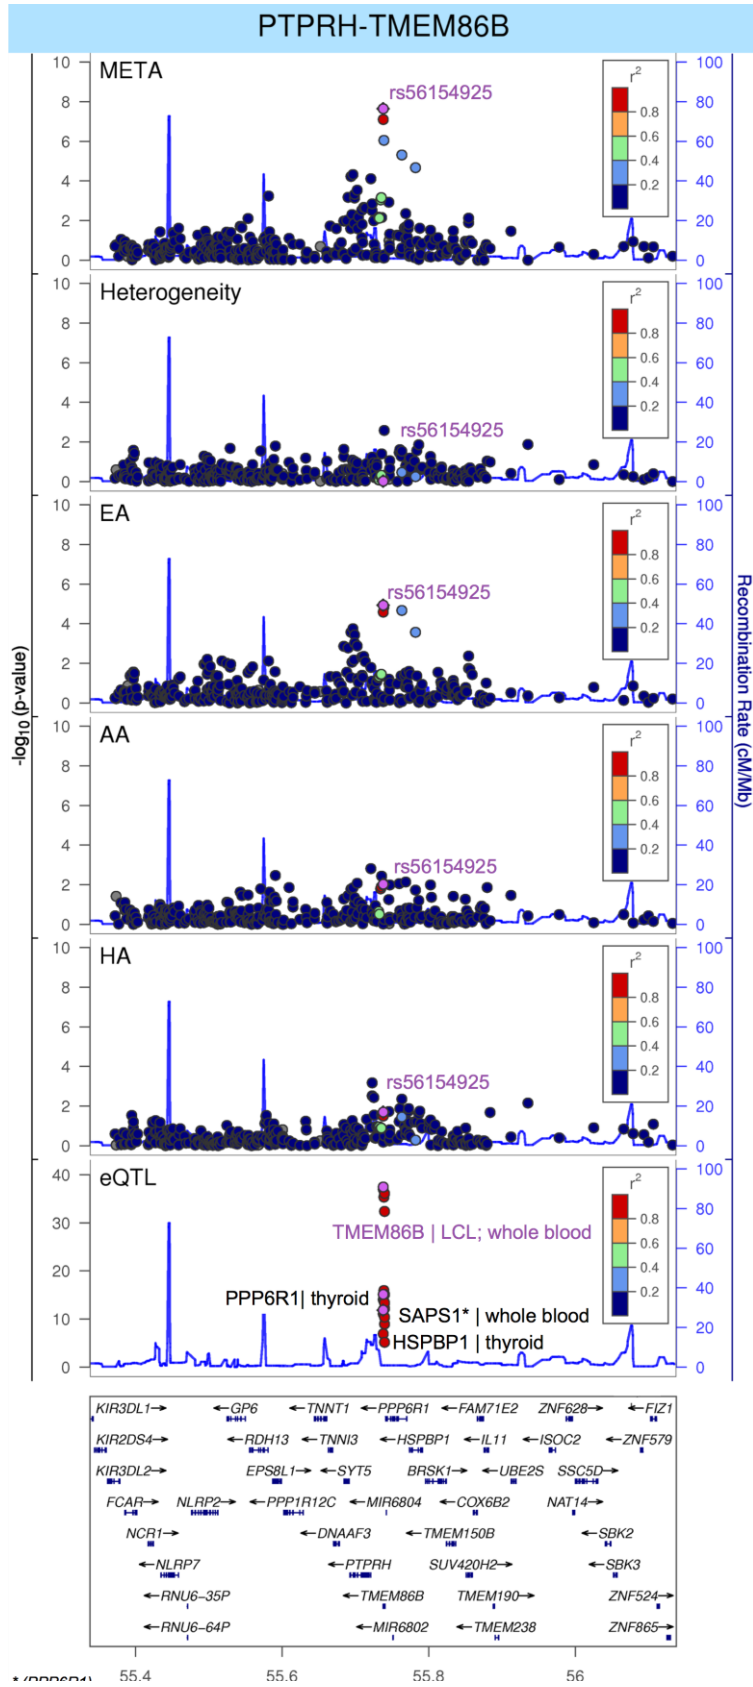



p. ENTHD1-GRAP2

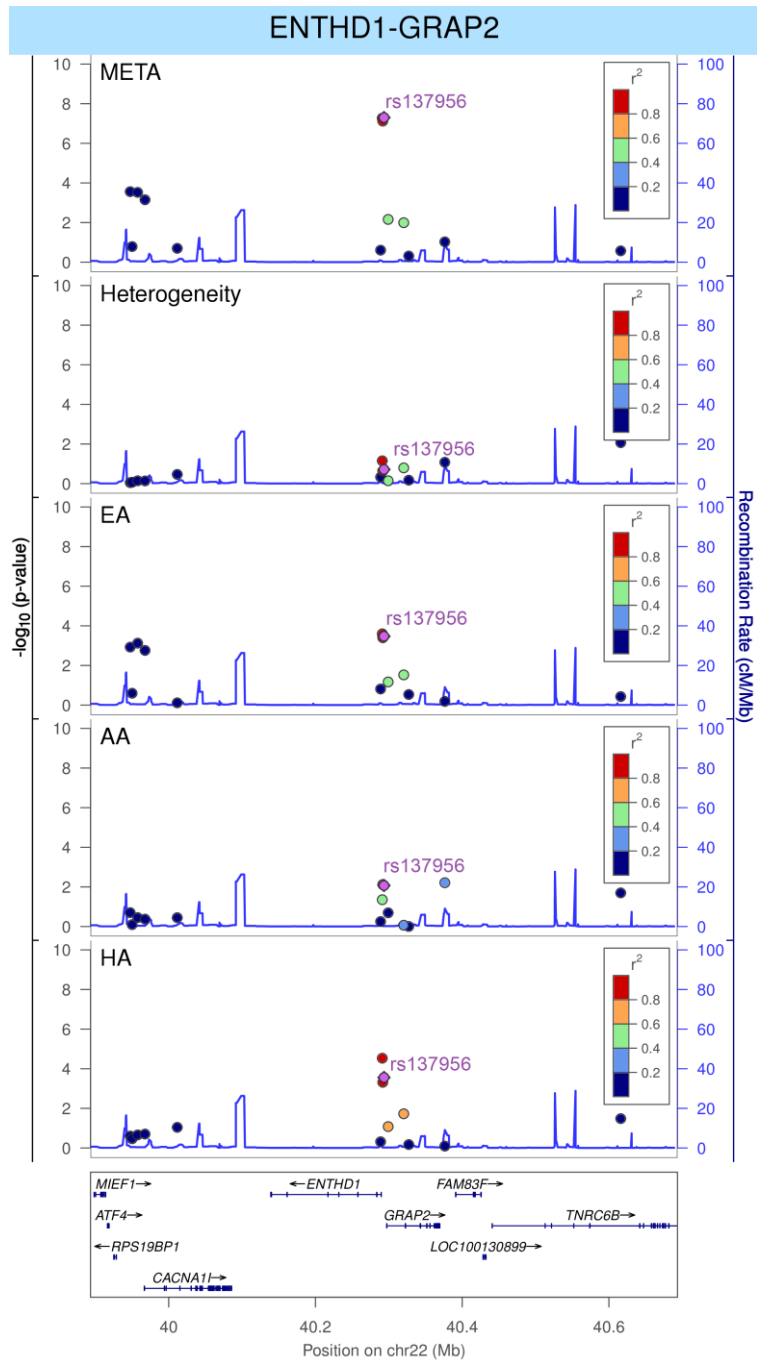

**Supplementary Figure 14.** Plots of novel Tier 2 meta-analysis and transancestral-mapping regions. Plots appear in the order found in Table 3b. Individual plots were created using LocusZoom standalone software (<http://locuszoom.sph.umich.edu/>).

a. GFI1

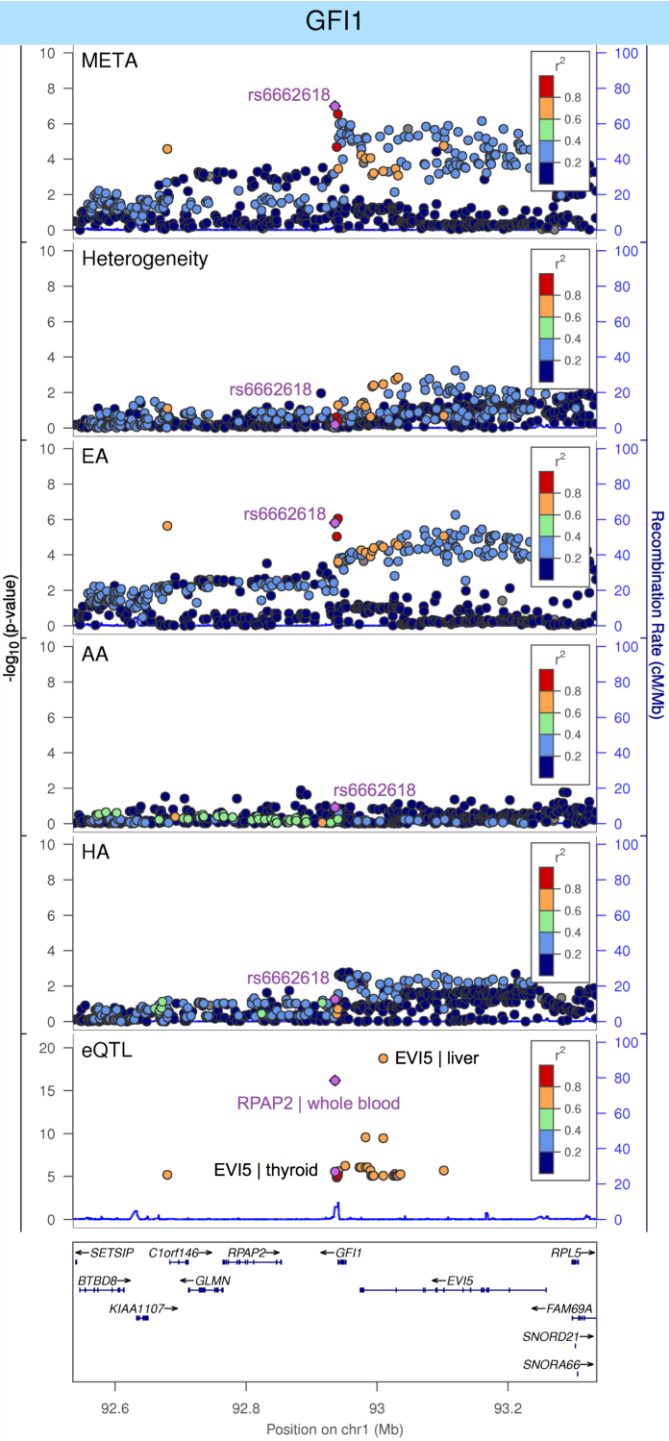

b. NOTCH2

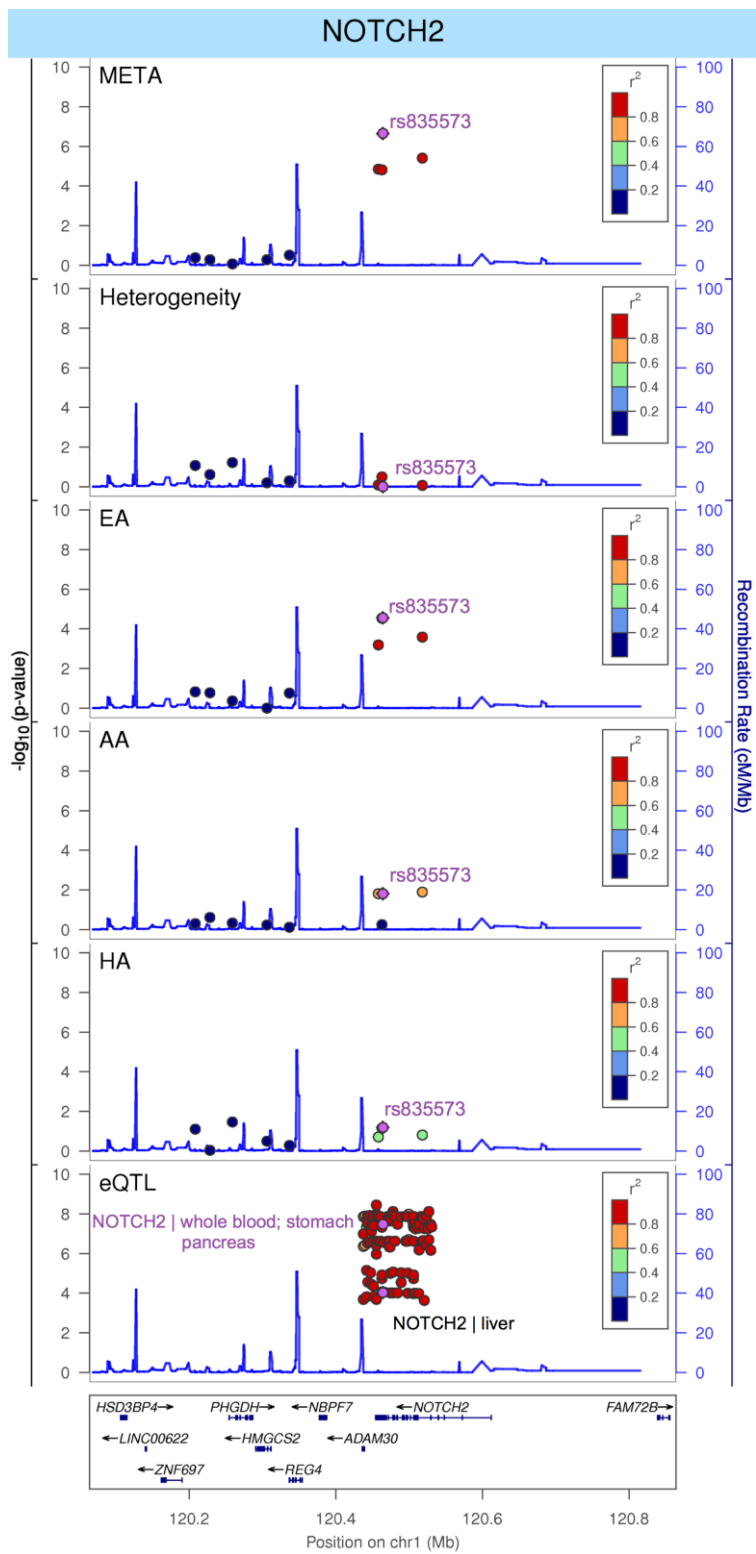

c. FASLG

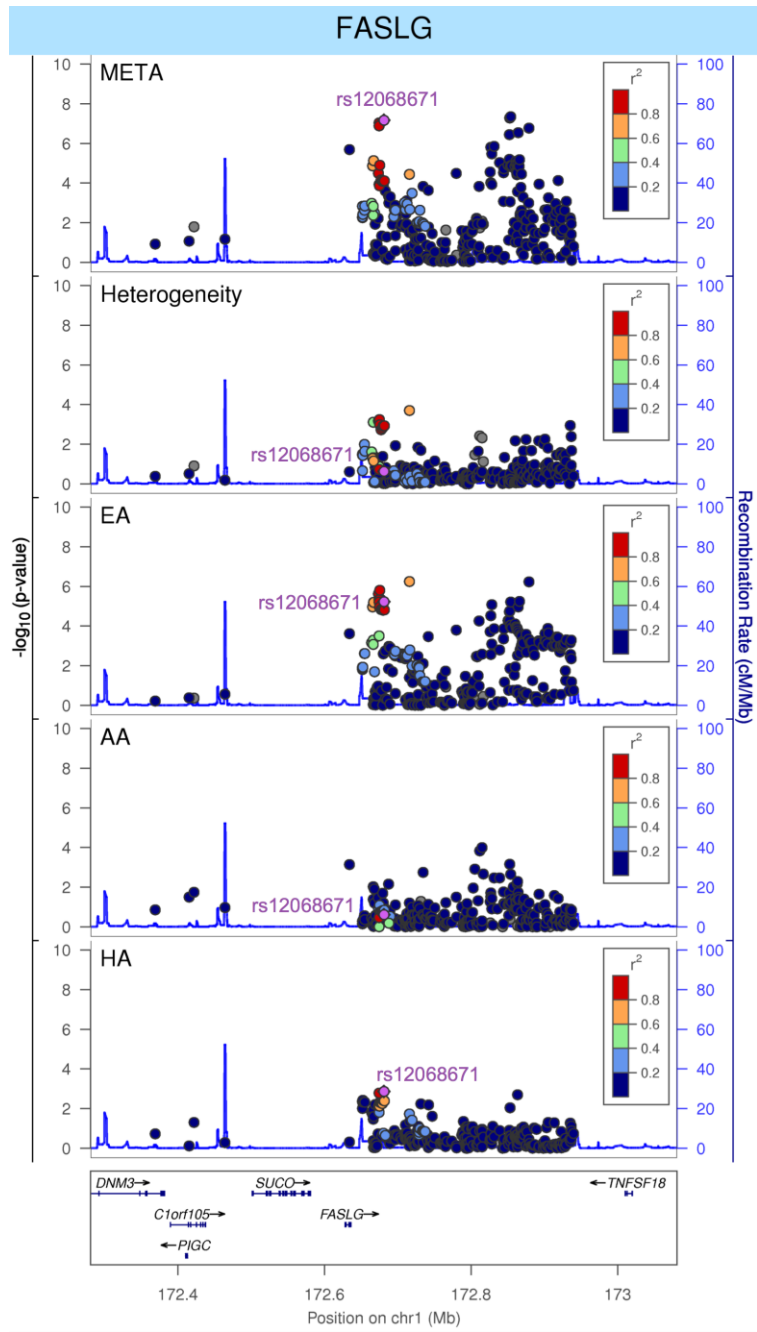

d. LBH

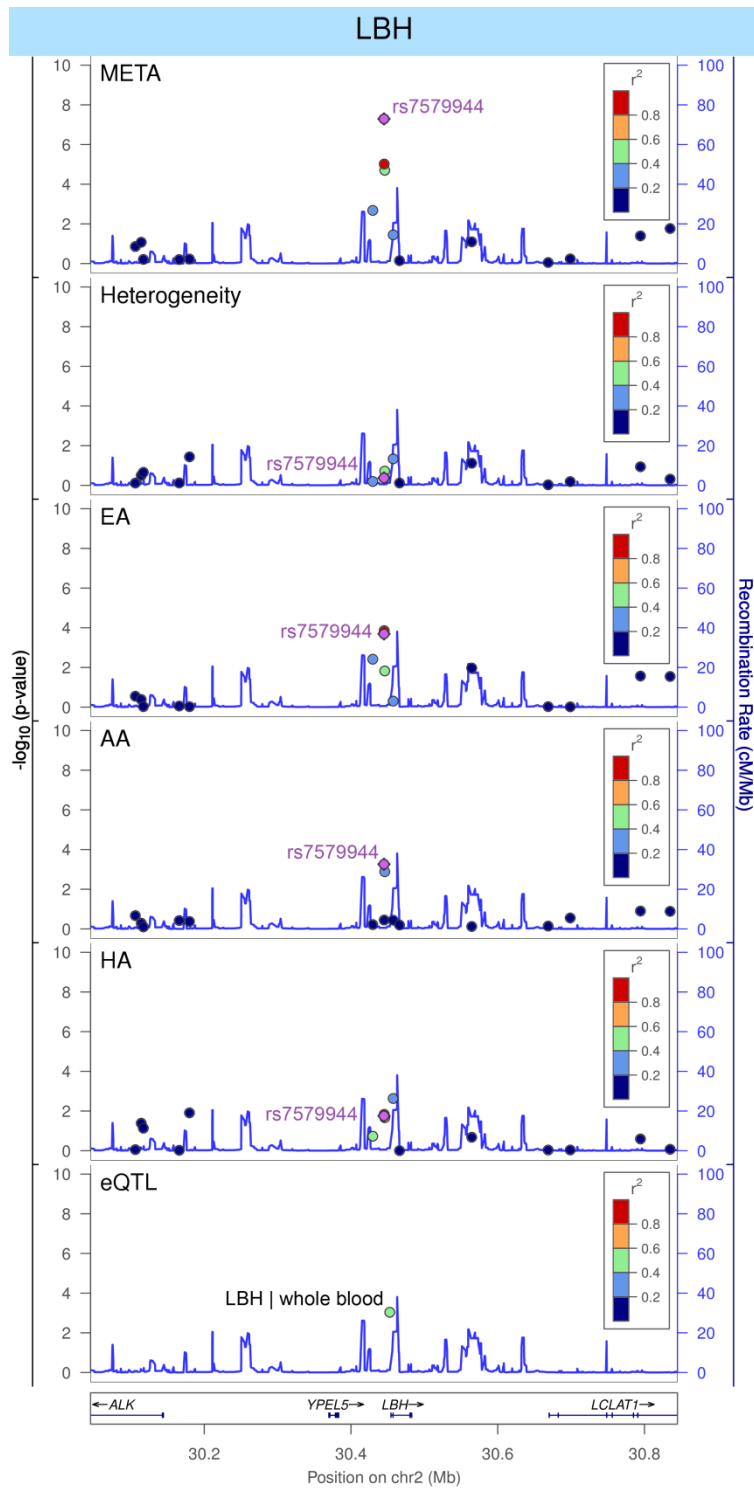

e. CLPTM1L-SLC6A3

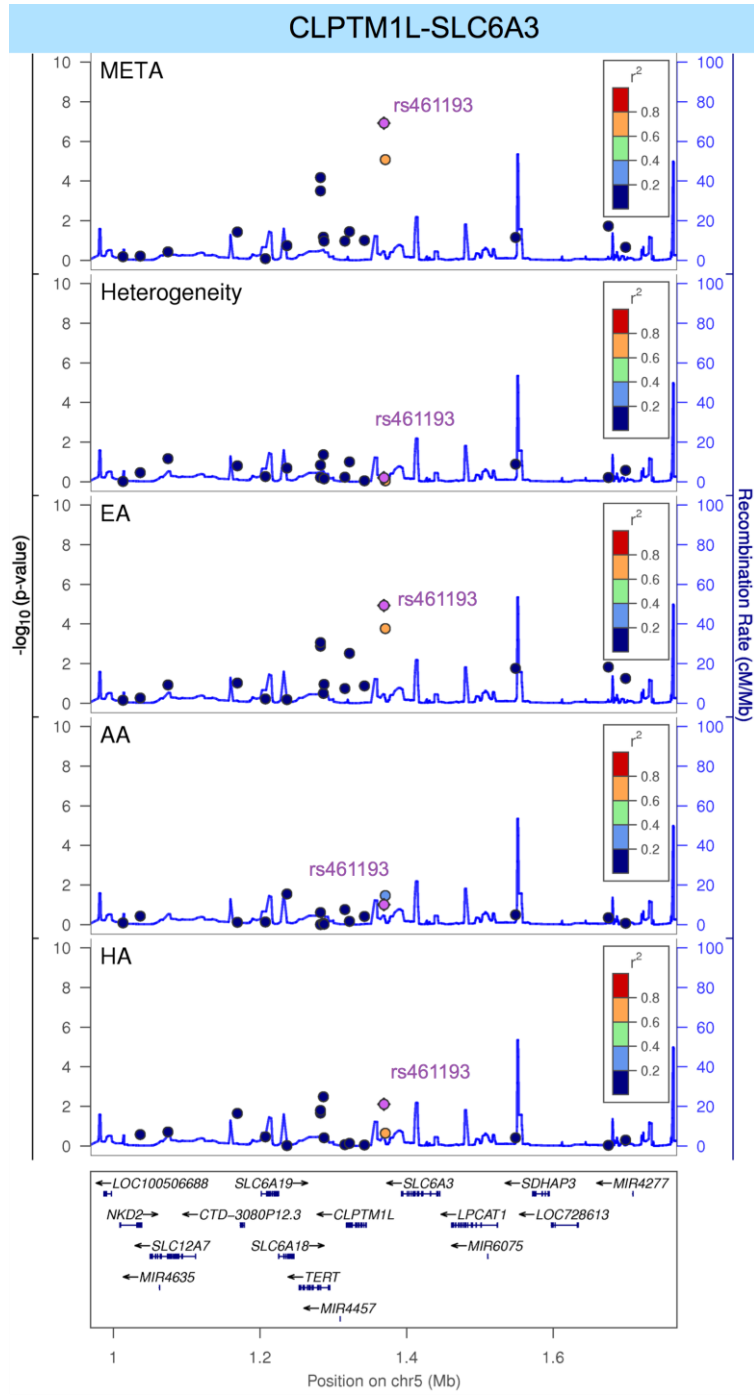

f. ATXN1

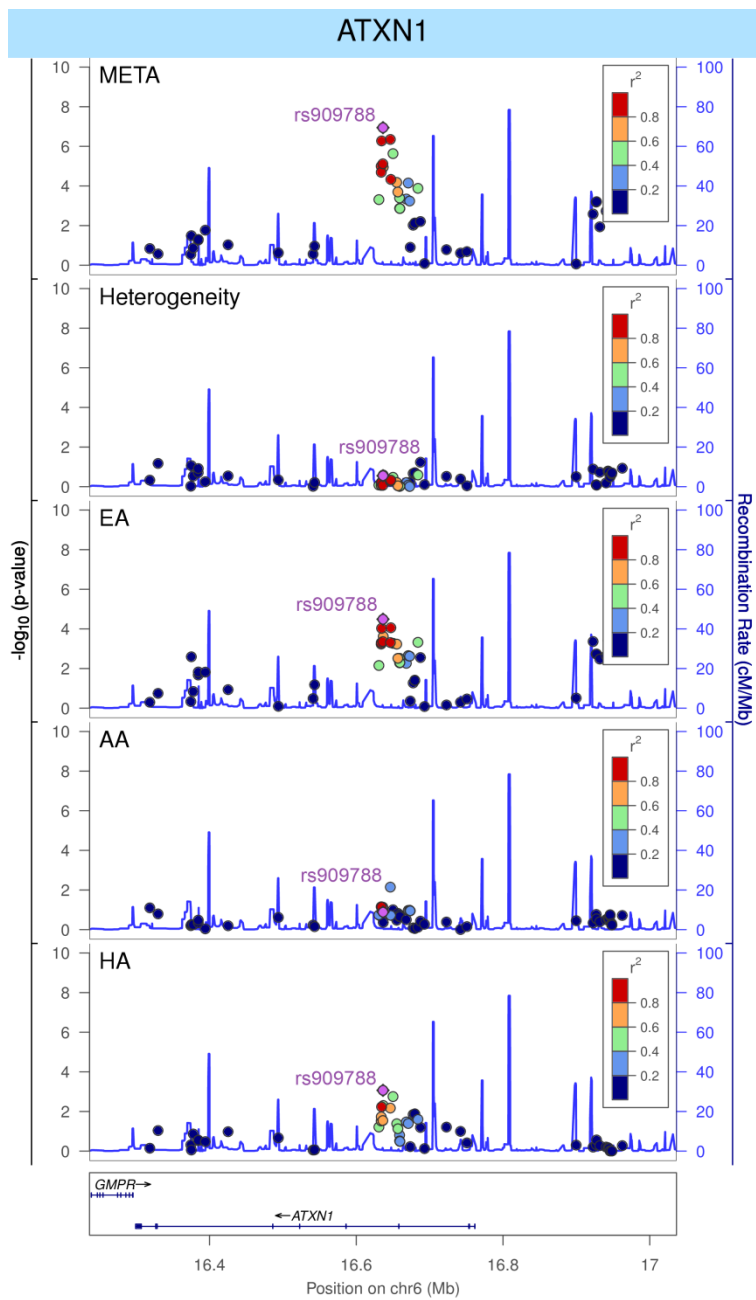

g. AH1

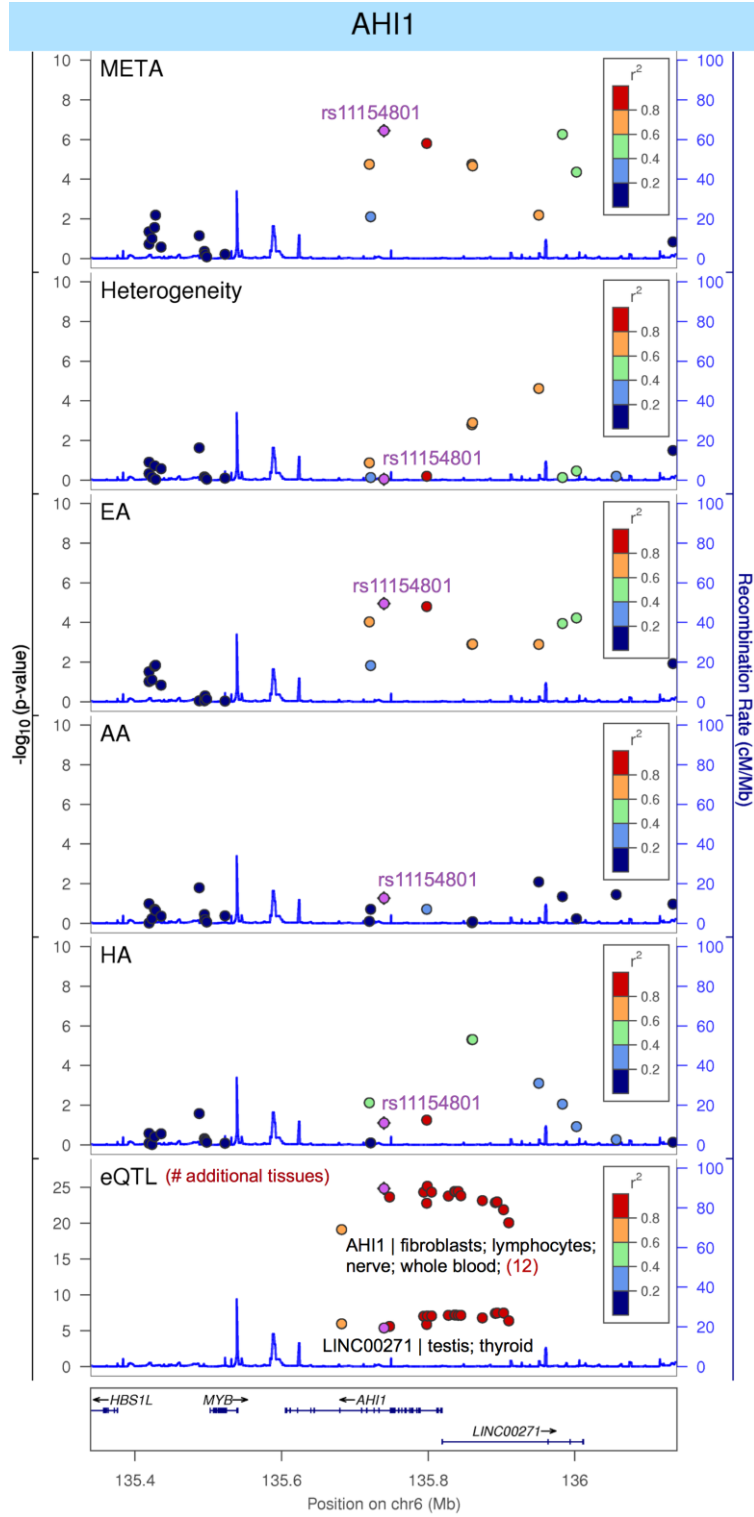



h. SKAP2

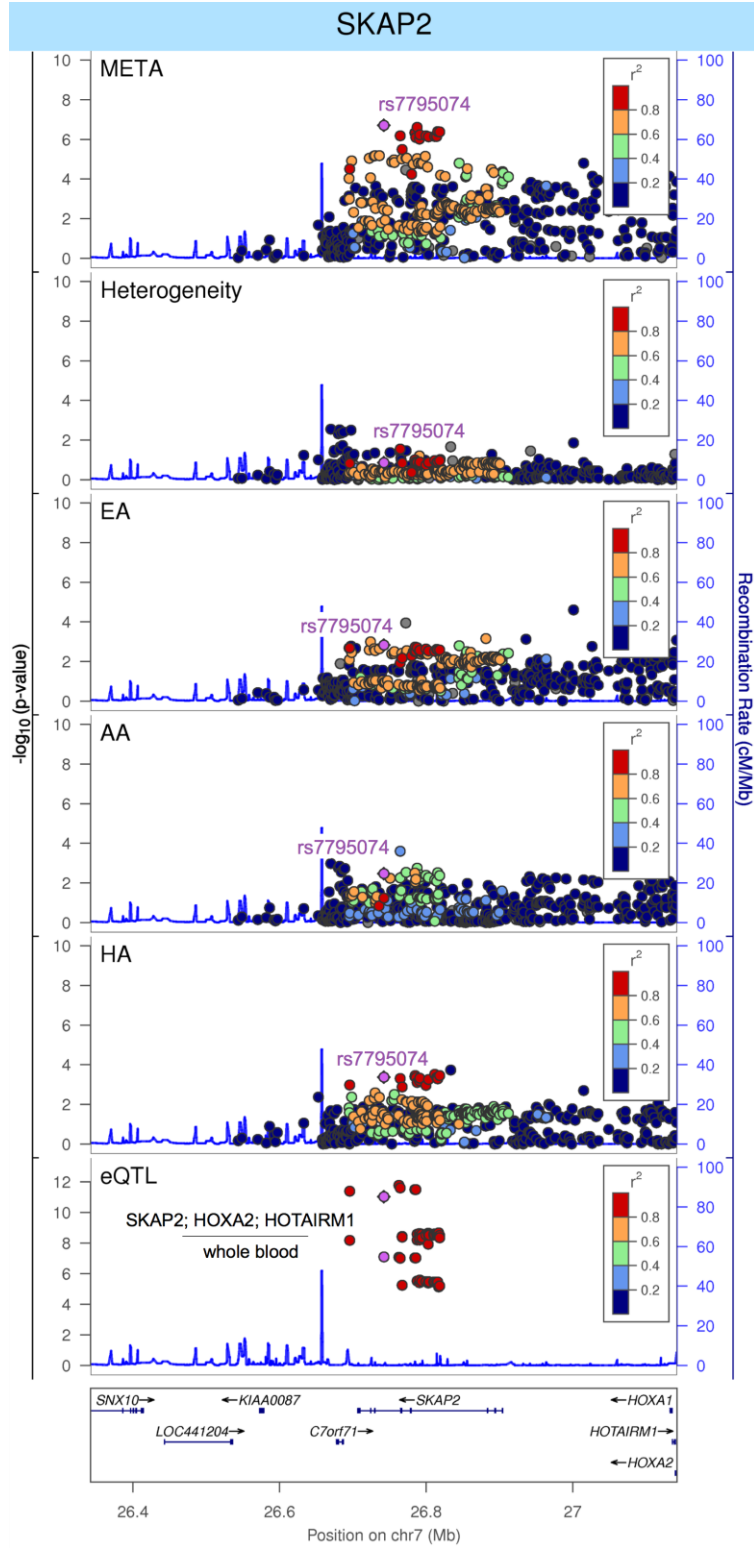

i. TNKS

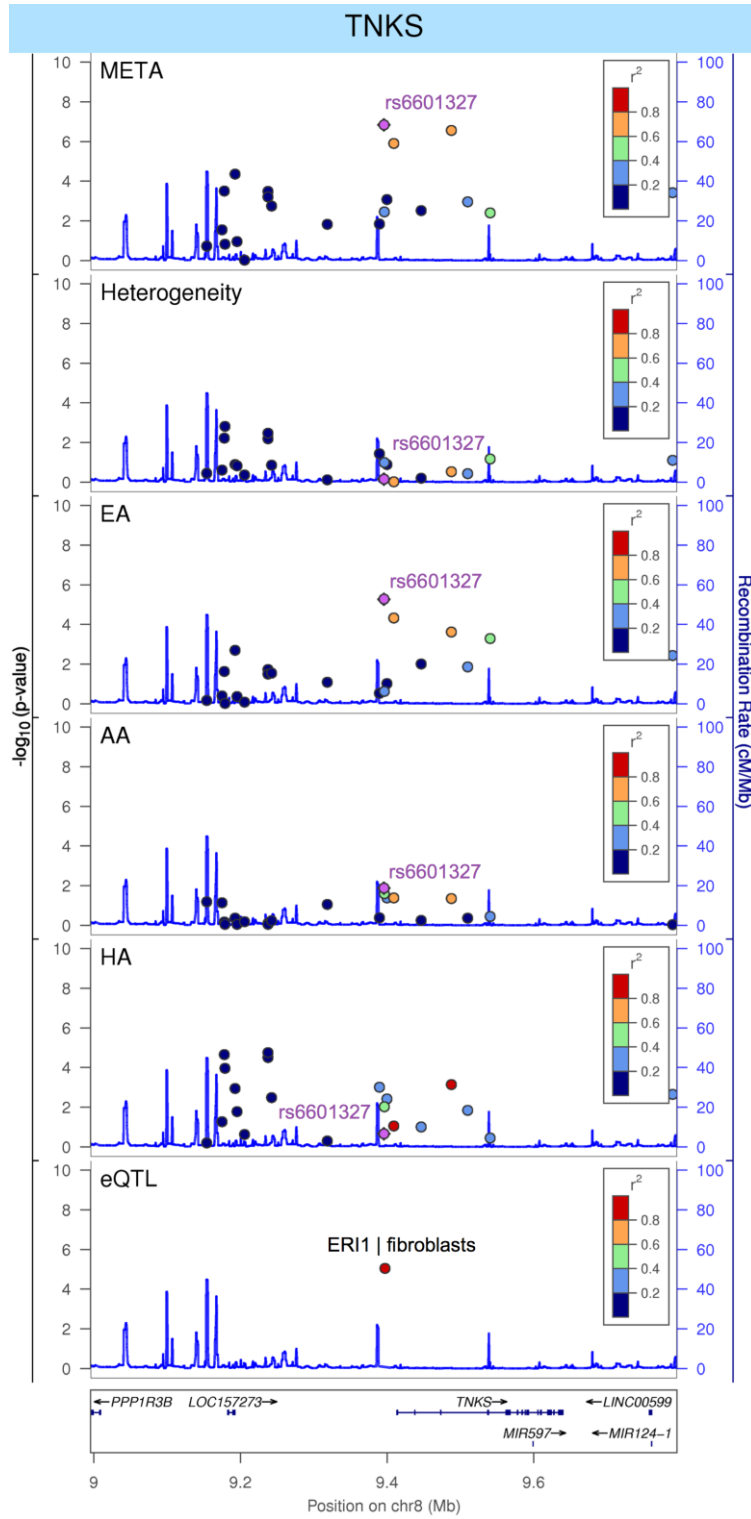

j. TRAFD1-HECTD4

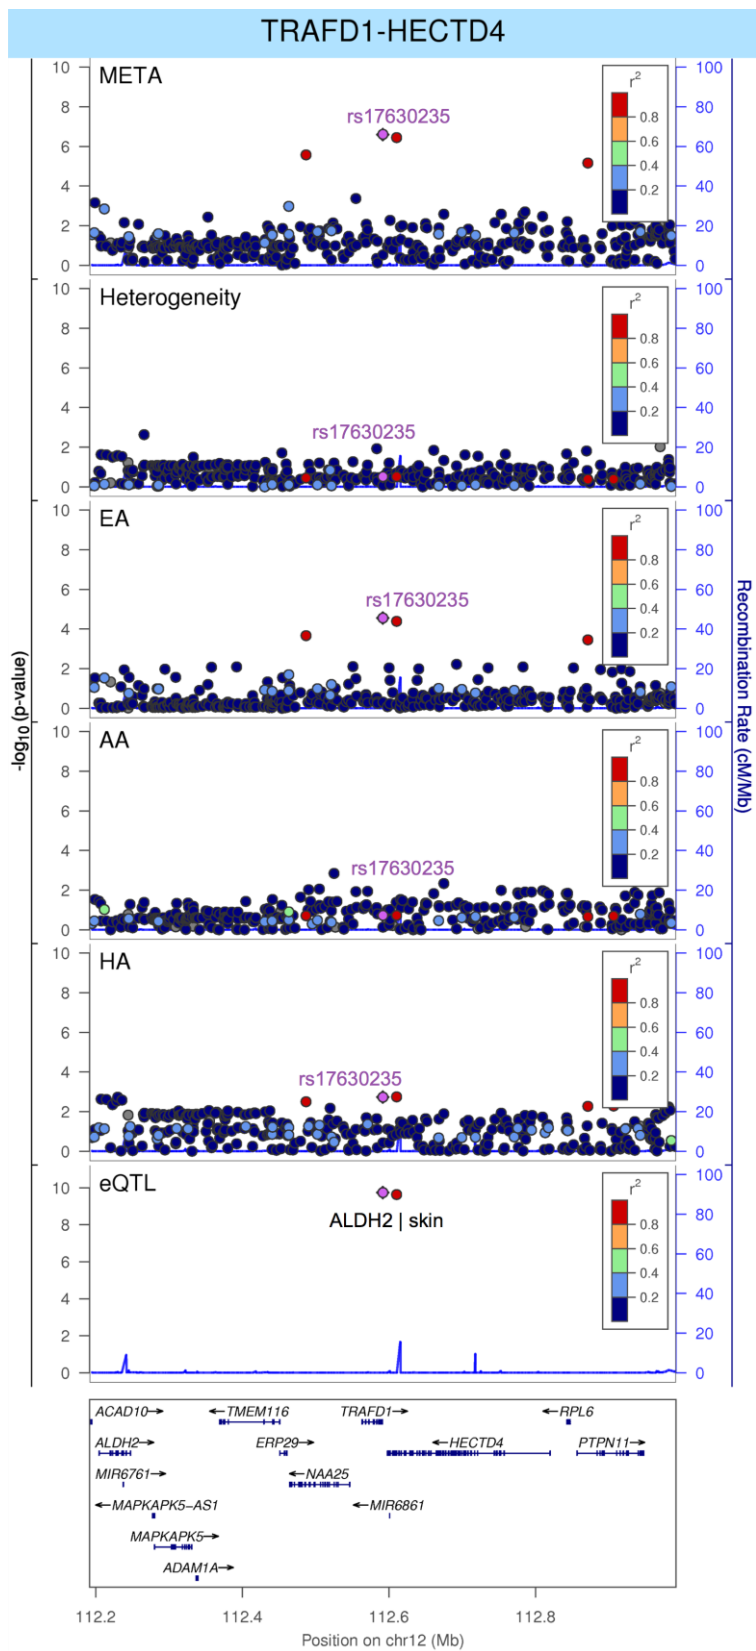

**Supplementary Figure 15.** Plots of Tier 1 meta-analysis regions noted for transancestral-mapping. Plots appear in the order found in Table 4. Individual plots were created using LocusZoom standalone software (<http://locuszoom.sph.umich.edu/>).

a. TNFSF4-LOC100506023

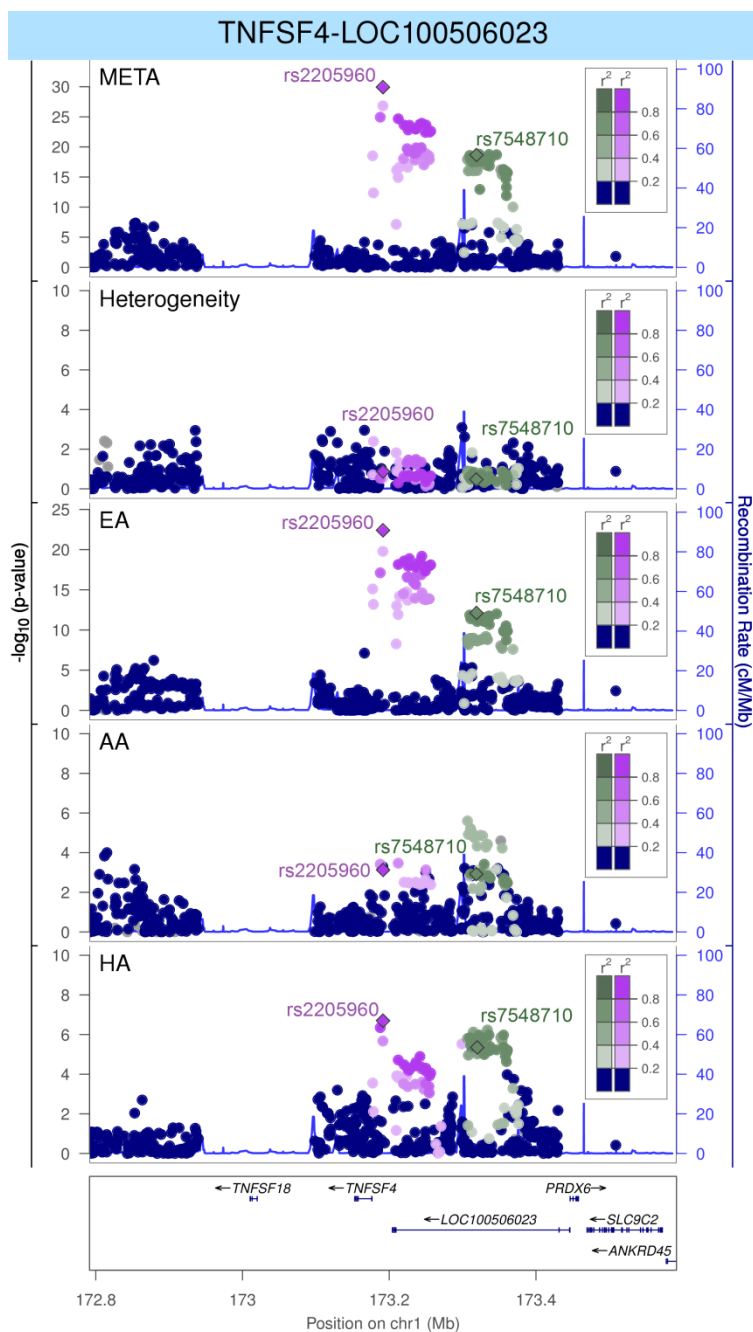

b. TNFSF4-LOC100506023

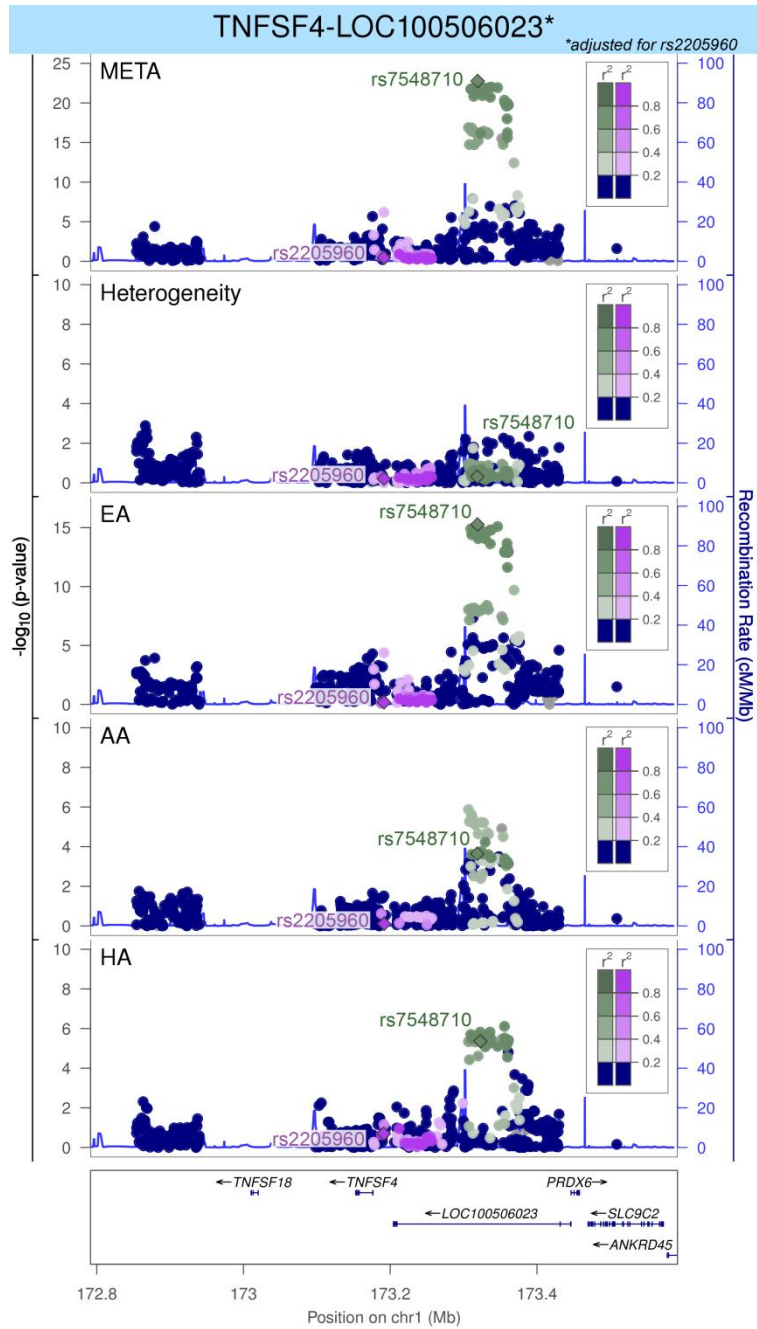

c. NMNAT2-SMG7-NCF2

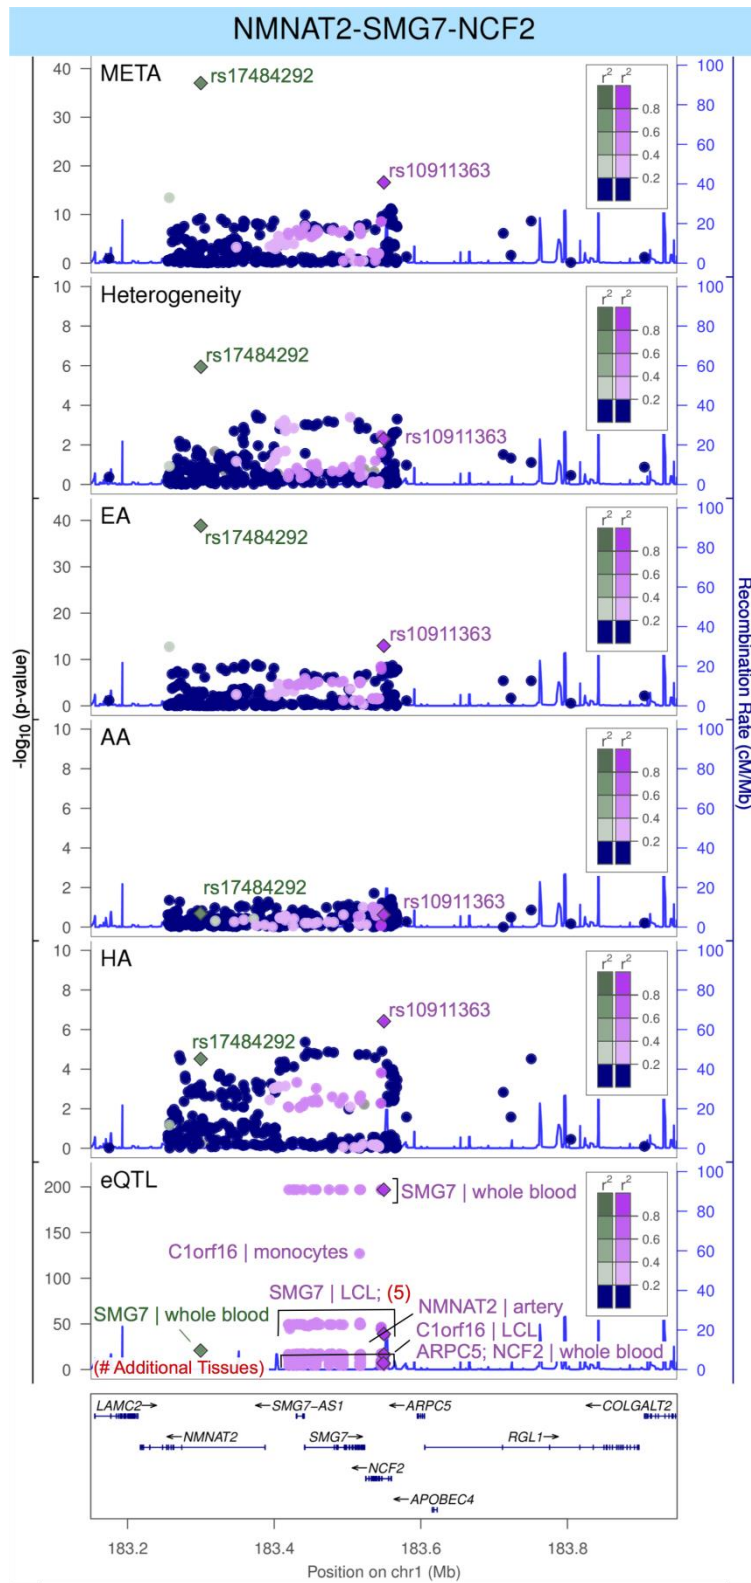

d. IL2-IL21

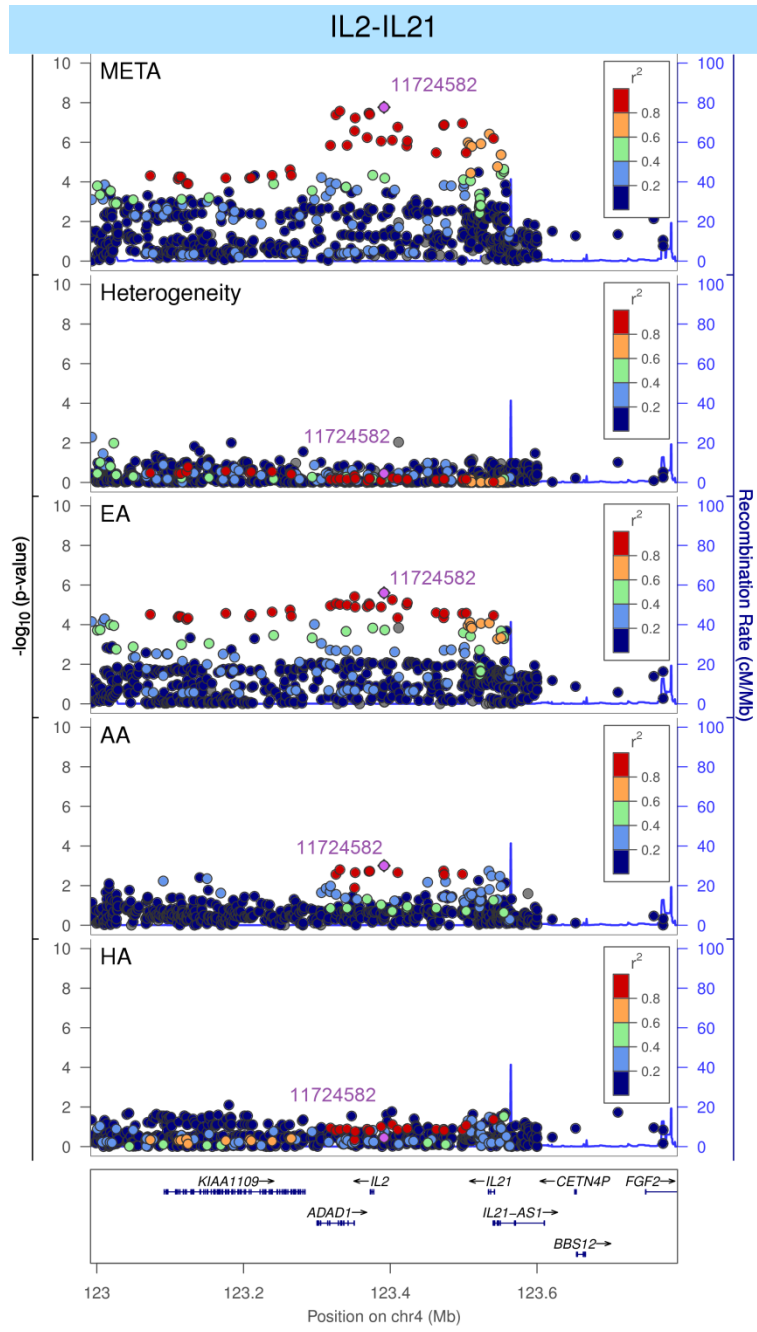

e. PTTG1-MIR146A

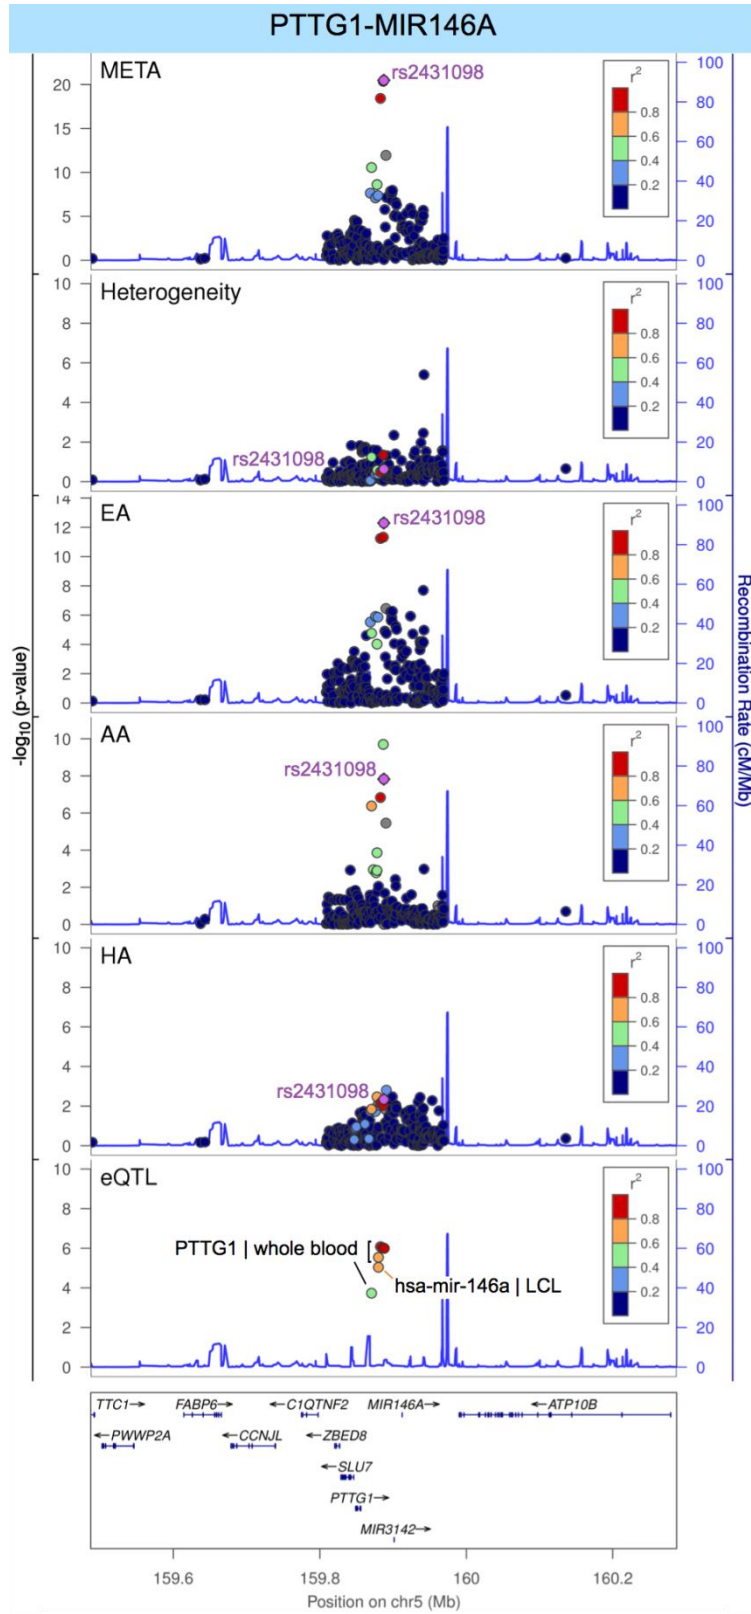



f. IRF5-TNPO3

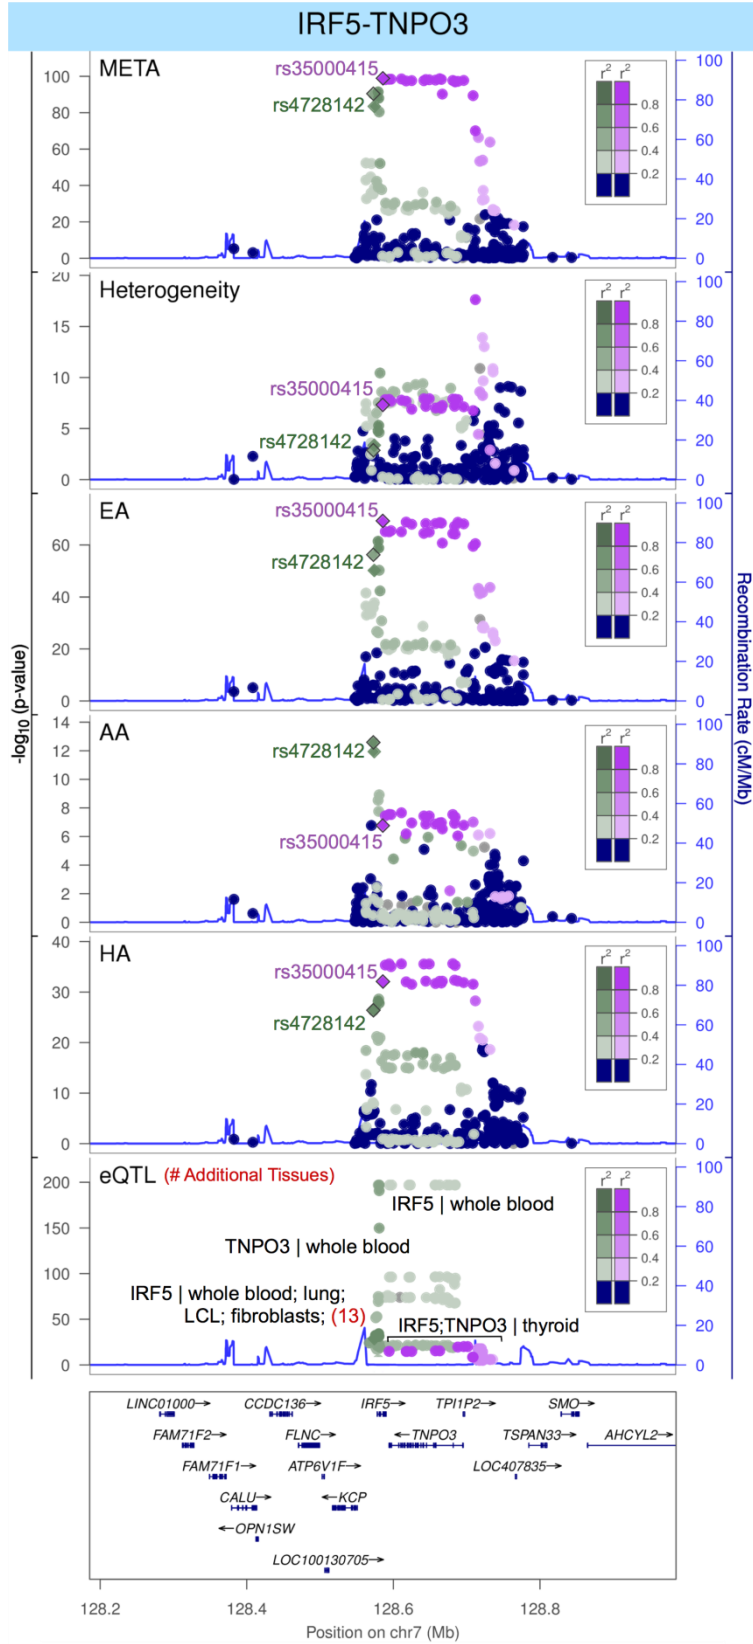

g. IRF5-TNPO3 (adjusted for rs350004115)

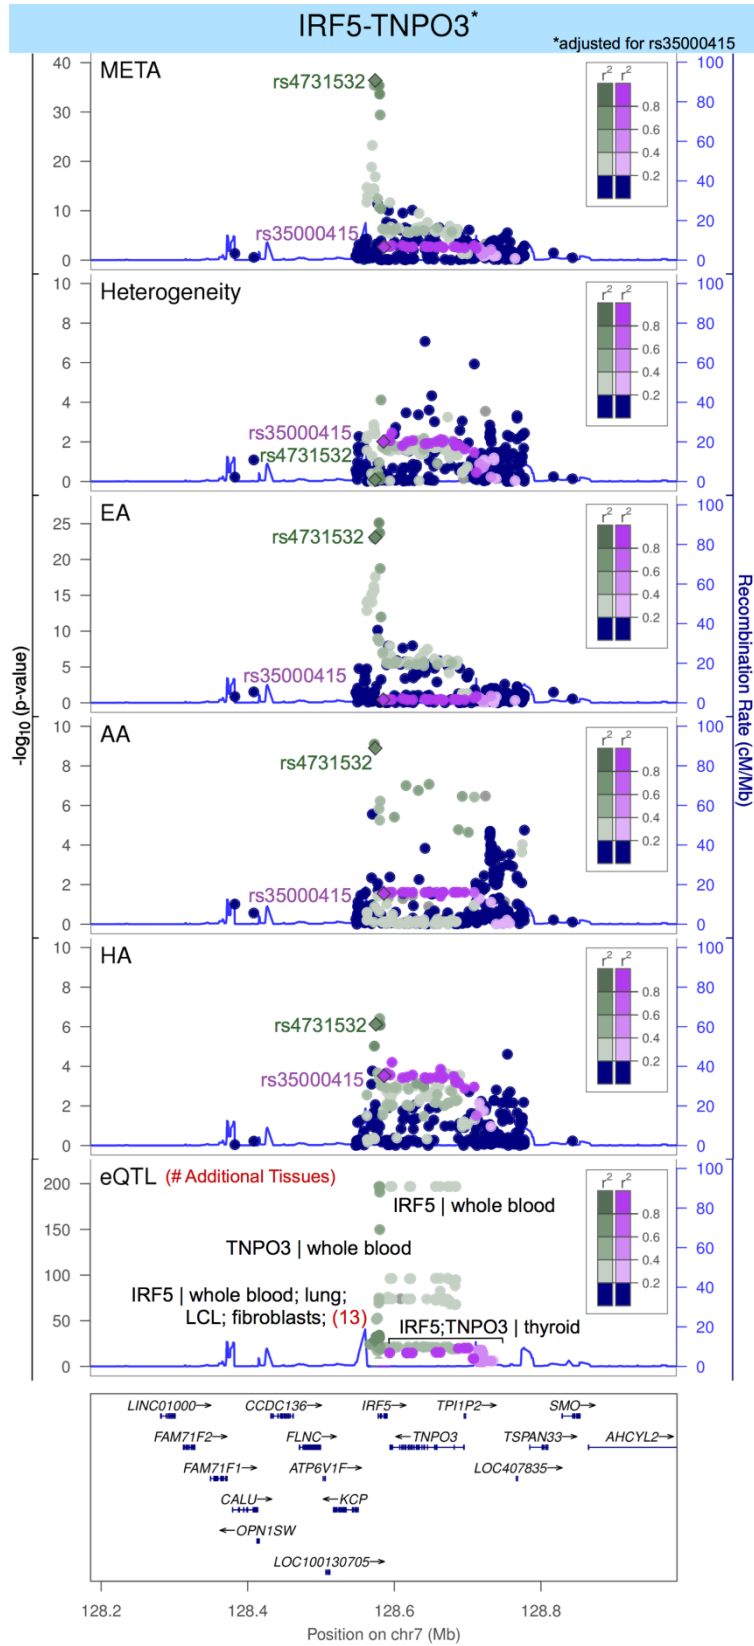

h. LYN-RPS20

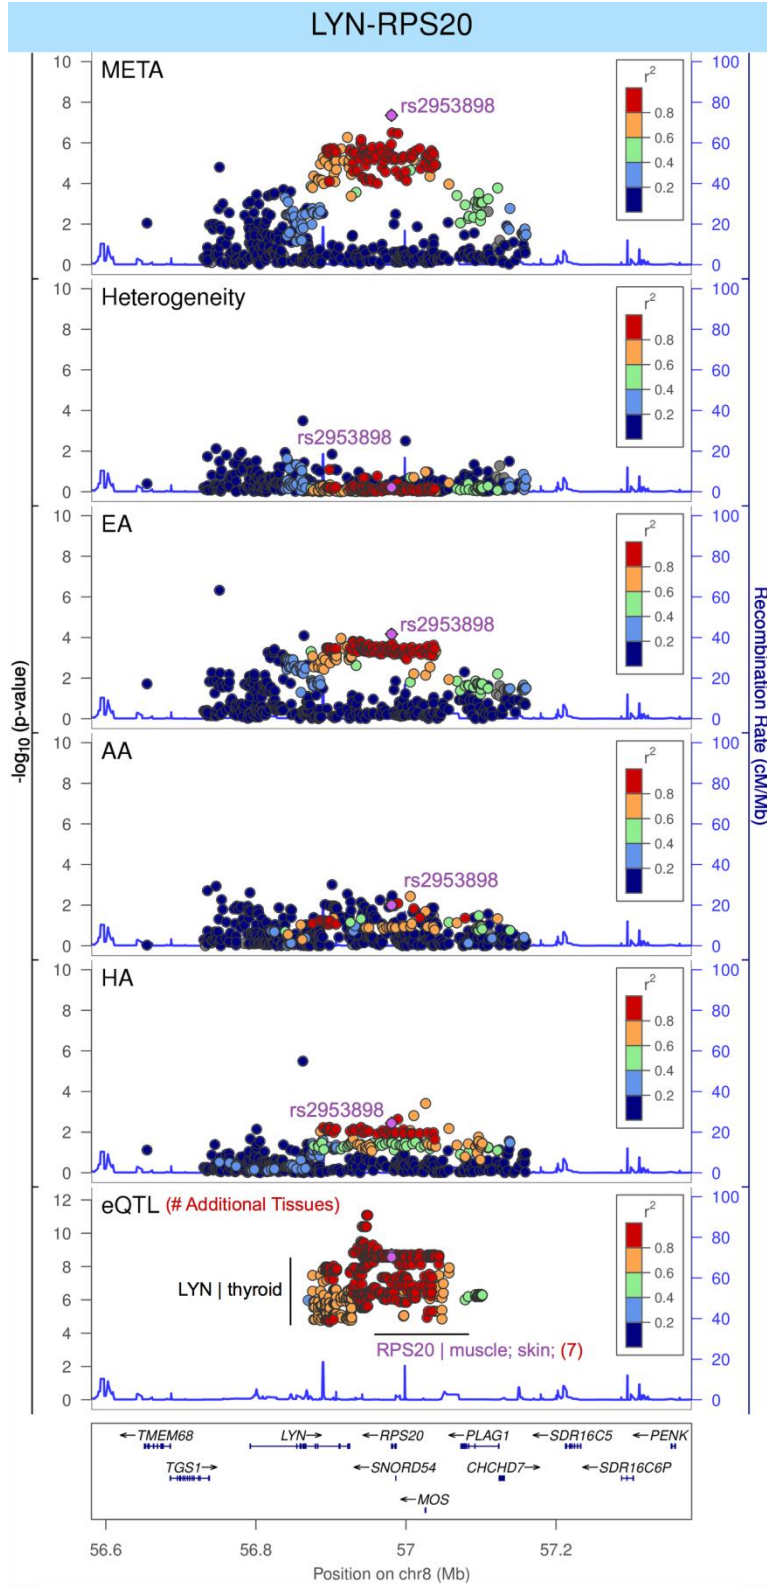

i. PDHX-CD44

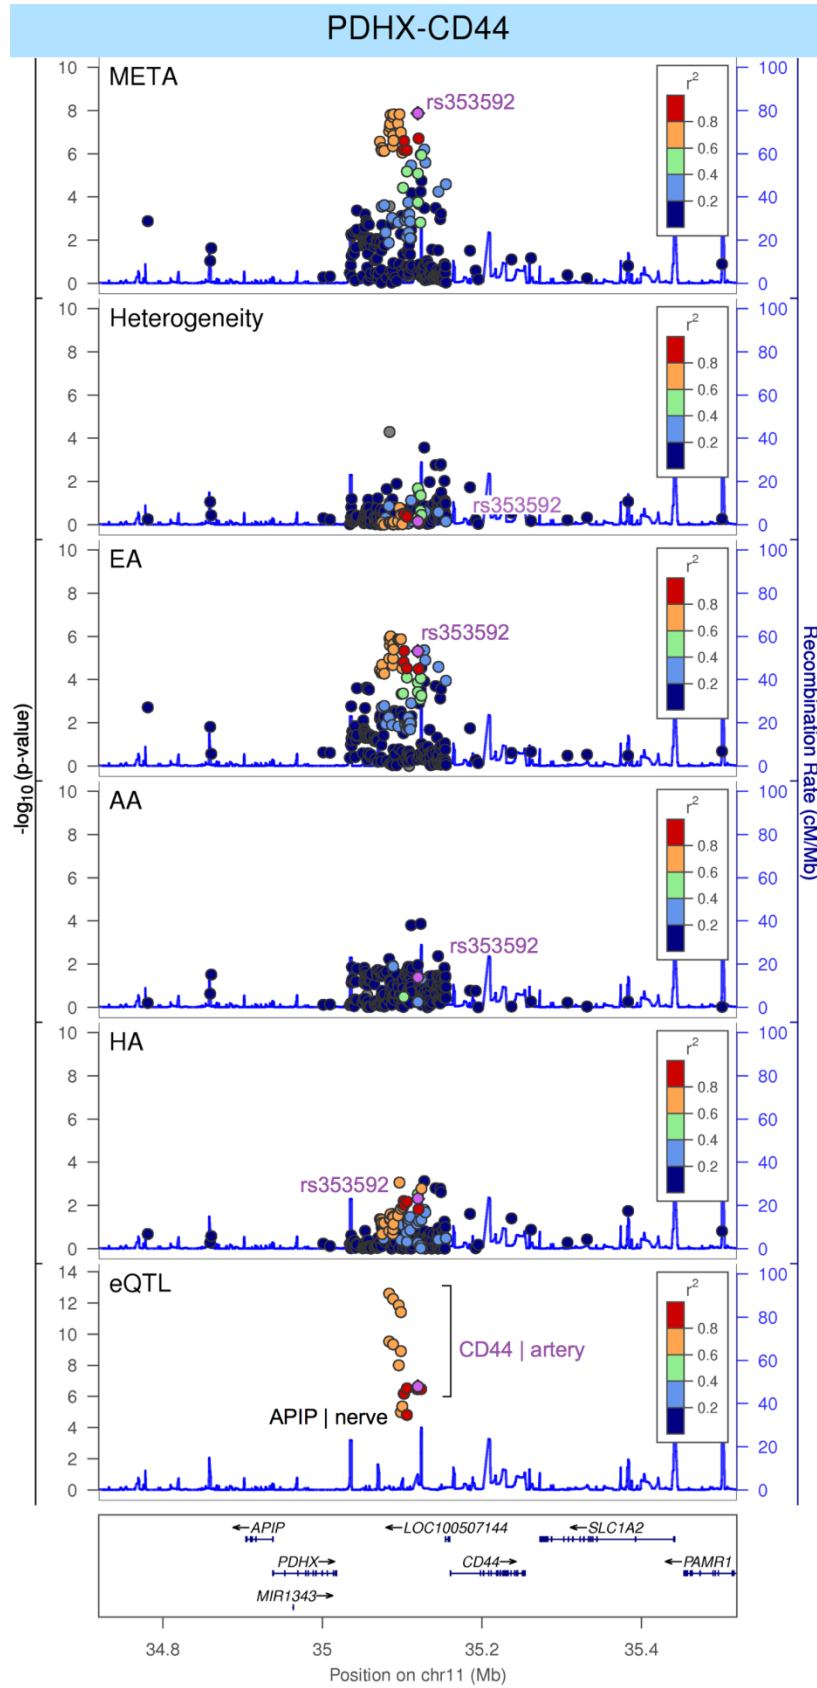

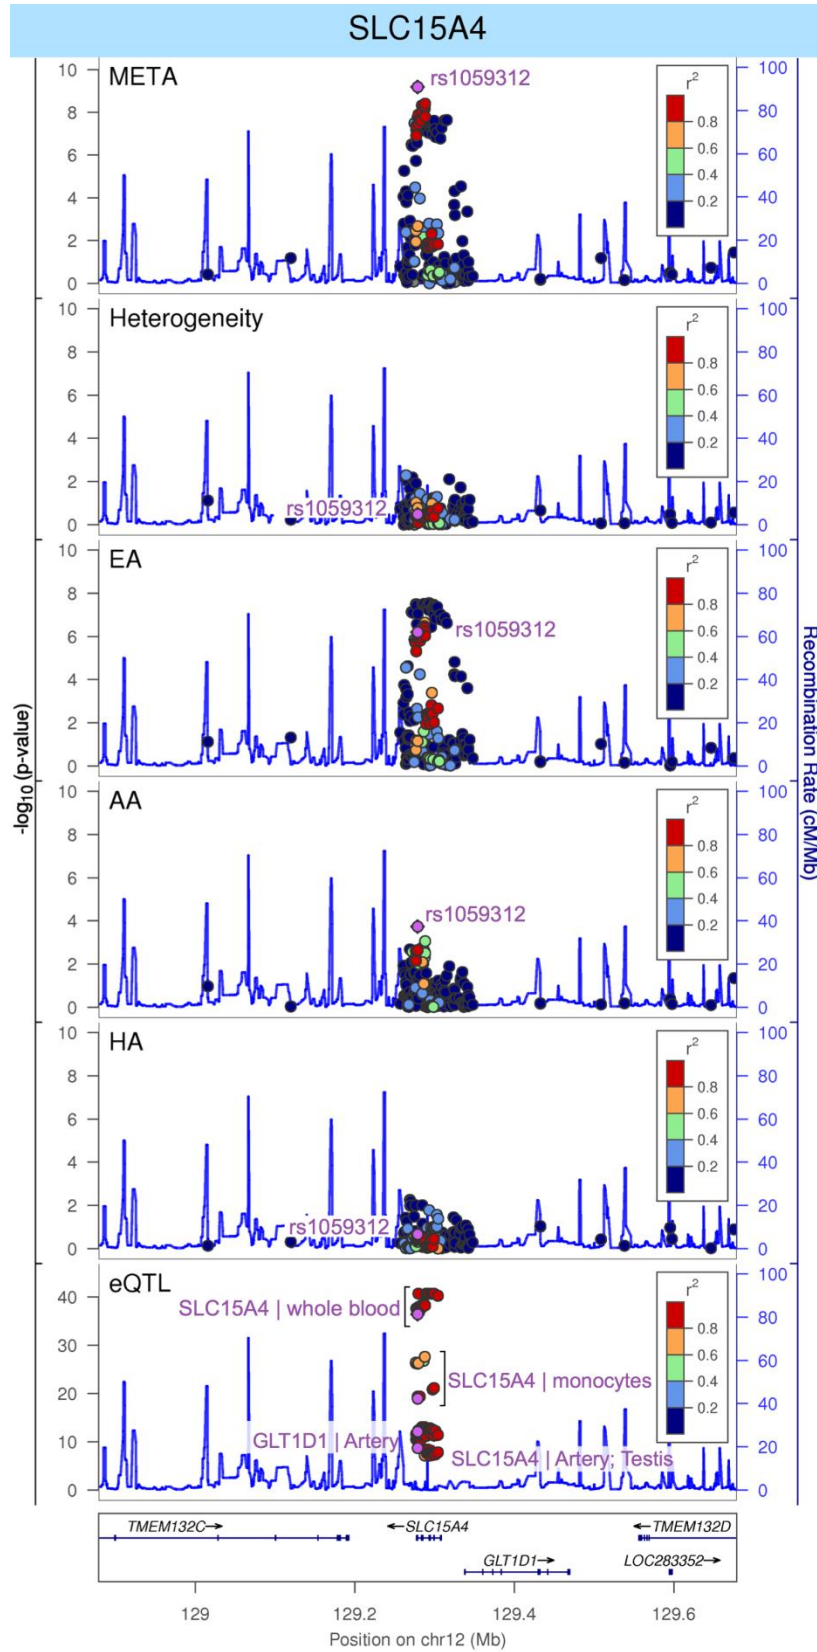

k. NCOA5-CD40

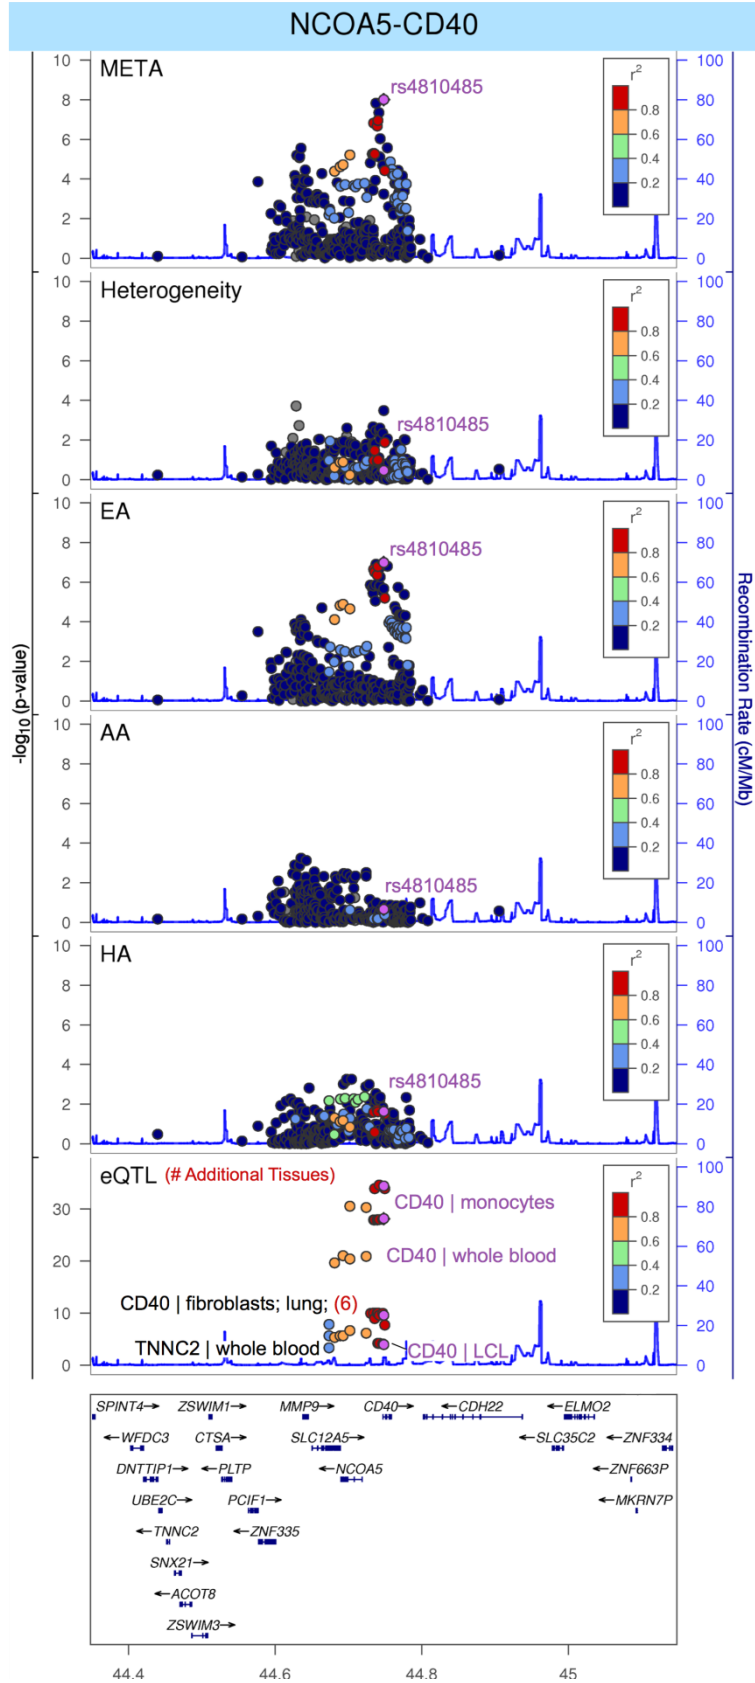

**Supplementary Figure 16.** Plots of additional meta-analysis regions noted for transancestral-mapping ( $p\text{-value}_{\text{fdr}} < 0.001$ ). Plots appear in the order found in Supplementary Data 8. Individual plots were created using LocusZoom standalone software (<http://locuszoom.sph.umich.edu/>).

a. VANGL2

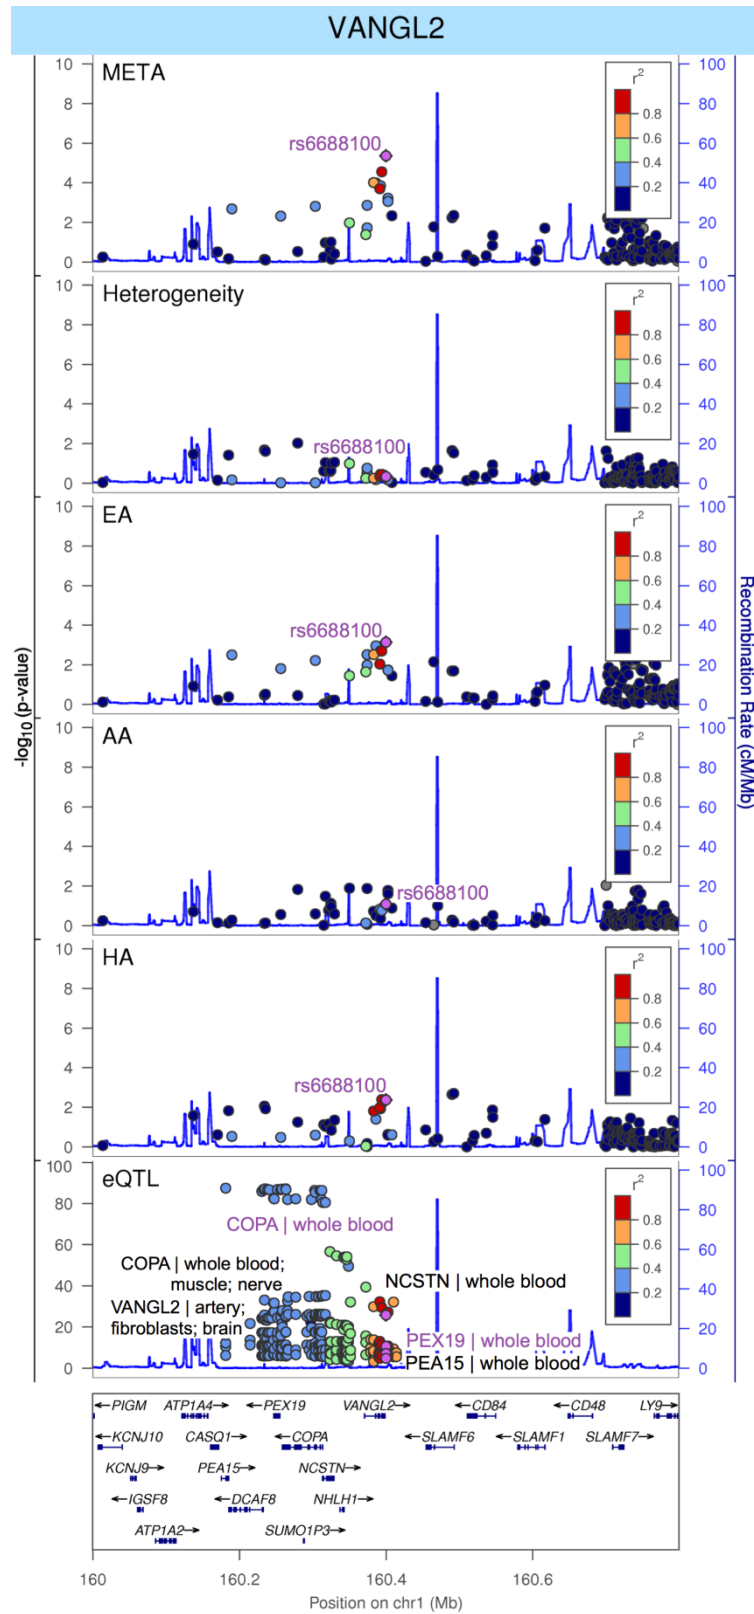

b. FCGR2A

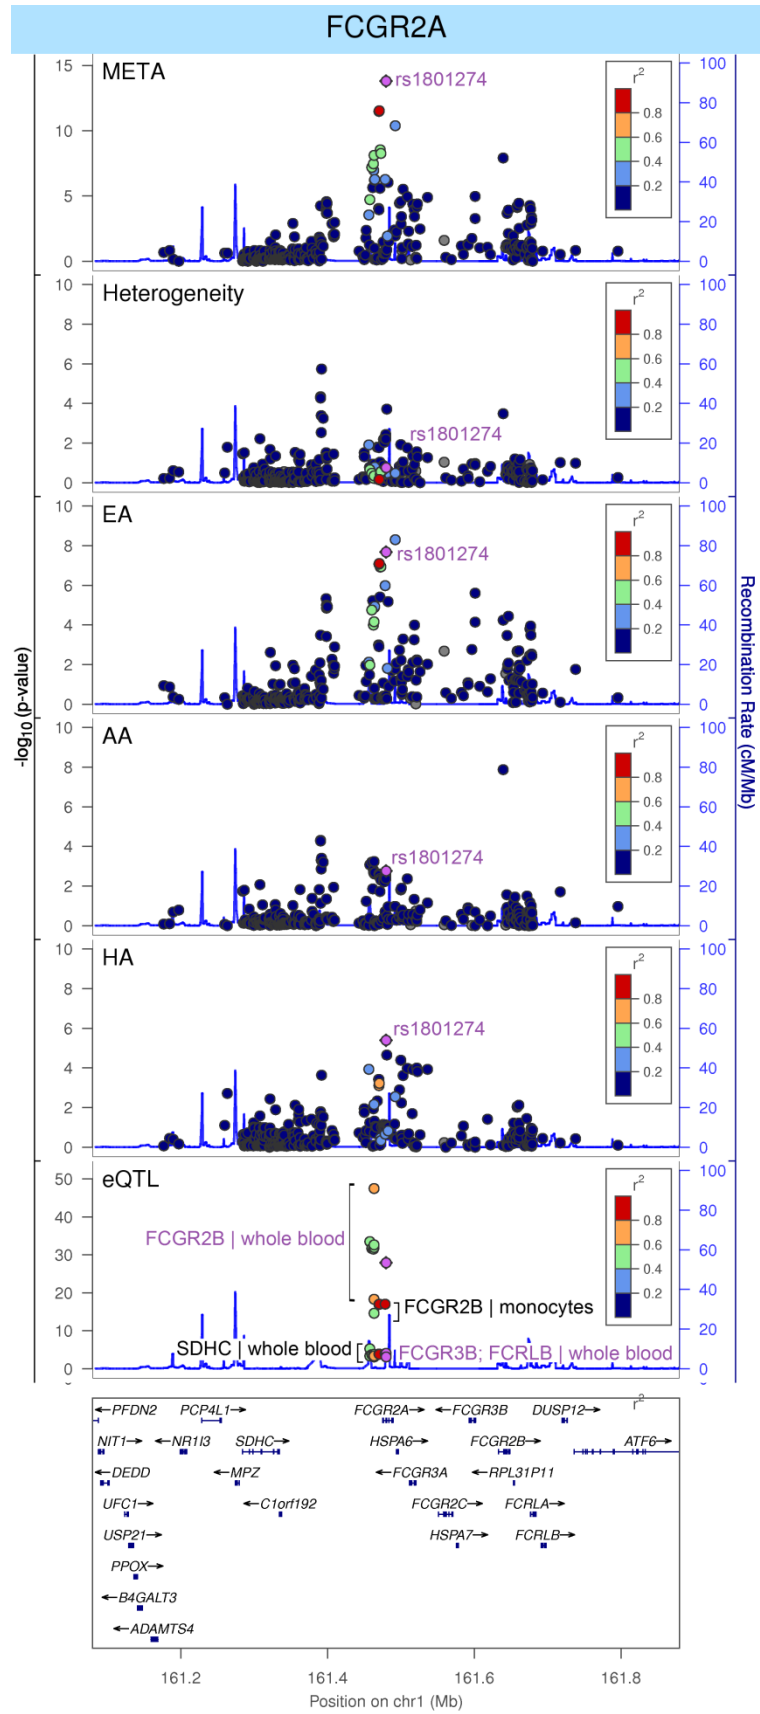







e. STAT4

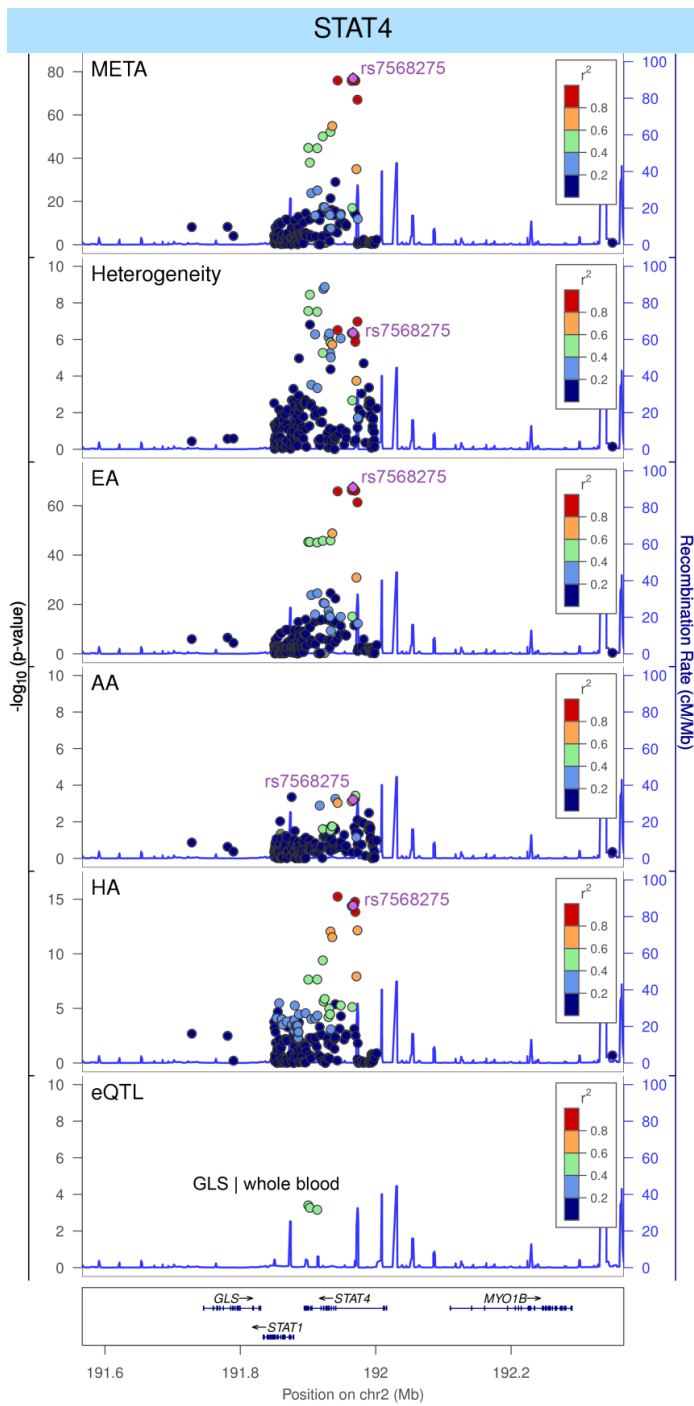

f. P XK-PDHB-KCTD6

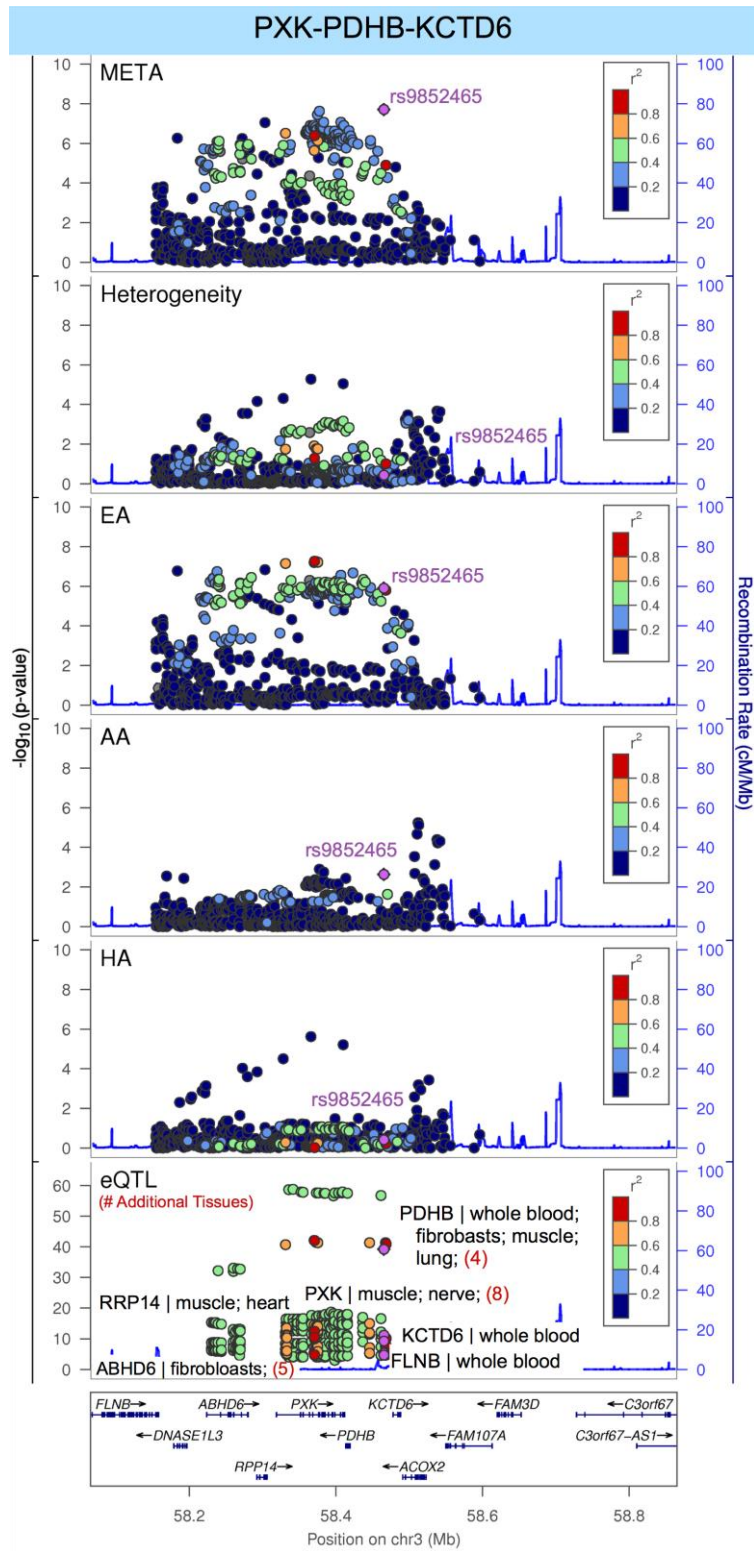

g. TMEM39A-TIMMDC1

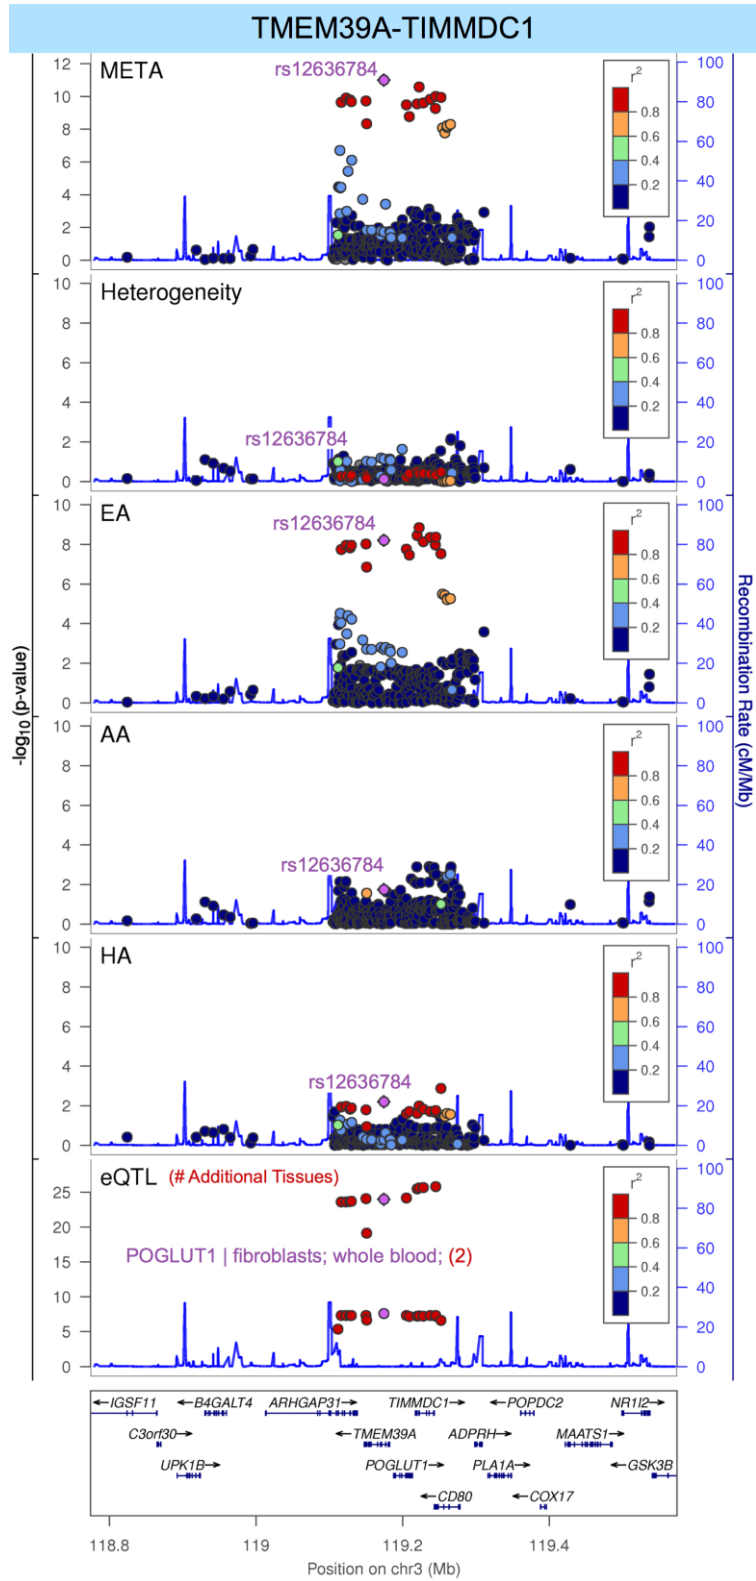

h. BANK1

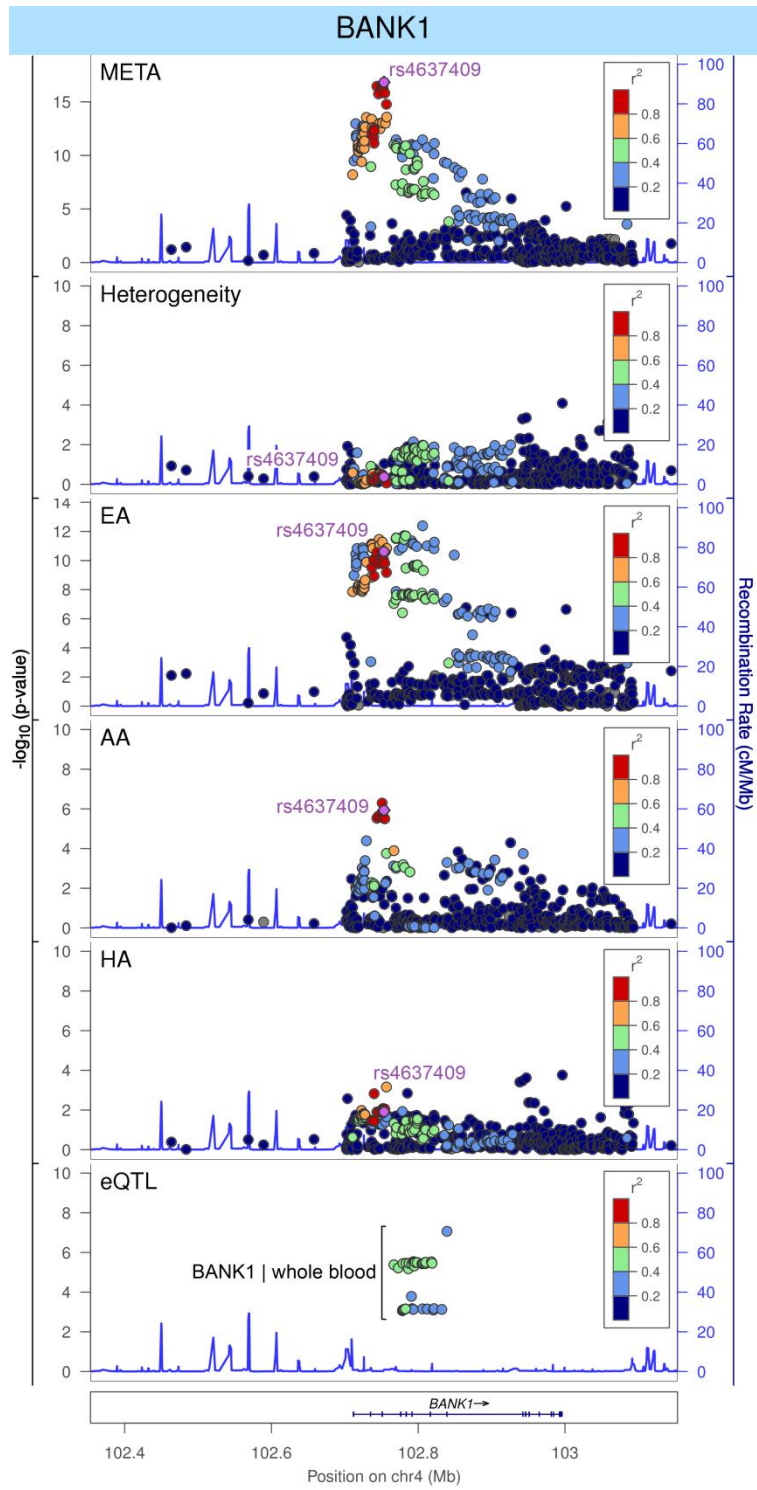

i. TNIP1

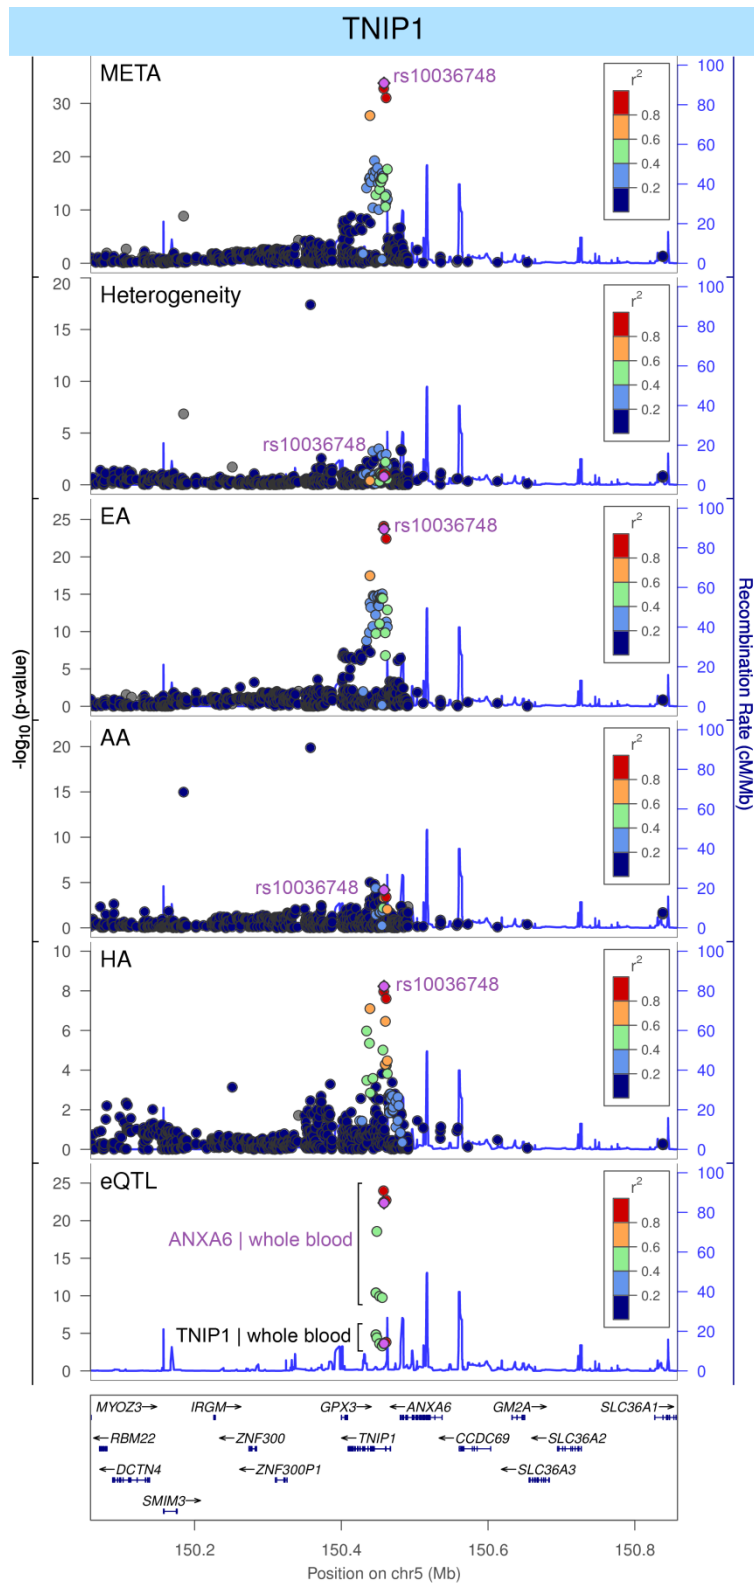

j. ATG5

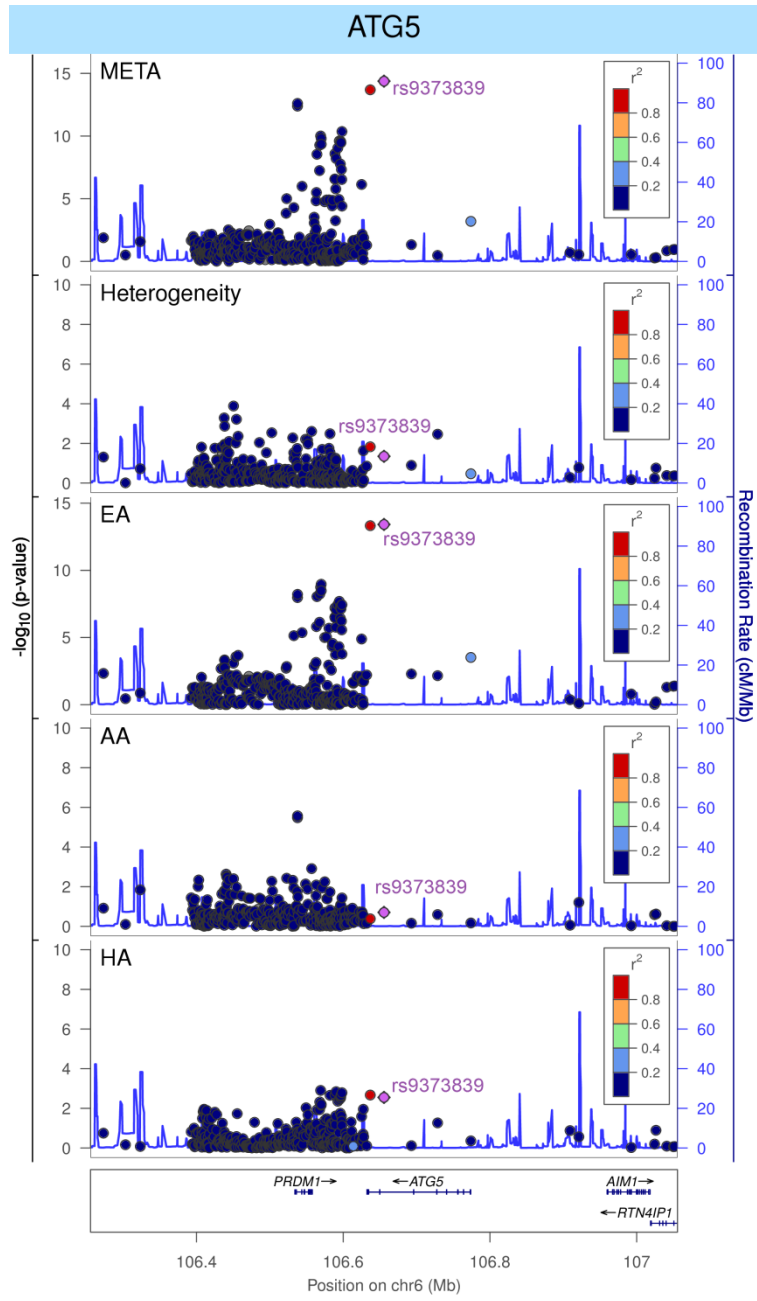



k. TAGAP

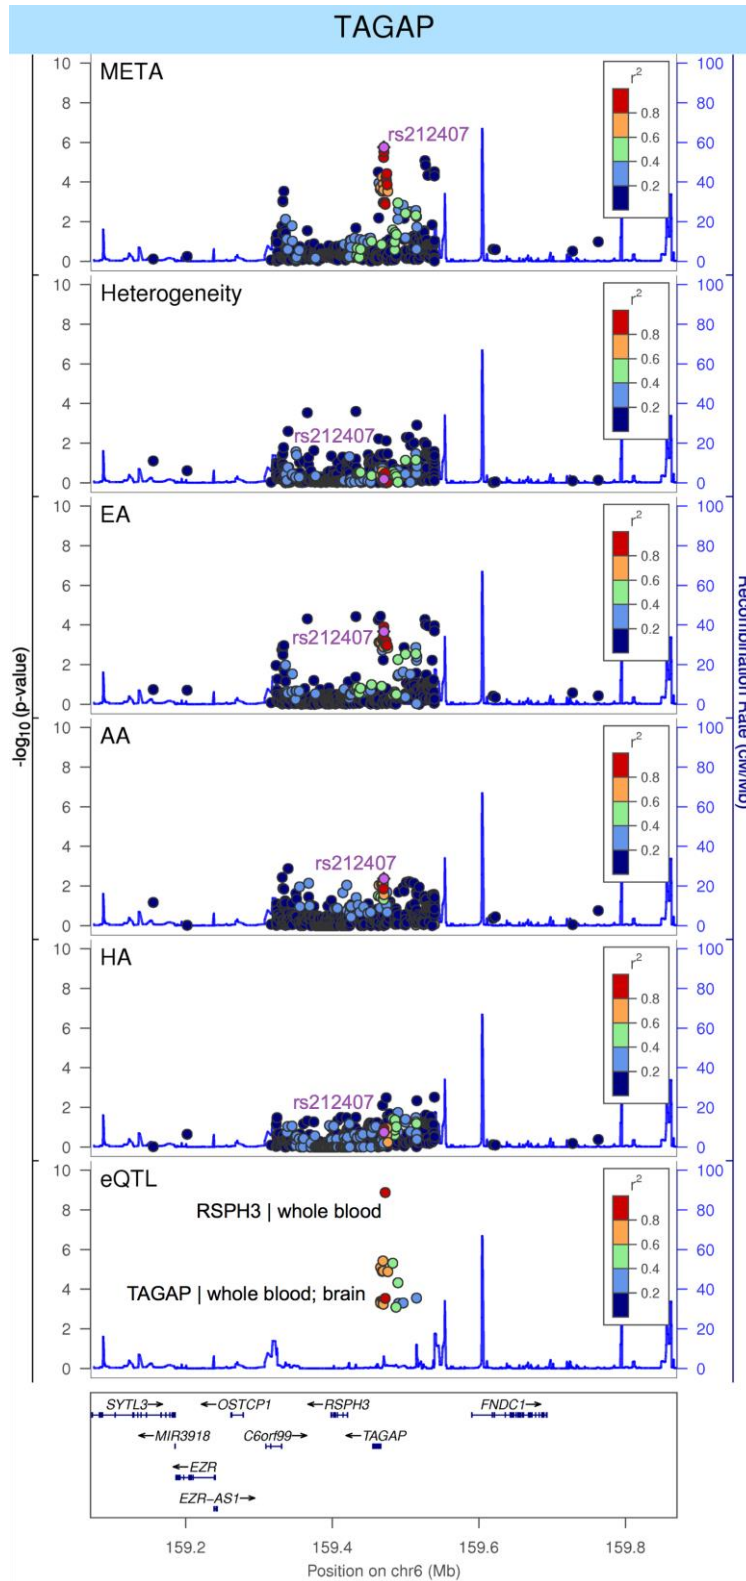

I. JAZF1

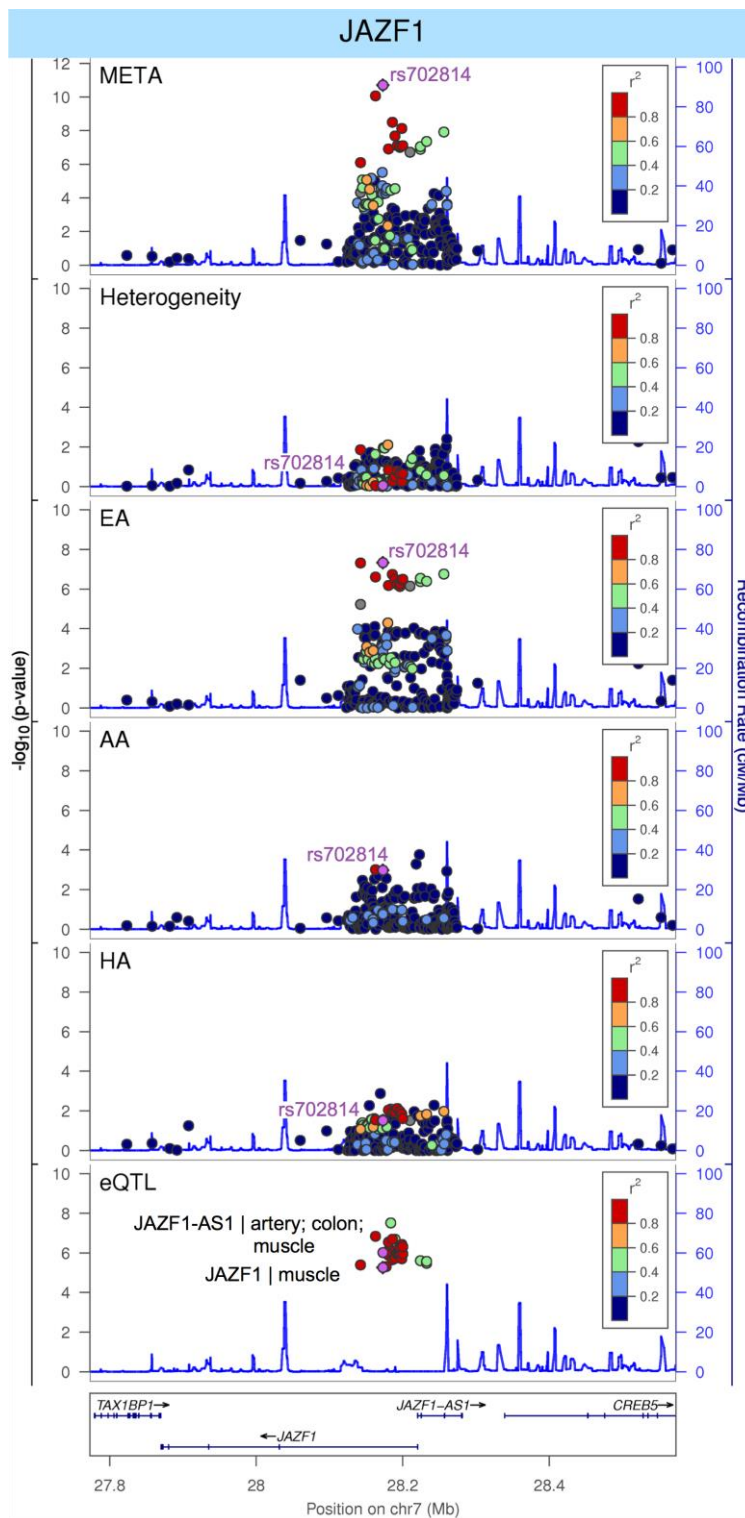

m. C7orf72-IKZF1

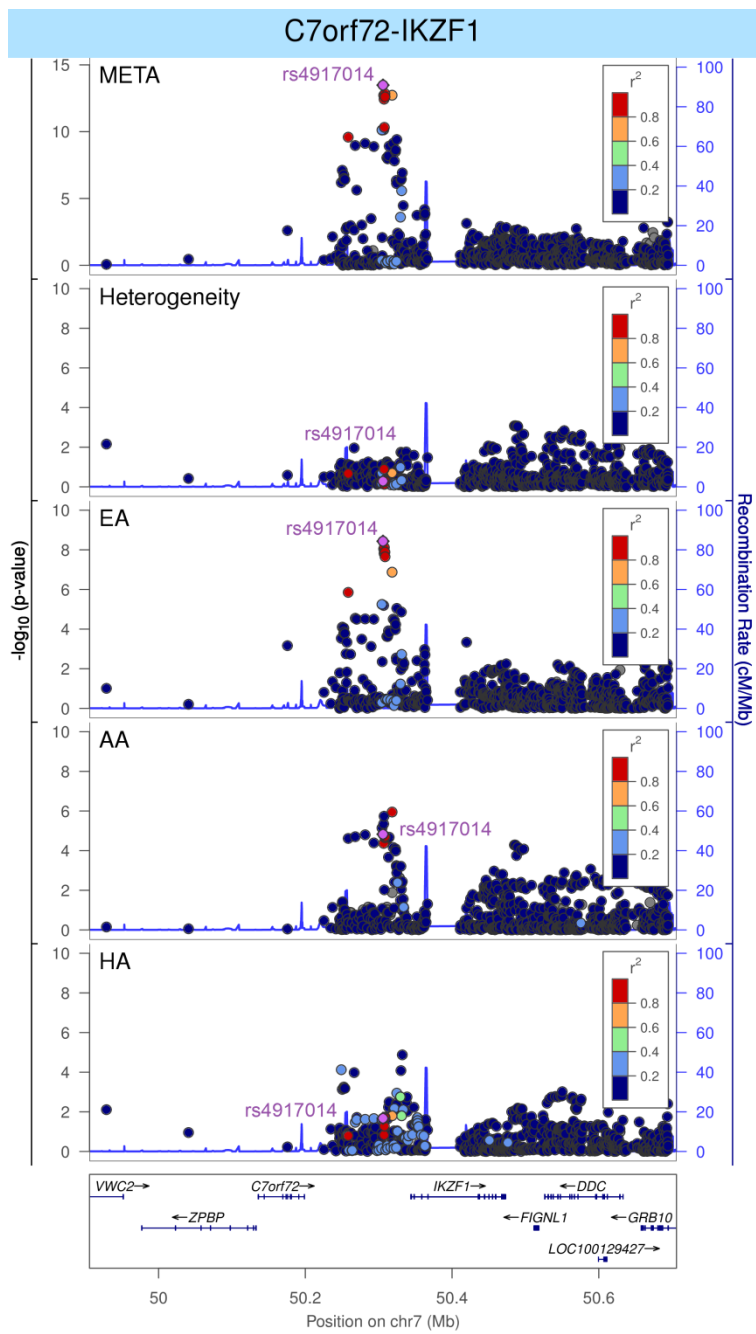

n. BLK

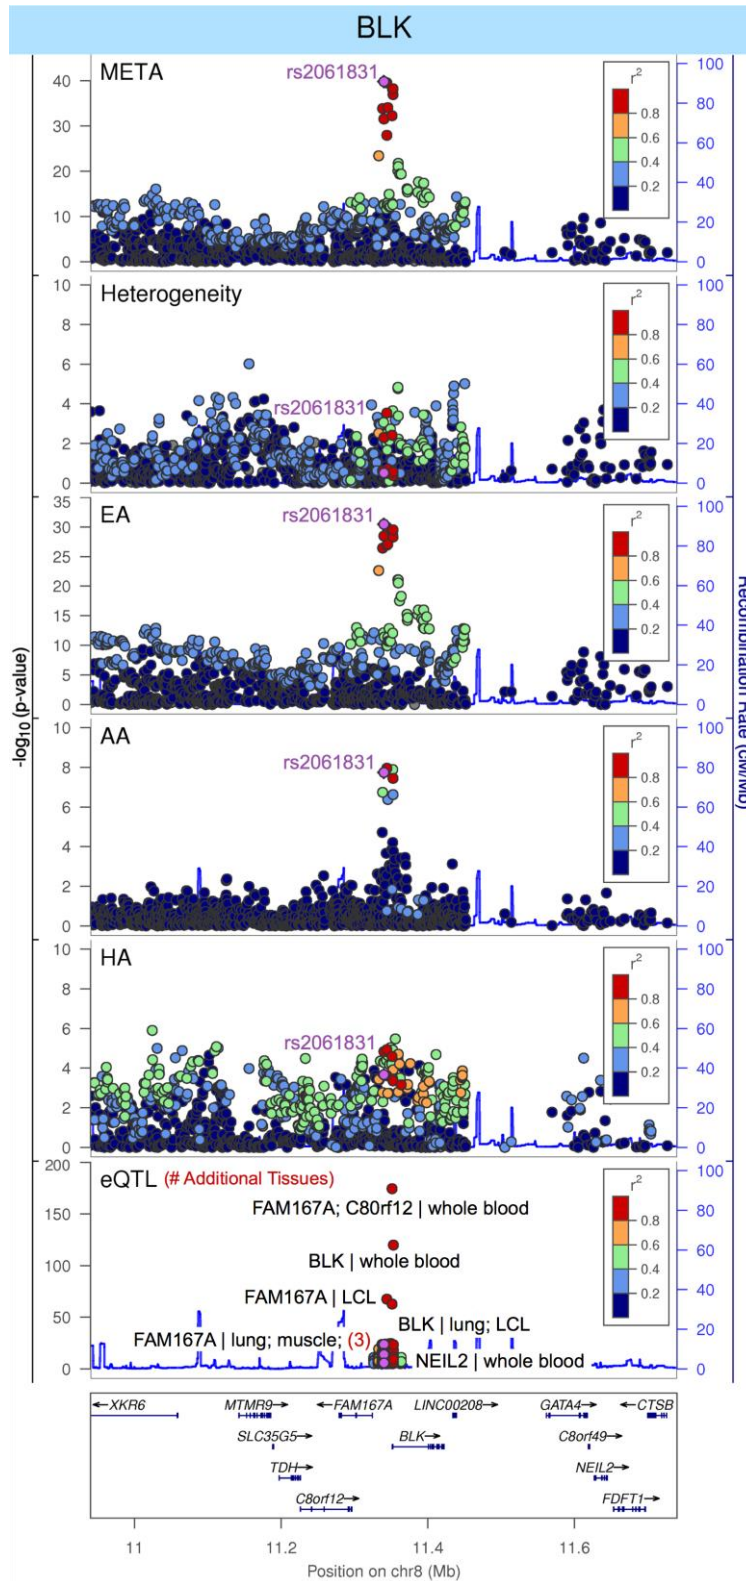

o. WDFY4

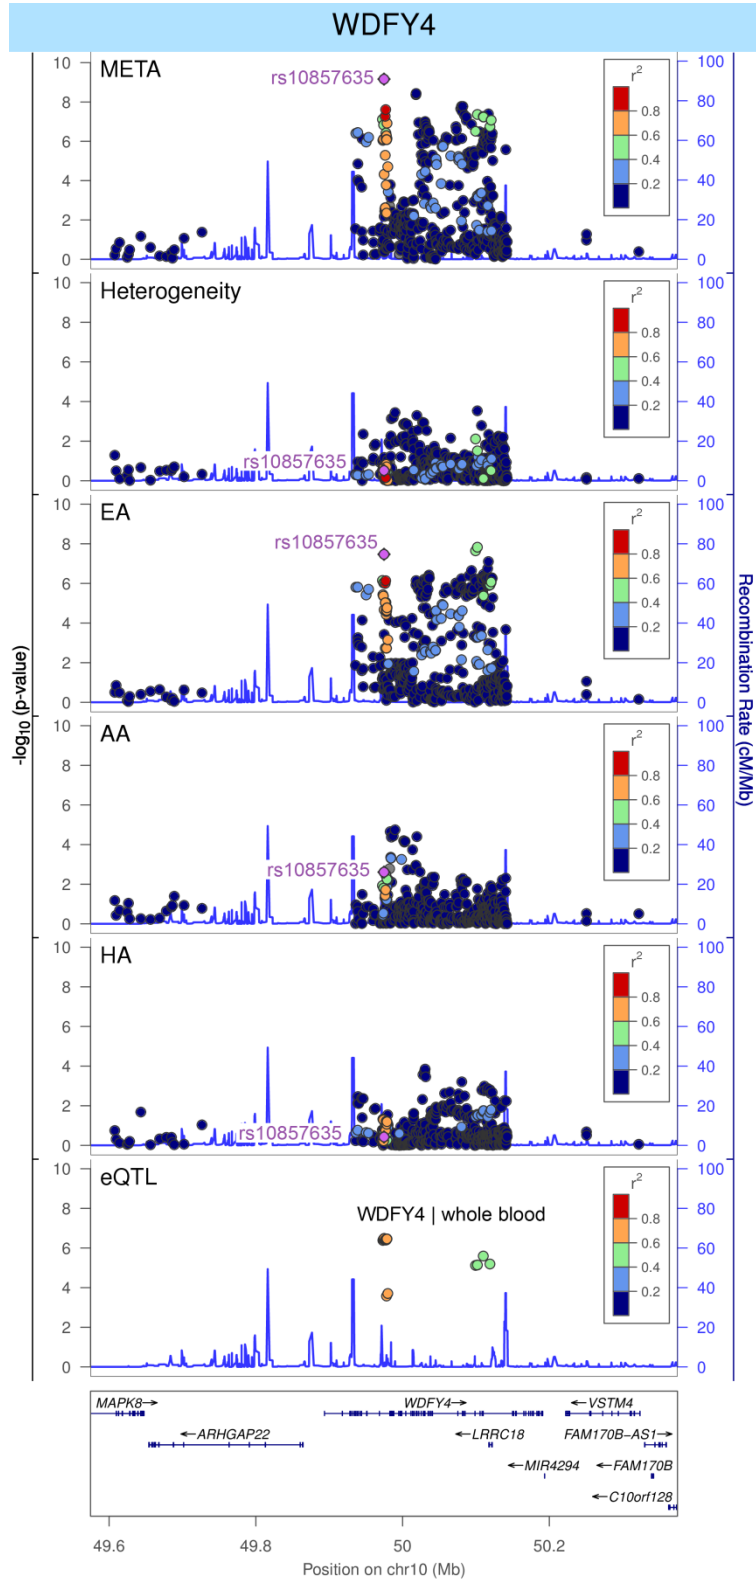

p. ETS1

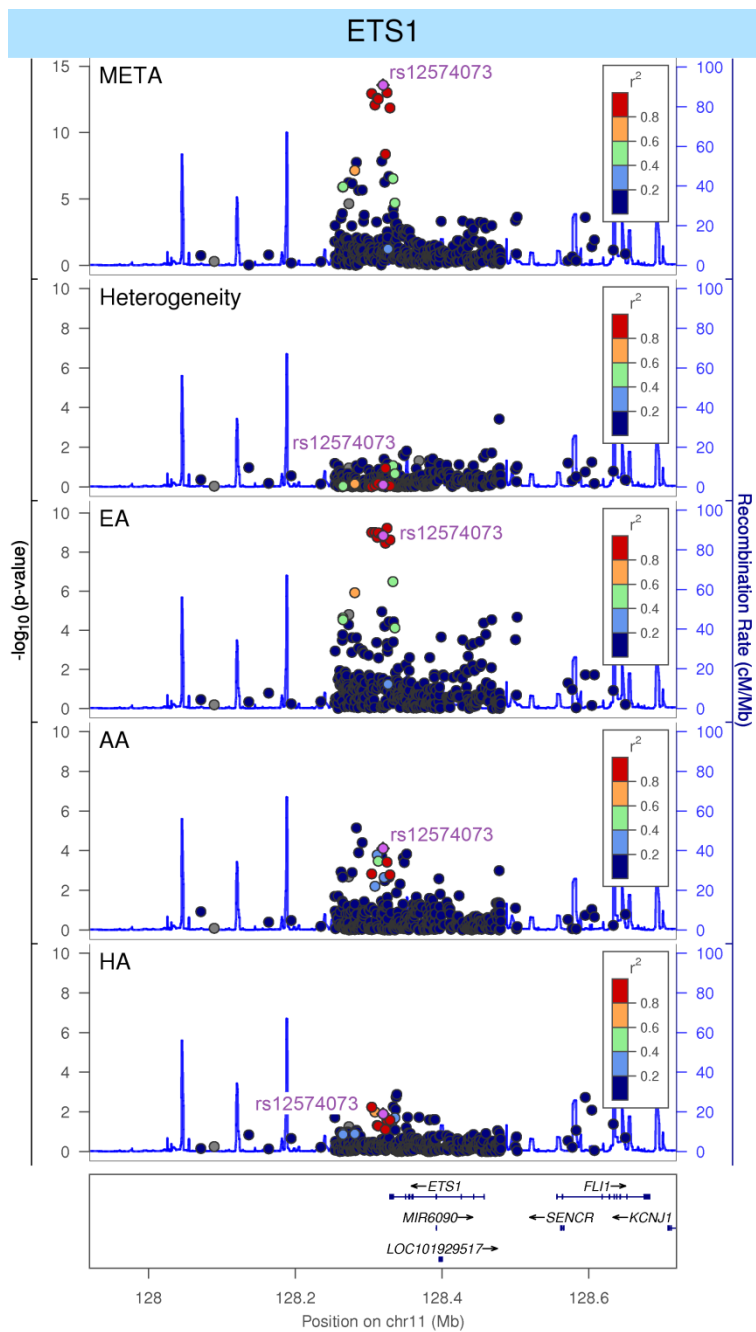

q. ATXN2

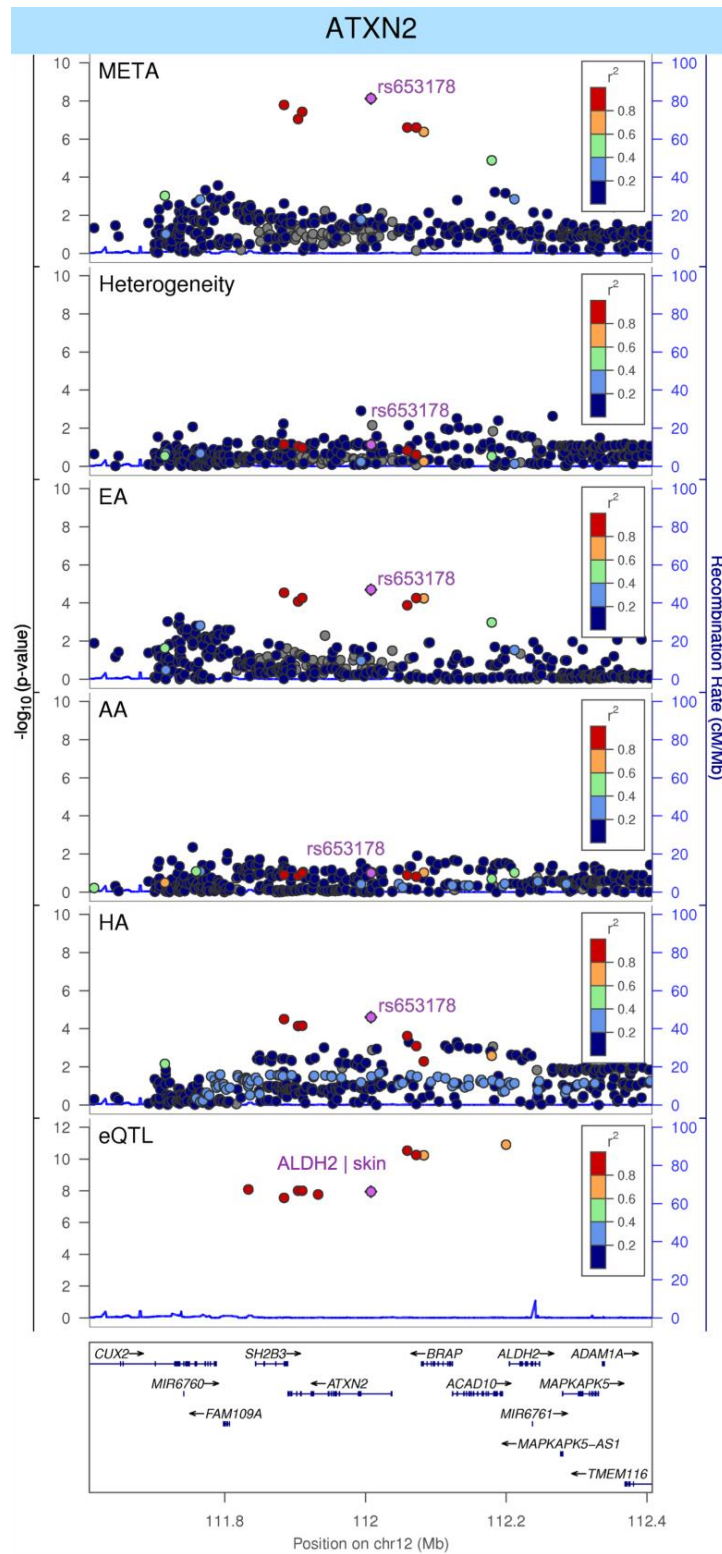

r. ITGAM

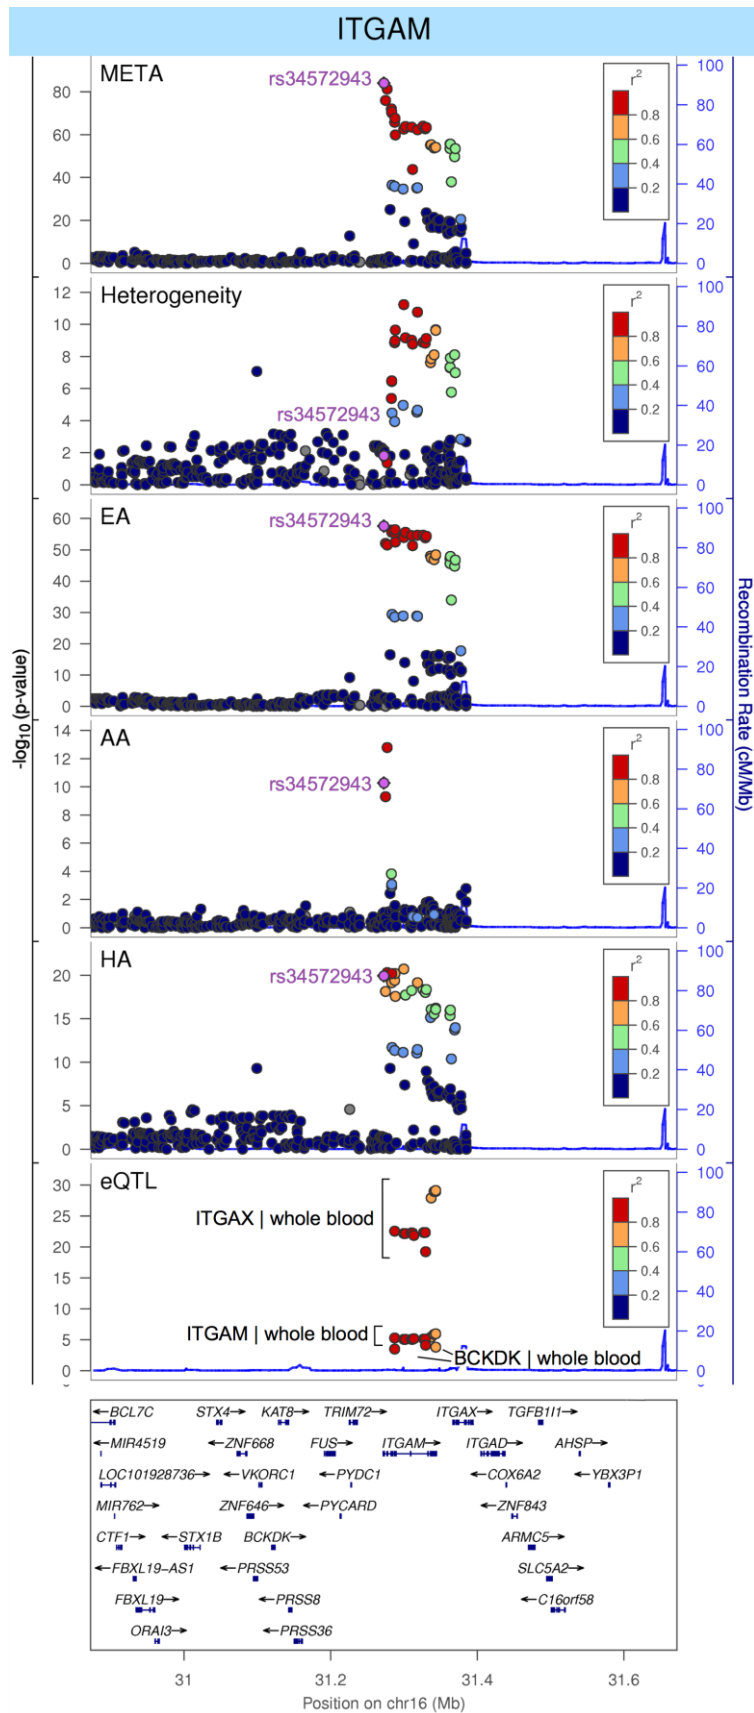





**Supplementary Figure 17. The non-additive effect of EA risk-allele genetic load on SLE risk (beta values).** Plots of the beta (natural logarithm of the odds ratio), instead of the odds ratios, as found in **Figure 5**.

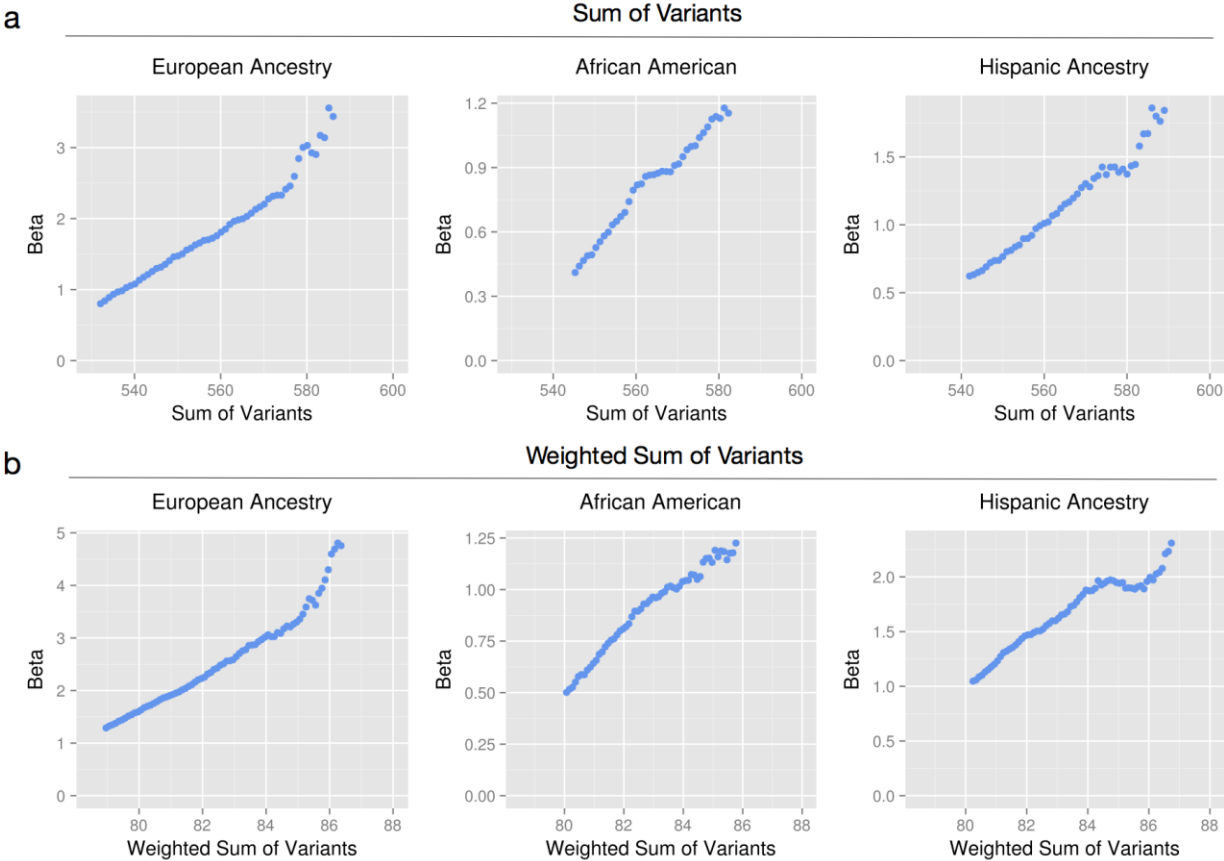

**Supplementary Figure 18. Kaplan-Meier curve for age at SLE diagnosis.**

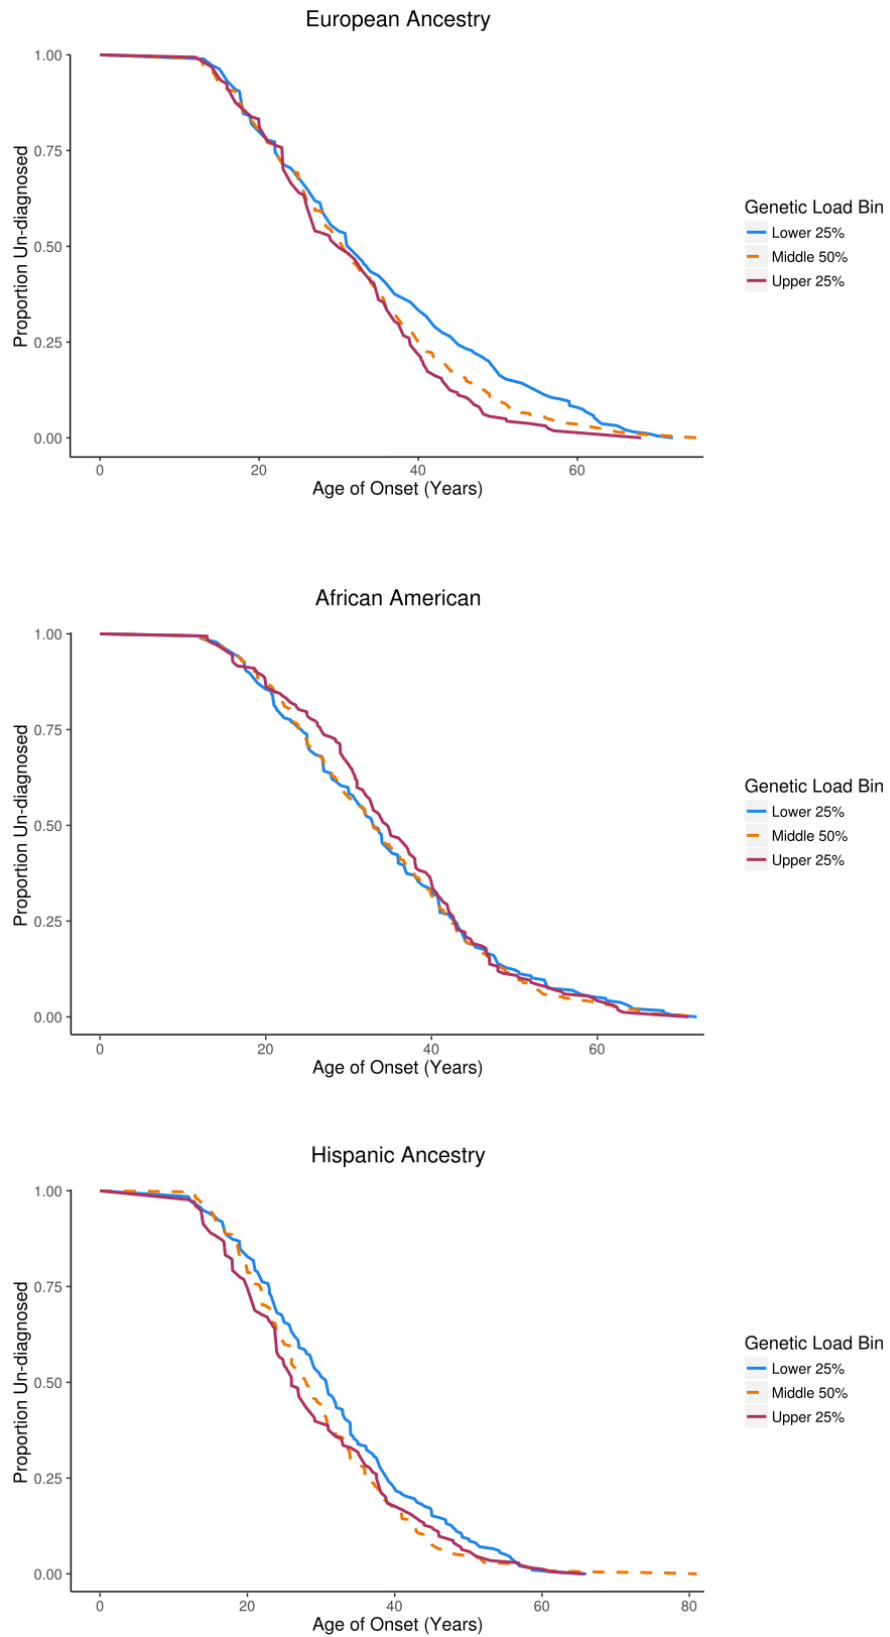

Supplement: ncomms16021-s1.pdf [file ncomms16021-s1.pdf]
